# Supplementary material for: Unexpected regio- and chemoselectivity of cationic gold-catalyzed cycloisomerizations of propargylureas: access to tetrasubstituted 3,4-dihydropyrimidin-2(1H)-ones
Source: Royal Society of Chemistry journal article supplement (doi:10.1039/c3ob42221f), 2014-01-01
Supplement: c3ob42221f.pdf [file c3ob42221f.pdf]

## SUPPORTING INFORMATION

### Unexpected Regio- and Chemoselectivity of Cationic Gold-Catalyzed Cycloisomerizations of Propargylureas: Access to Tetrasubstituted 3,4- Dihydropyrimidin-2(1*H*)-ones

Olga P. Pereshivko,<sup>a</sup> Vsevolod A. Peshkov,<sup>\*†a</sup> Anatoly A. Peshkov,<sup>a</sup> Jeroen Jacobs,<sup>b</sup> Luc Van Meervelt<sup>b</sup>  
and Erik V. Van der Eycken<sup>\*a</sup>

<sup>a</sup> *Laboratory for Organic & Microwave-Assisted Chemistry (LOMAC), Department of Chemistry, University of Leuven (KU Leuven), Celestijnenlaan 200F, B-3001, Leuven, Belgium.*

*E-mails: vapeshkov@gmail.com; erik.vandereycken@chem.kuleuven.be*

<sup>b</sup> *Biomolecular Architecture, Department of Chemistry, University of Leuven (KU Leuven), Celestijnenlaan 200F, B-3001, Leuven, Belgium*

† Present address: Department of Chemistry, University of Pittsburgh, 219 Parkman Avenue, Pittsburgh, Pennsylvania 15260, United States

## TABLE OF CONTENTS

|                                                                                                                                                     |       |
|-----------------------------------------------------------------------------------------------------------------------------------------------------|-------|
| This page                                                                                                                                           | 1     |
| Copies of <sup>1</sup> H and <sup>13</sup> C NMR spectra for <b>5a-s</b>                                                                            | 2-39  |
| Copies of <sup>1</sup> H and <sup>13</sup> C NMR spectra for <b>2l,m,q</b>                                                                          | 40-45 |
| Copies of <sup>1</sup> H and <sup>13</sup> C NMR spectra for <b>9r,s</b>                                                                            | 46-49 |
| Copies of <sup>1</sup> H and <sup>13</sup> C NMR spectra for <b>8d,h,k</b>                                                                          | 50-55 |
| Copy of <sup>1</sup> H spectra for <b>9q</b>                                                                                                        | 56    |
| Transformations of imidazolidin-2-ones <b>9q,s</b> and 3,4-dihydropyrimidin-2(1 <i>H</i> )-one <b>5s</b> observed upon storage of their NMR samples | 57-58 |
| Copies of <sup>1</sup> H and <sup>13</sup> C NMR spectra for <b>9t</b>                                                                              | 59-60 |
| Crystallographic data for <b>5a</b> and <b>2a</b>                                                                                                   | 61    |

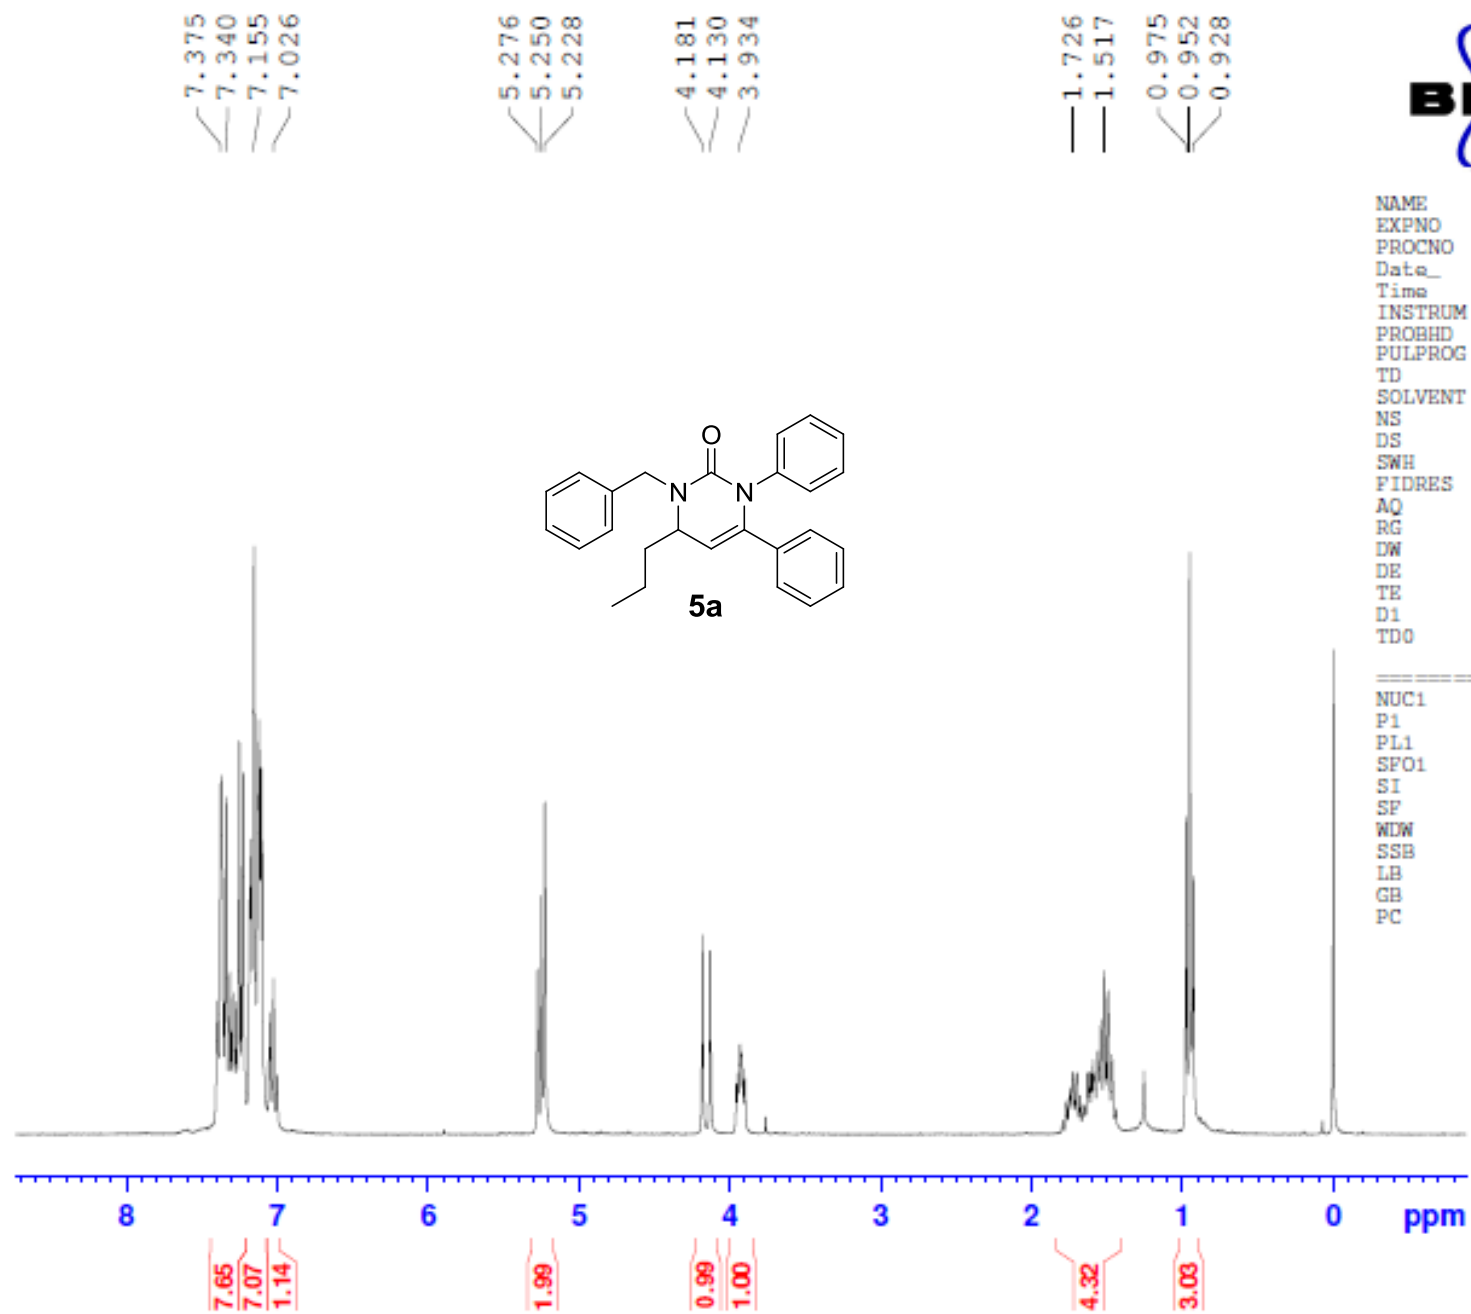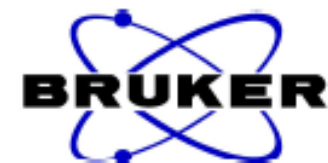

```
NAME          OP295
EXPNO         10
PROCNO        1
Date_         20130301
Time          3.31
INSTRUM       spect
PROBHD        5 mm BBO BB-1H
PULPROG       zg30
TD            32768
SOLVENT       CDCl3
NS            16
DS            2
SWH           6172.839 Hz
FIDRES        0.188380 Hz
AQ            2.6542580 sec
RG            456.1
DW            81.000 usec
DE            6.50 usec
TE            296.9 K
D1            1.00000000 sec
TD0           1
```

```
===== CHANNEL f1 =====
NUC1           1H
P1             9.50 usec
PL1            0.00 dB
SFO1          300.1318534 MHz
SI            32768
SF            300.1300108 MHz
WDW            EM
SSB            0
LB             0.30 Hz
GB             0
PC             1.00
```

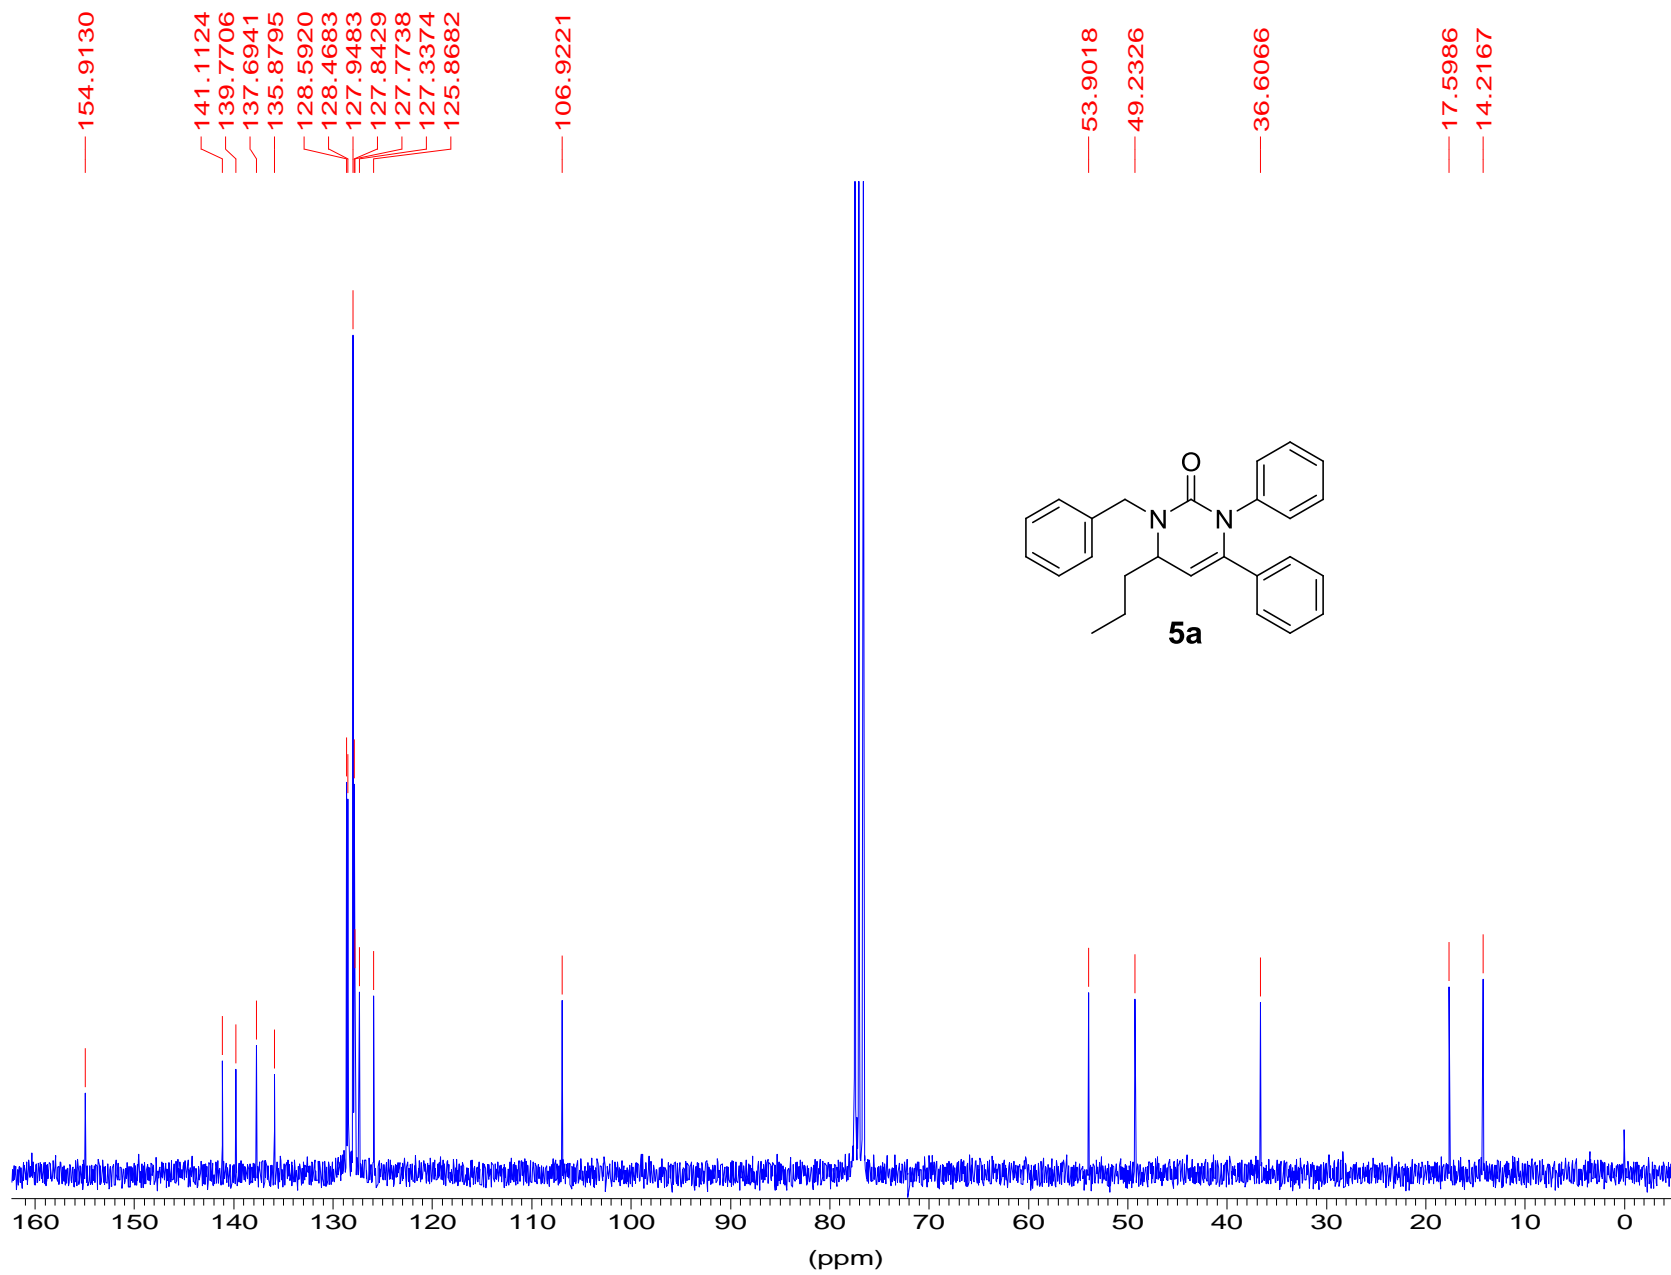

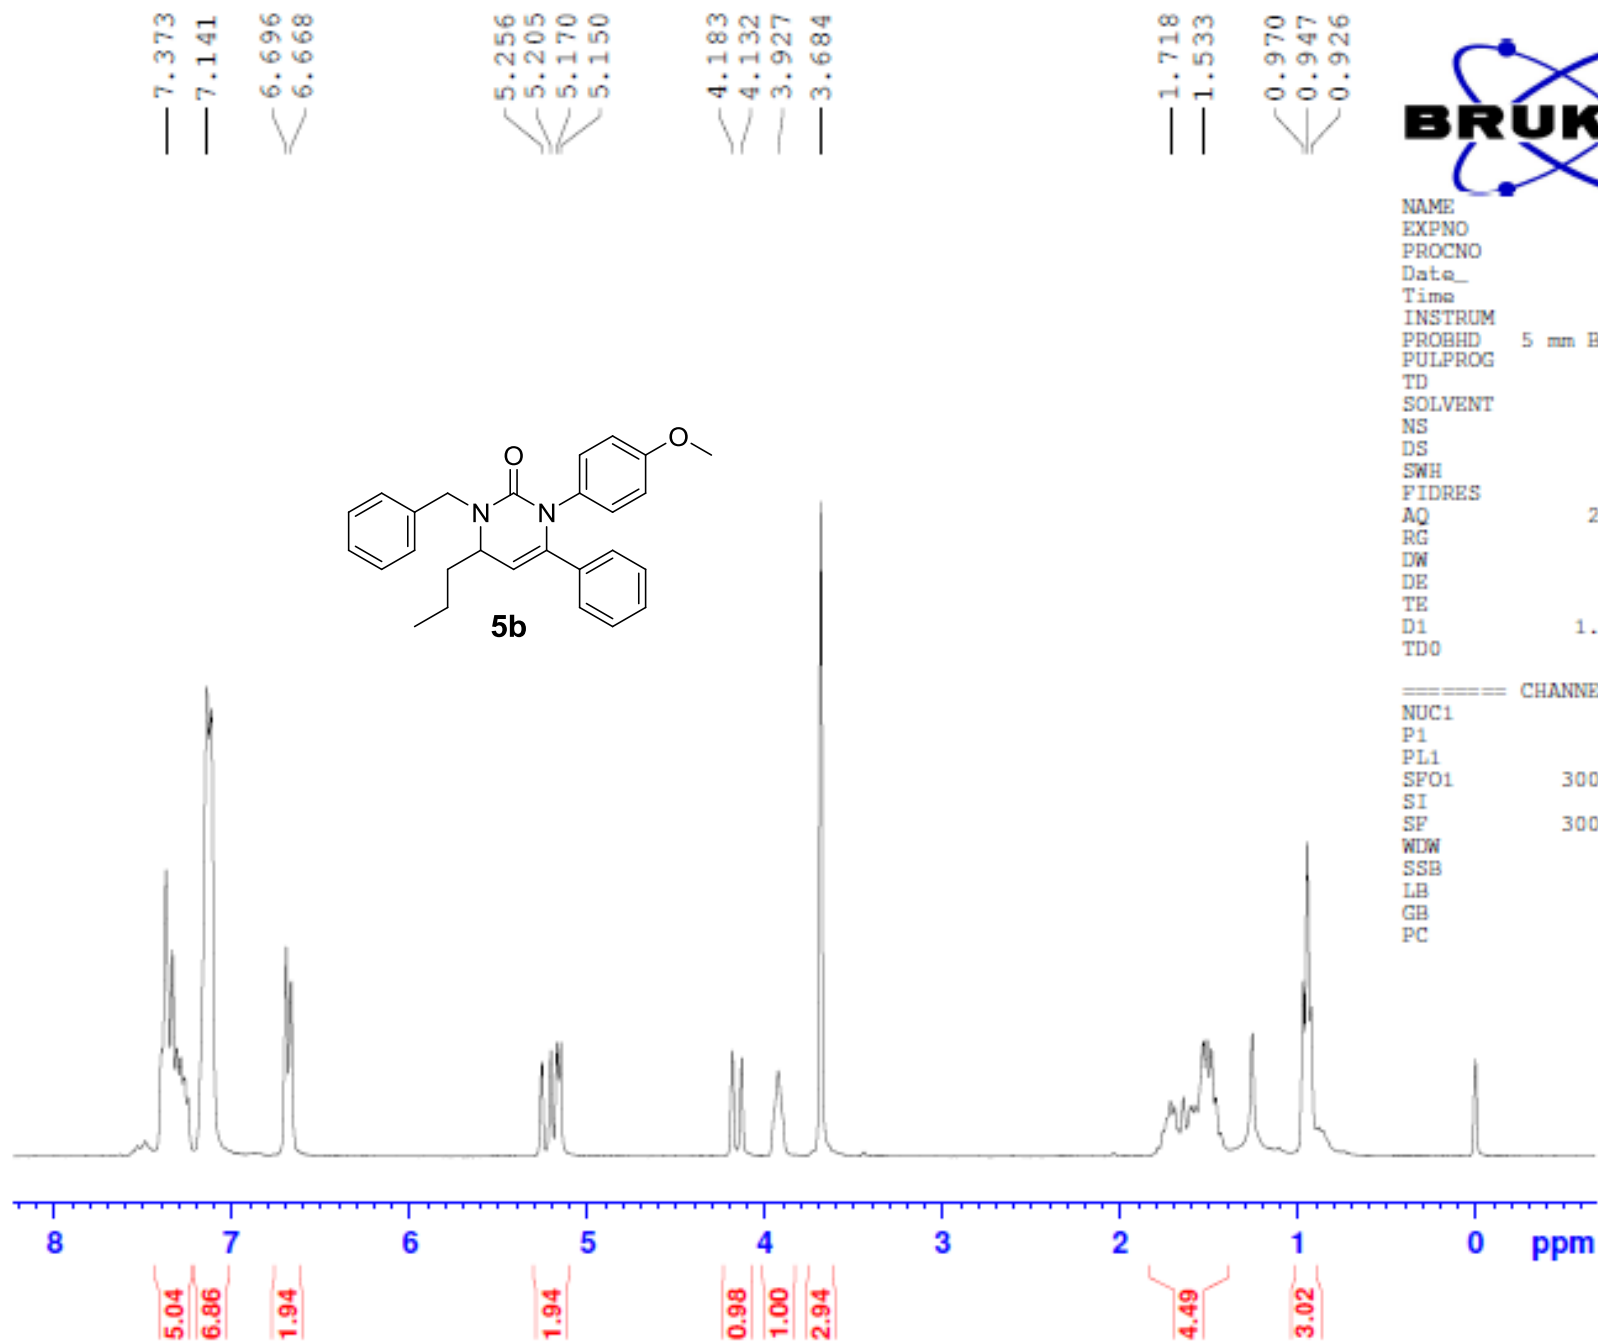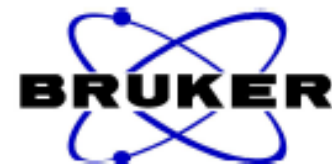

```
NAME          OP314
EXPNO         10
PROCNO        1
Date_         20121121
Time          6.58
INSTRUM       spect
PROBHD        5 mm BBO BB-1H
PULPROG       zg30
TD            32768
SOLVENT       CDC13
NS            16
DS            2
SWH           6172.839 Hz
FIDRES        0.188380 Hz
AQ            2.6542580 sec
RG            256
DW            81.000 usec
DE            6.50 usec
TE            296.5 K
D1            1.00000000 sec
TD0           1
```

```
===== CHANNEL f1 =====
NUC1          1H
P1            9.50 usec
PL1           0.00 dB
SFO1          300.1318534 MHz
SI            32768
SF            300.1300130 MHz
WDW           EM
SSB           0
LB            0.30 Hz
GB            0
PC            1.00
```

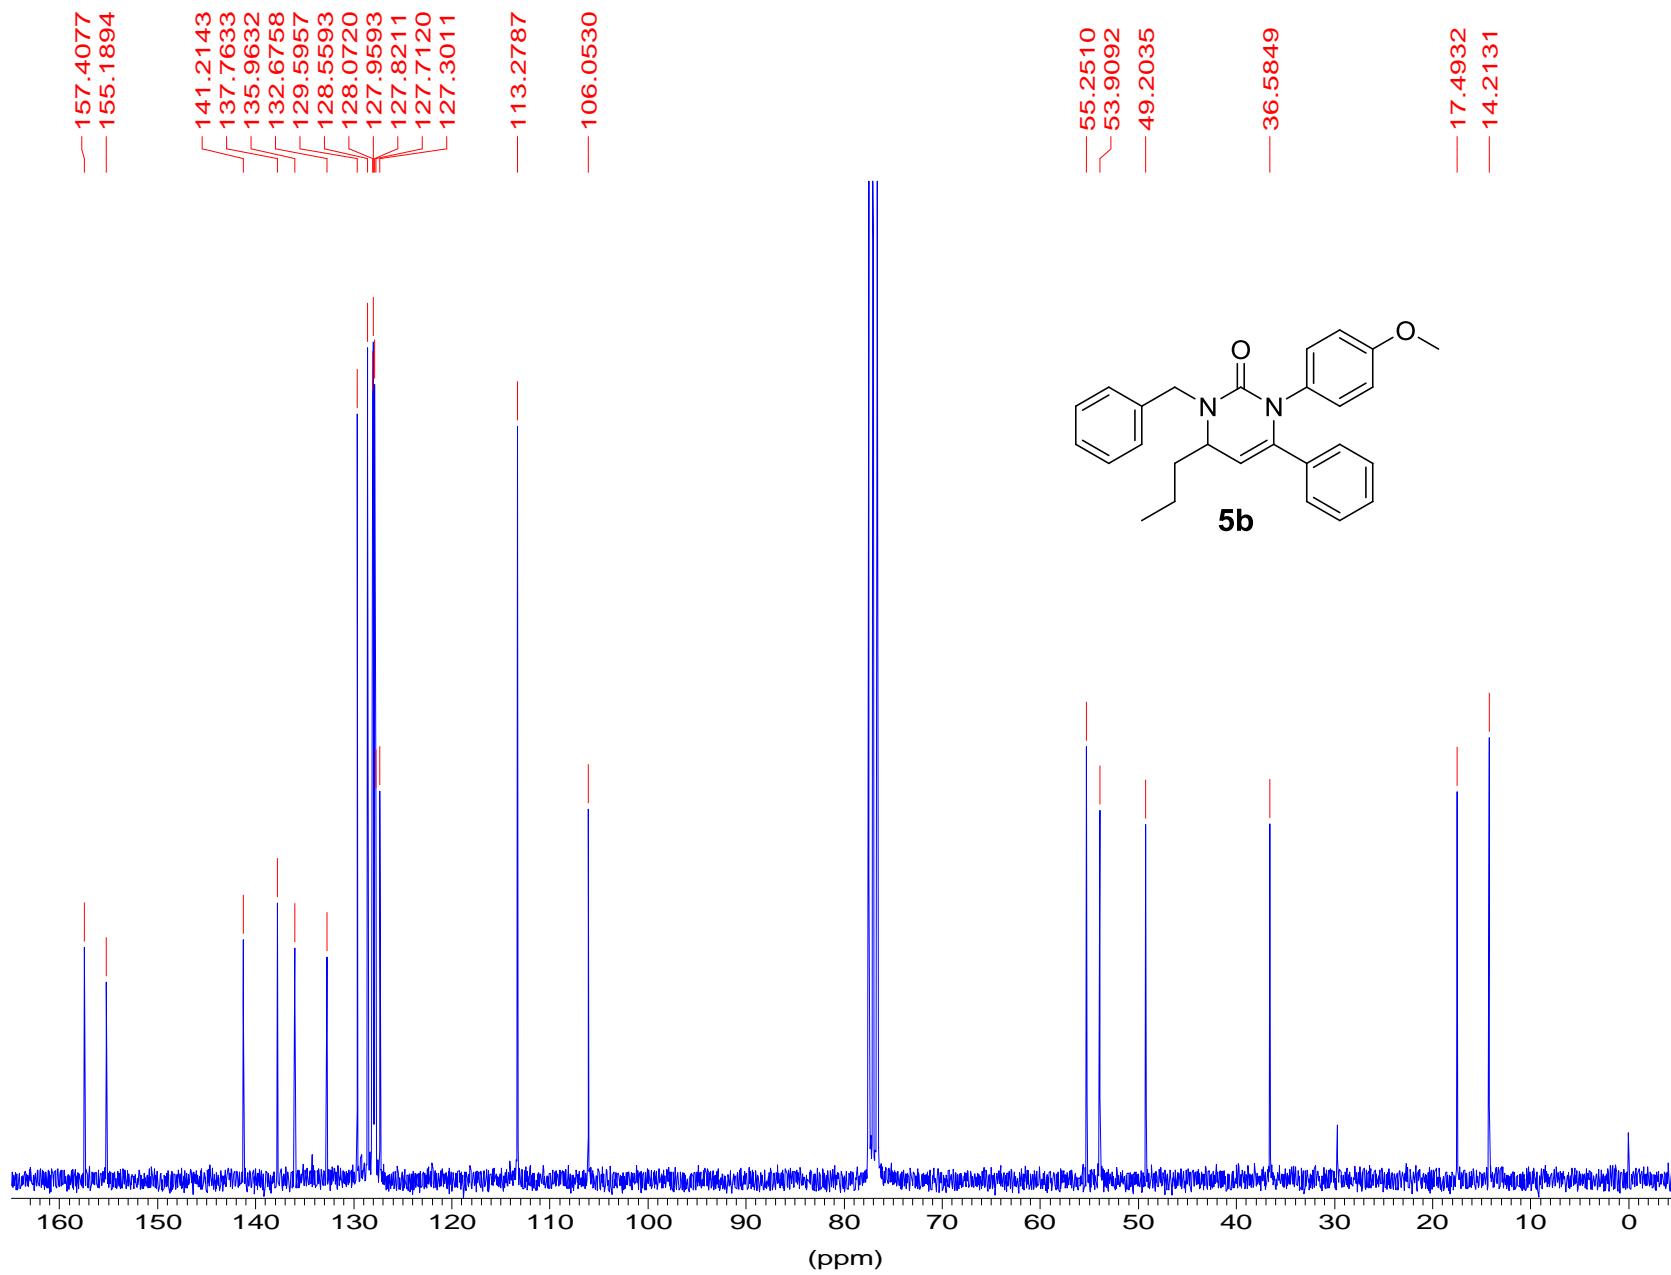

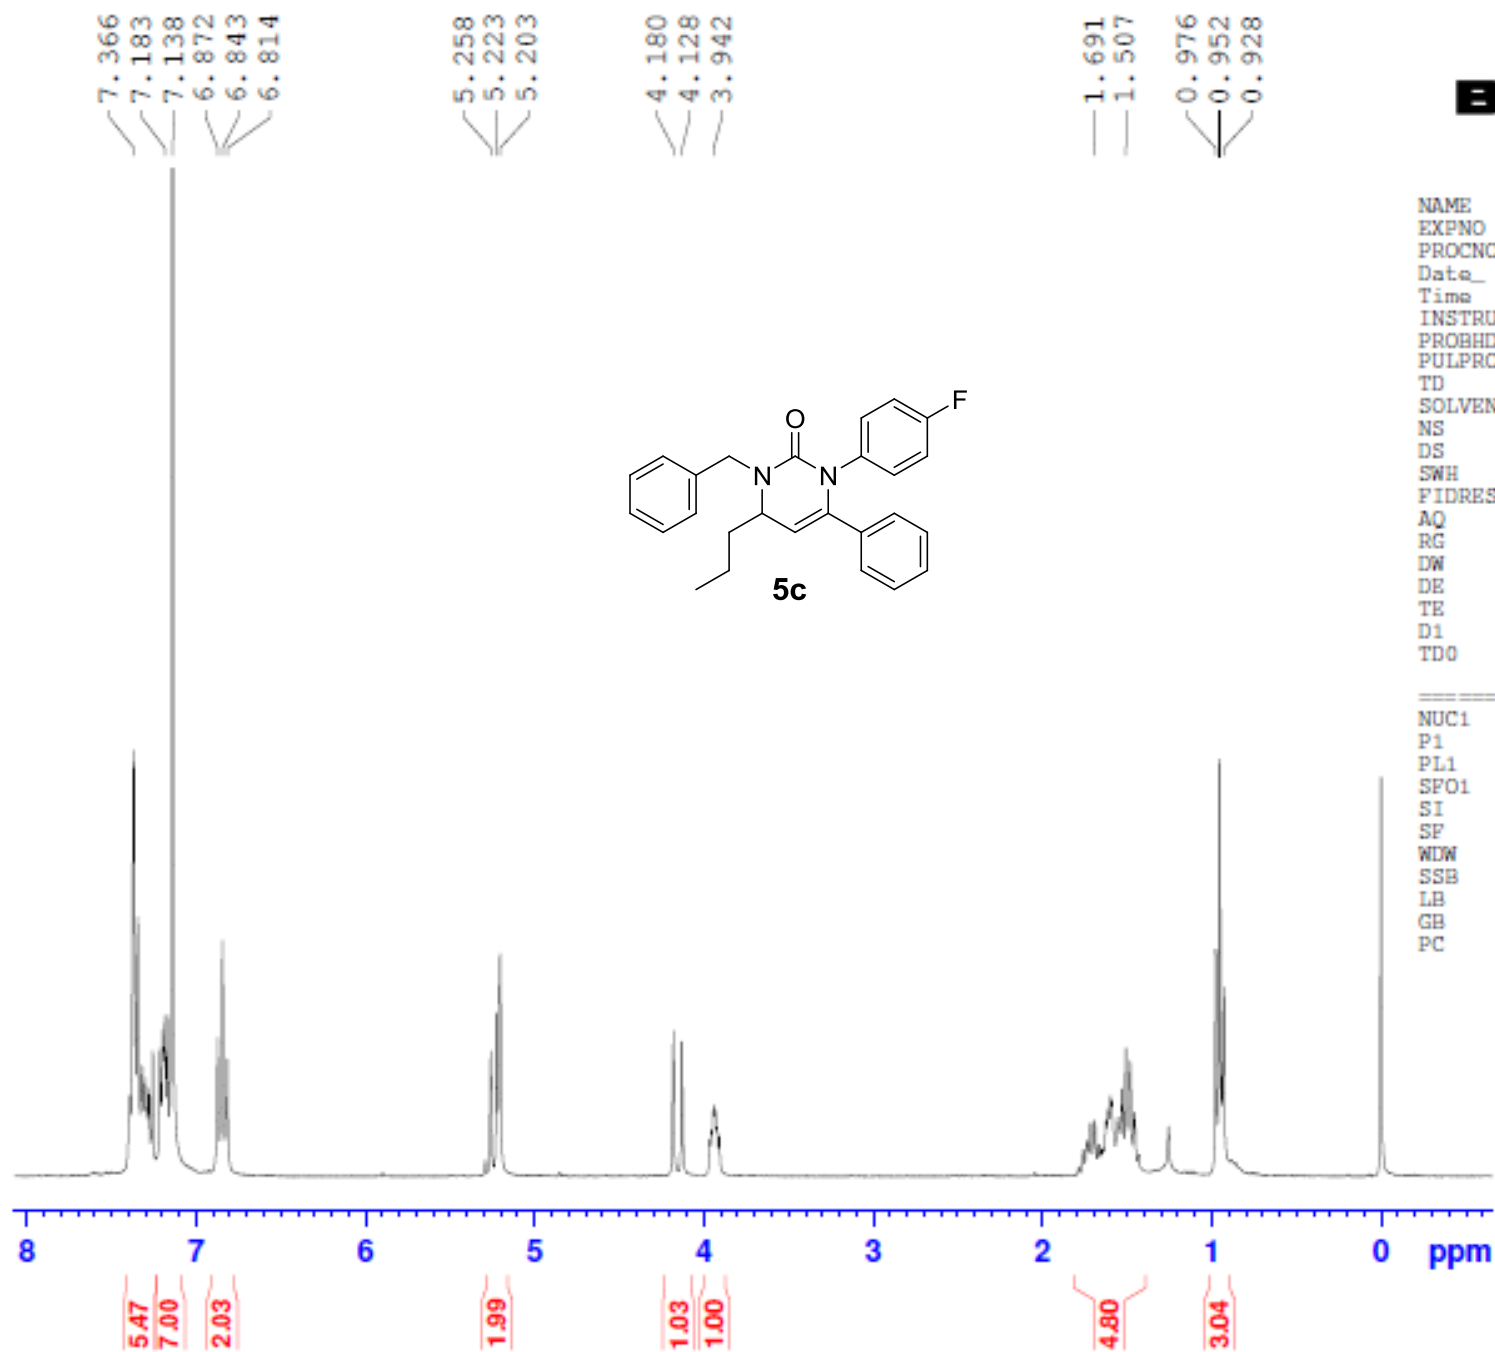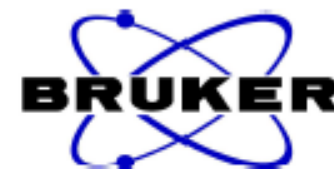

NAME op328-1  
EXPNO 30  
PROCNO 1  
Date\_ 20121210  
Time 10.04  
INSTRUM spect  
PROBHD 5 mm BBO BB-1H  
PULPROG zg30  
TD 32768  
SOLVENT CDC13  
NS 16  
DS 2  
SWH 6172.839 Hz  
FIDRES 0.188380 Hz  
AQ 2.6542580 sec  
RG 362  
DW 81.000 usec  
DE 6.50 usec  
TE 296.3 K  
D1 1.00000000 sec  
TD0 1

==== CHANNEL f1 =====  
NUC1 1H  
P1 9.50 usec  
PL1 0.00 dB  
SFO1 300.1318534 MHz  
SI 32768  
SF 300.1300080 MHz  
WDW EM  
SSB 0  
LB 0.30 Hz  
GB 0  
PC 1.00

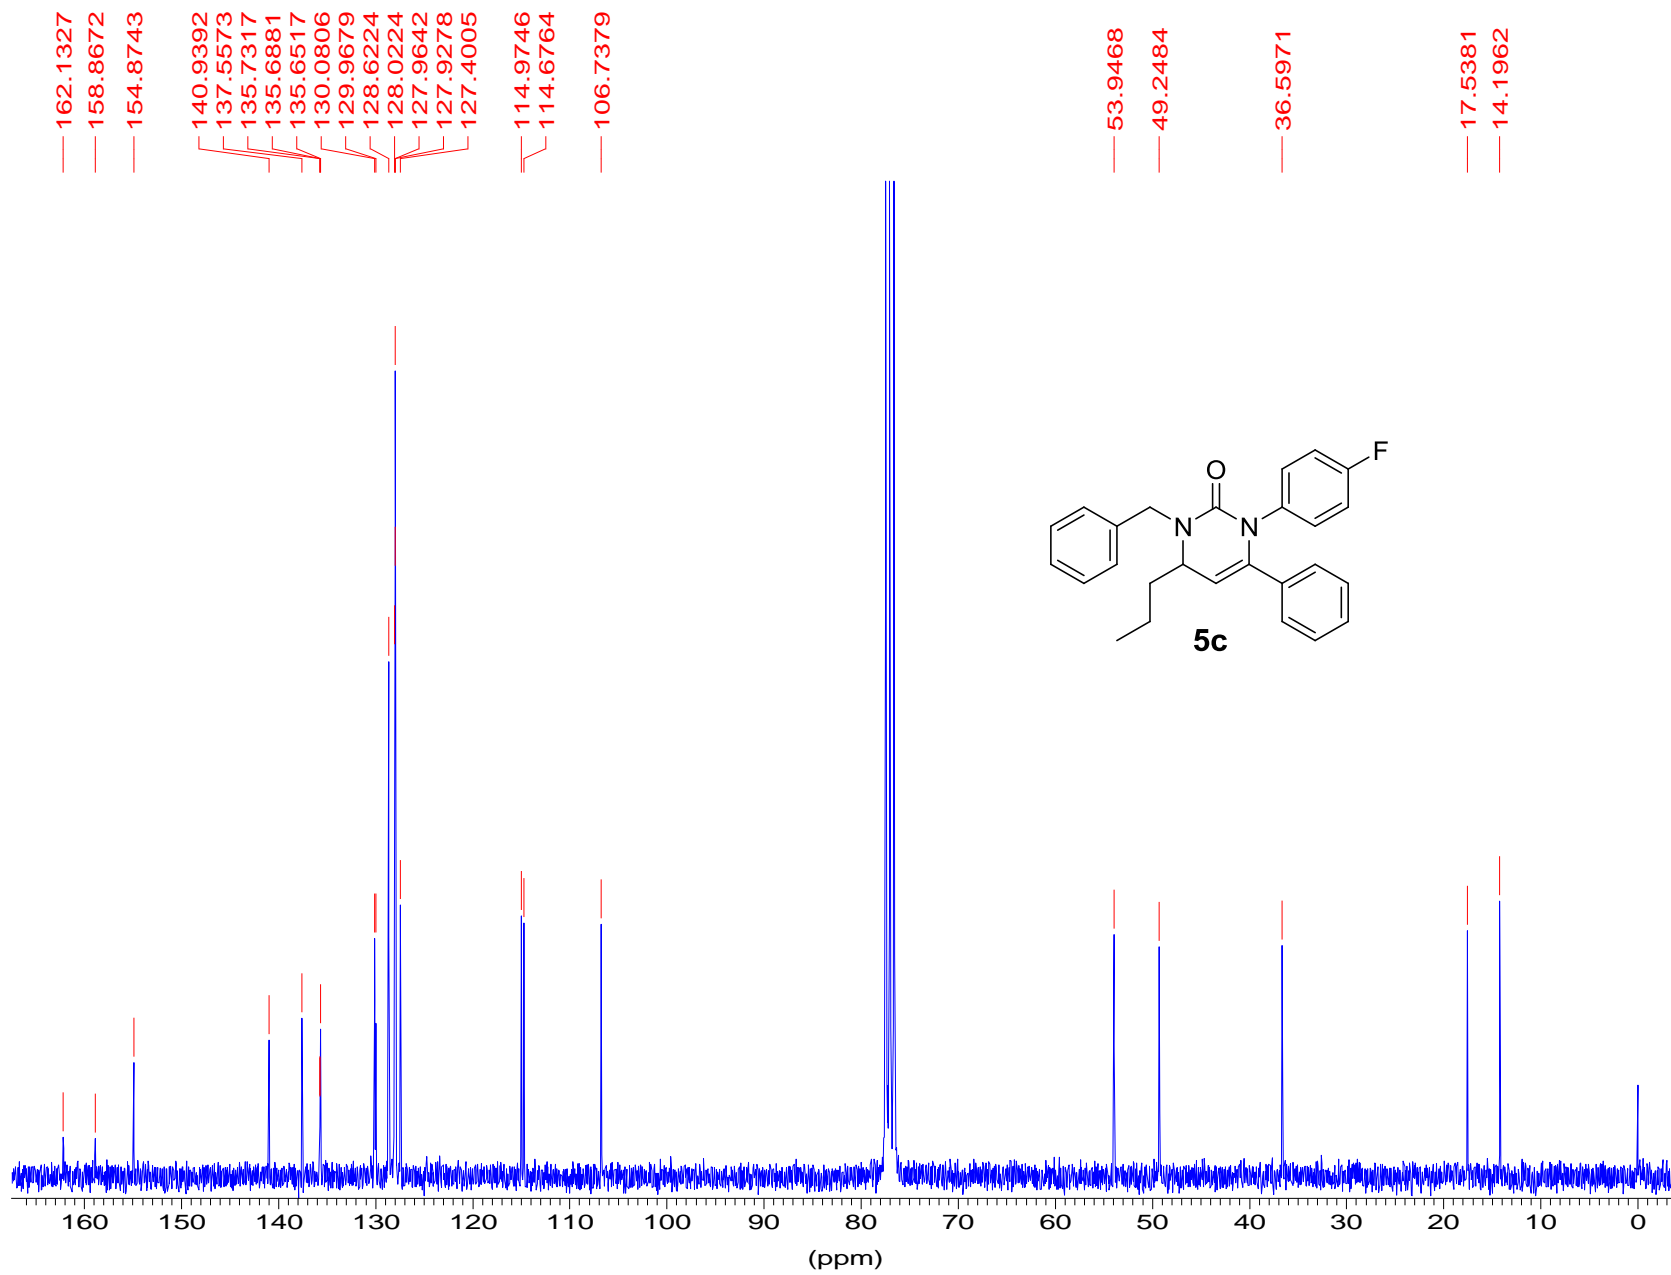

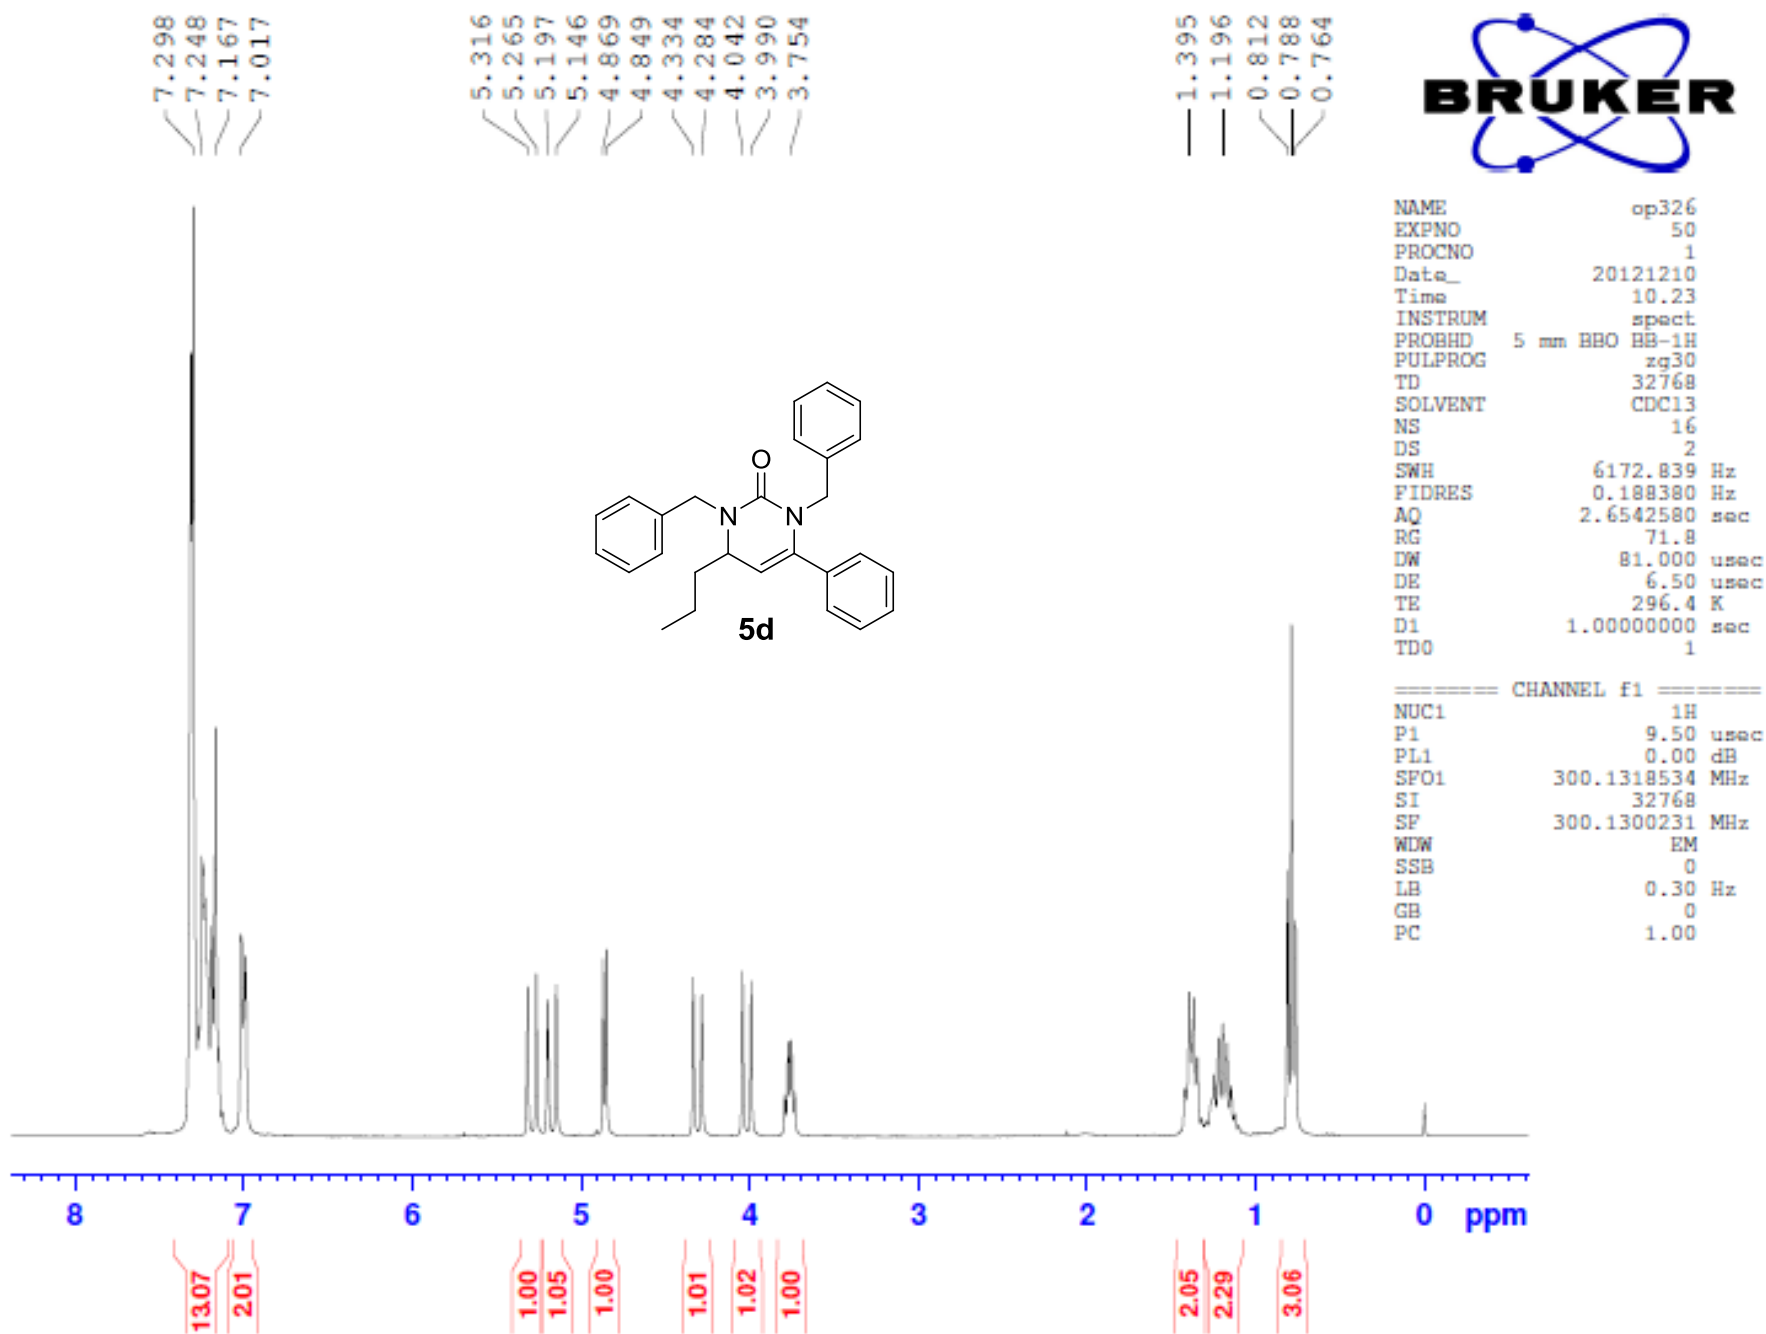



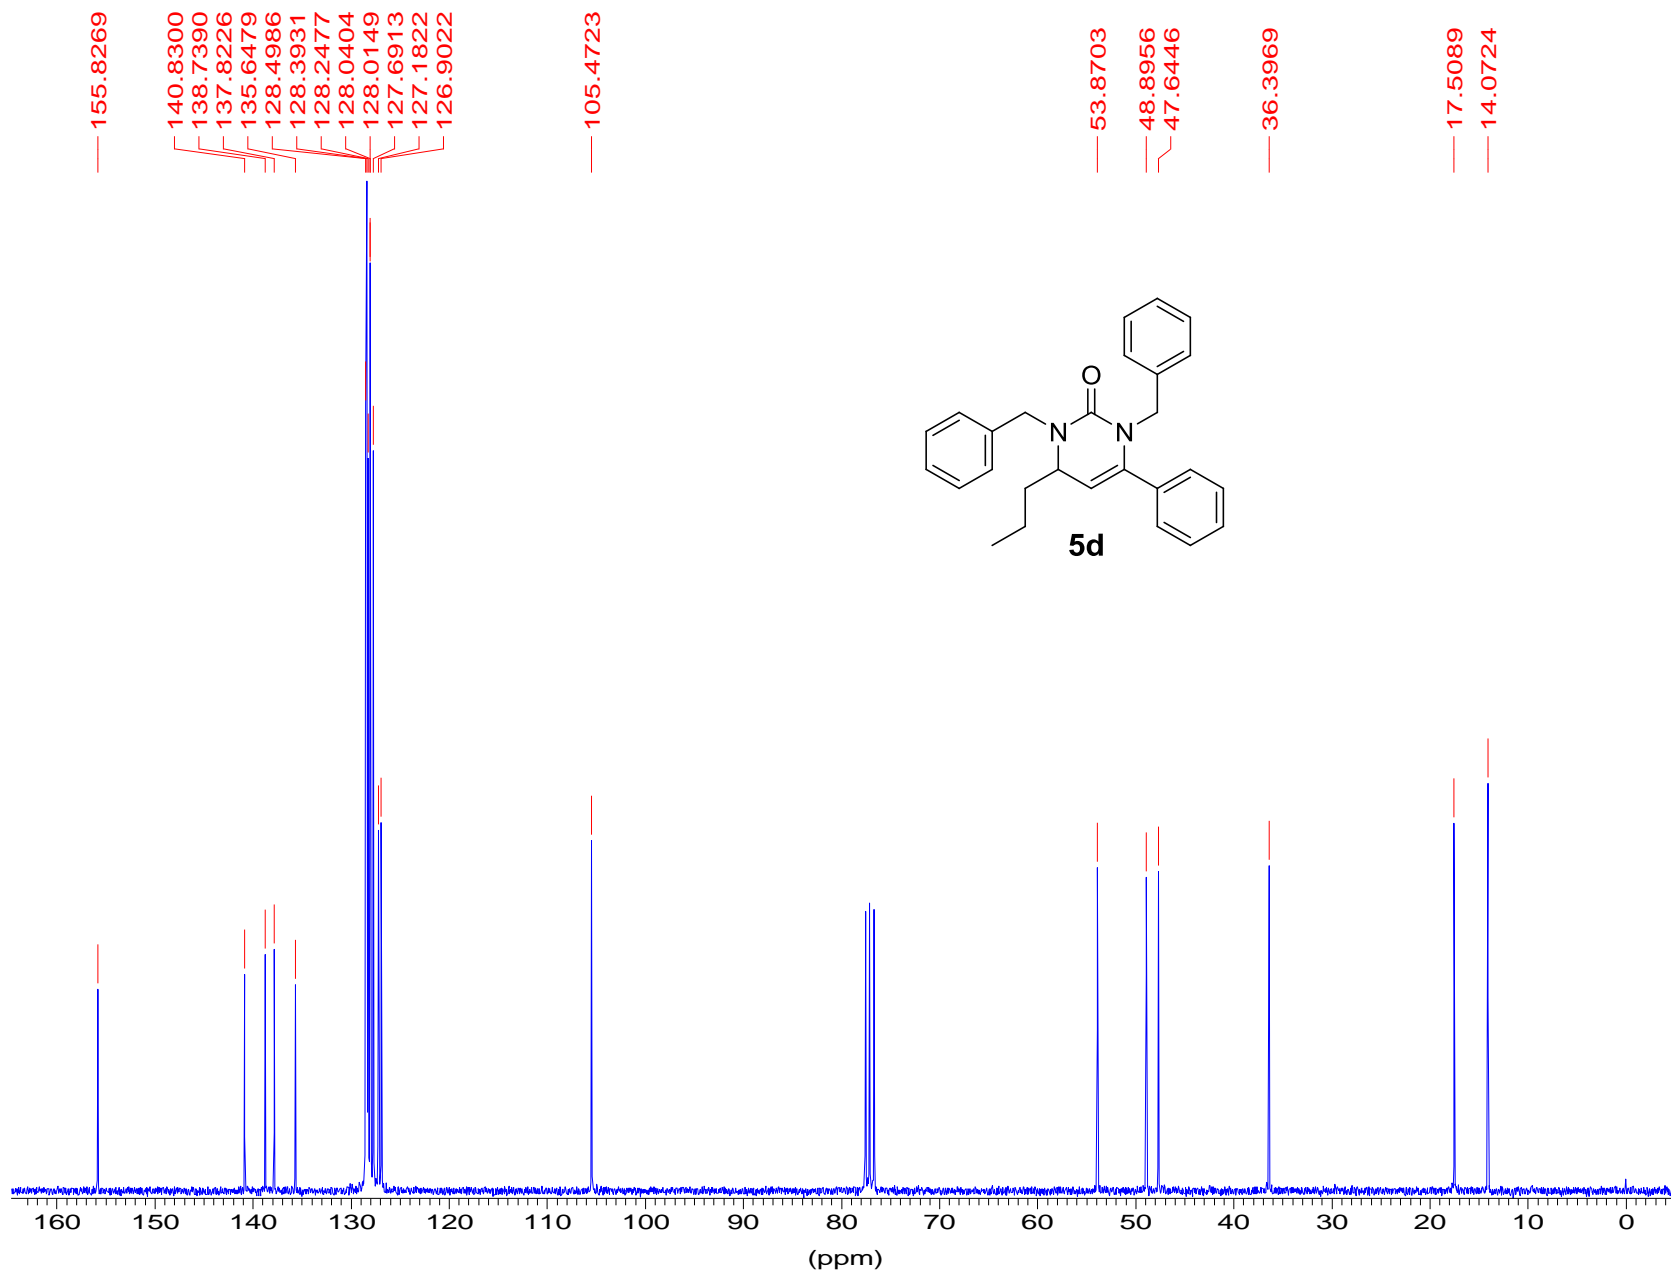

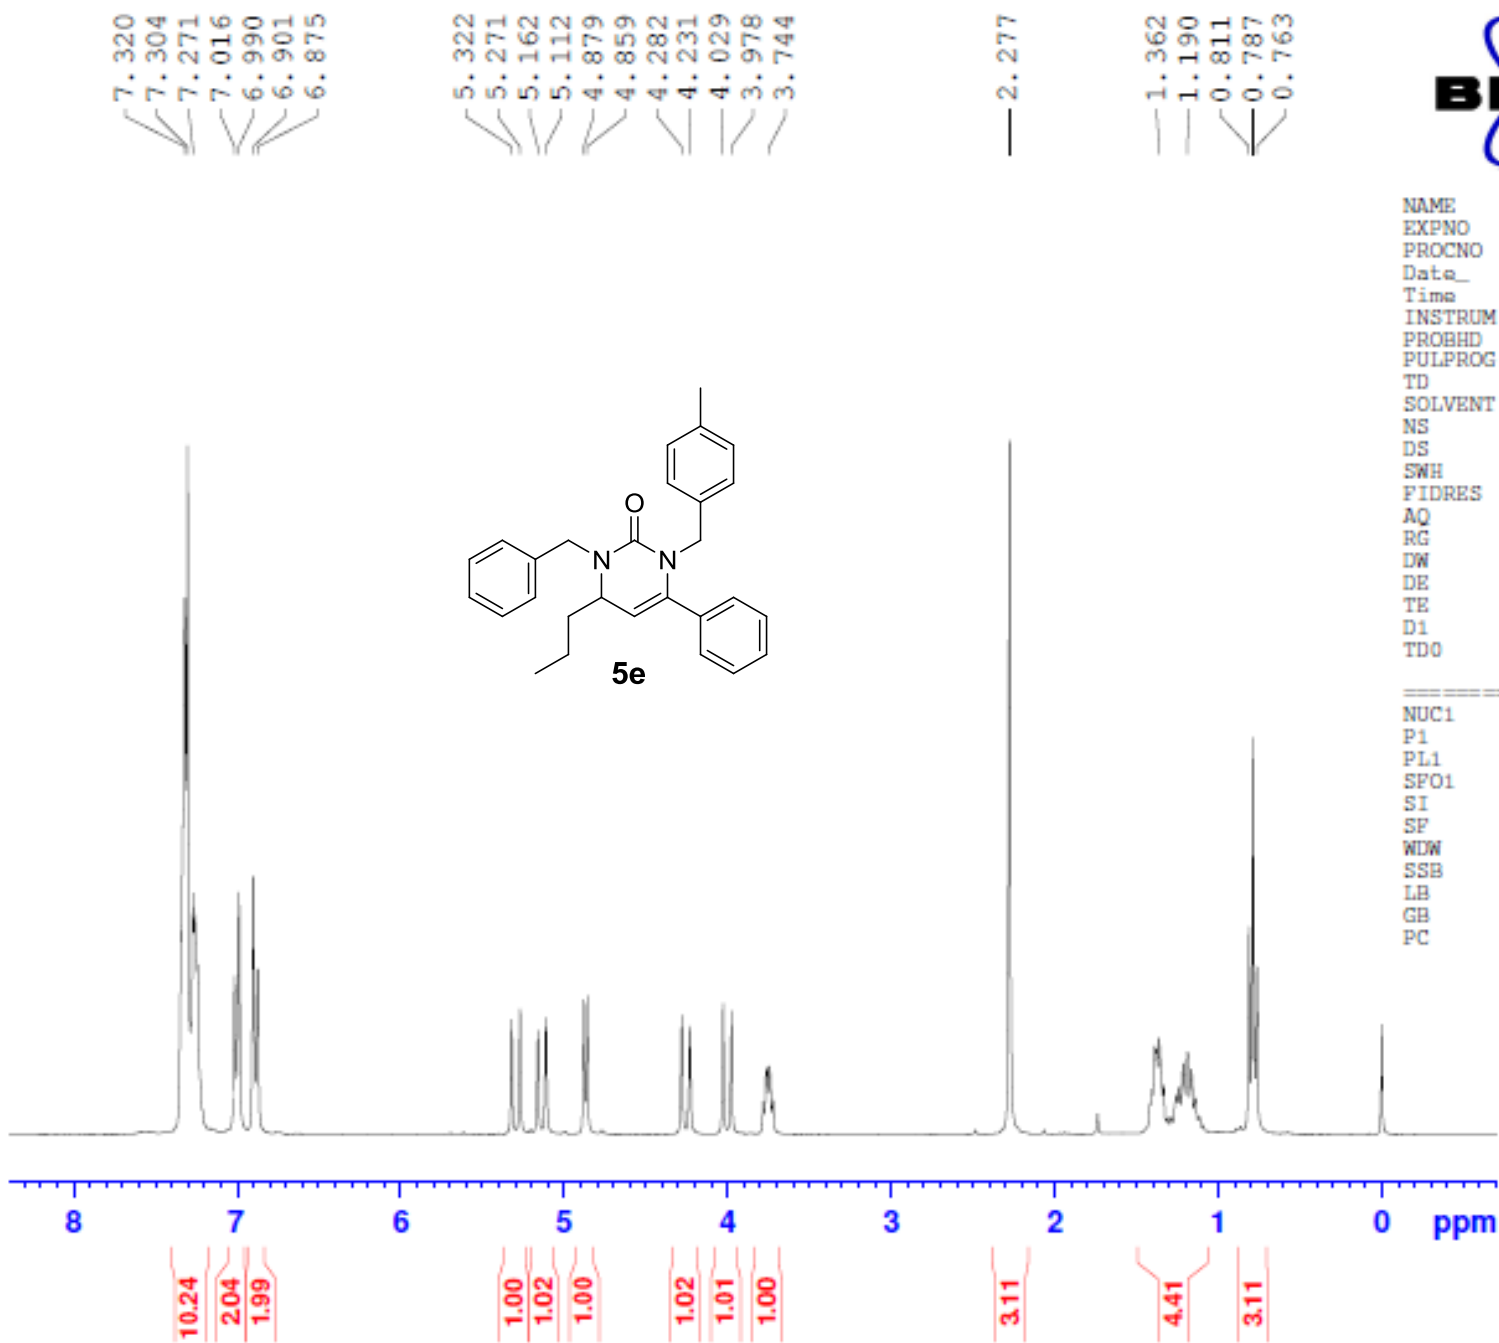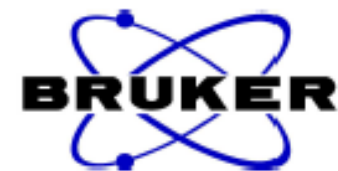

NAME OP332  
EXPNO 10  
PROCNO 1  
Date\_ 20121212  
Time 8.14  
INSTRUM spect  
PROBHD 5 mm BBO BB-1H  
PULPROG zg30  
TD 32768  
SOLVENT CDCl3  
NS 16  
DS 2  
SWH 6172.839 Hz  
FIDRES 0.188380 Hz  
AQ 2.6542580 sec  
RG 181  
DW 81.000 usec  
DE 6.50 usec  
TE 296.7 K  
D1 1.00000000 sec  
TDO 1

===== CHANNEL f1 =====  
NUC1 1H  
P1 9.50 usec  
PL1 0.00 dB  
SFO1 300.1318534 MHz  
SI 32768  
SF 300.1300126 MHz  
WDW EM  
SSB 0  
LB 0.30 Hz  
GB 0  
PC 1.00

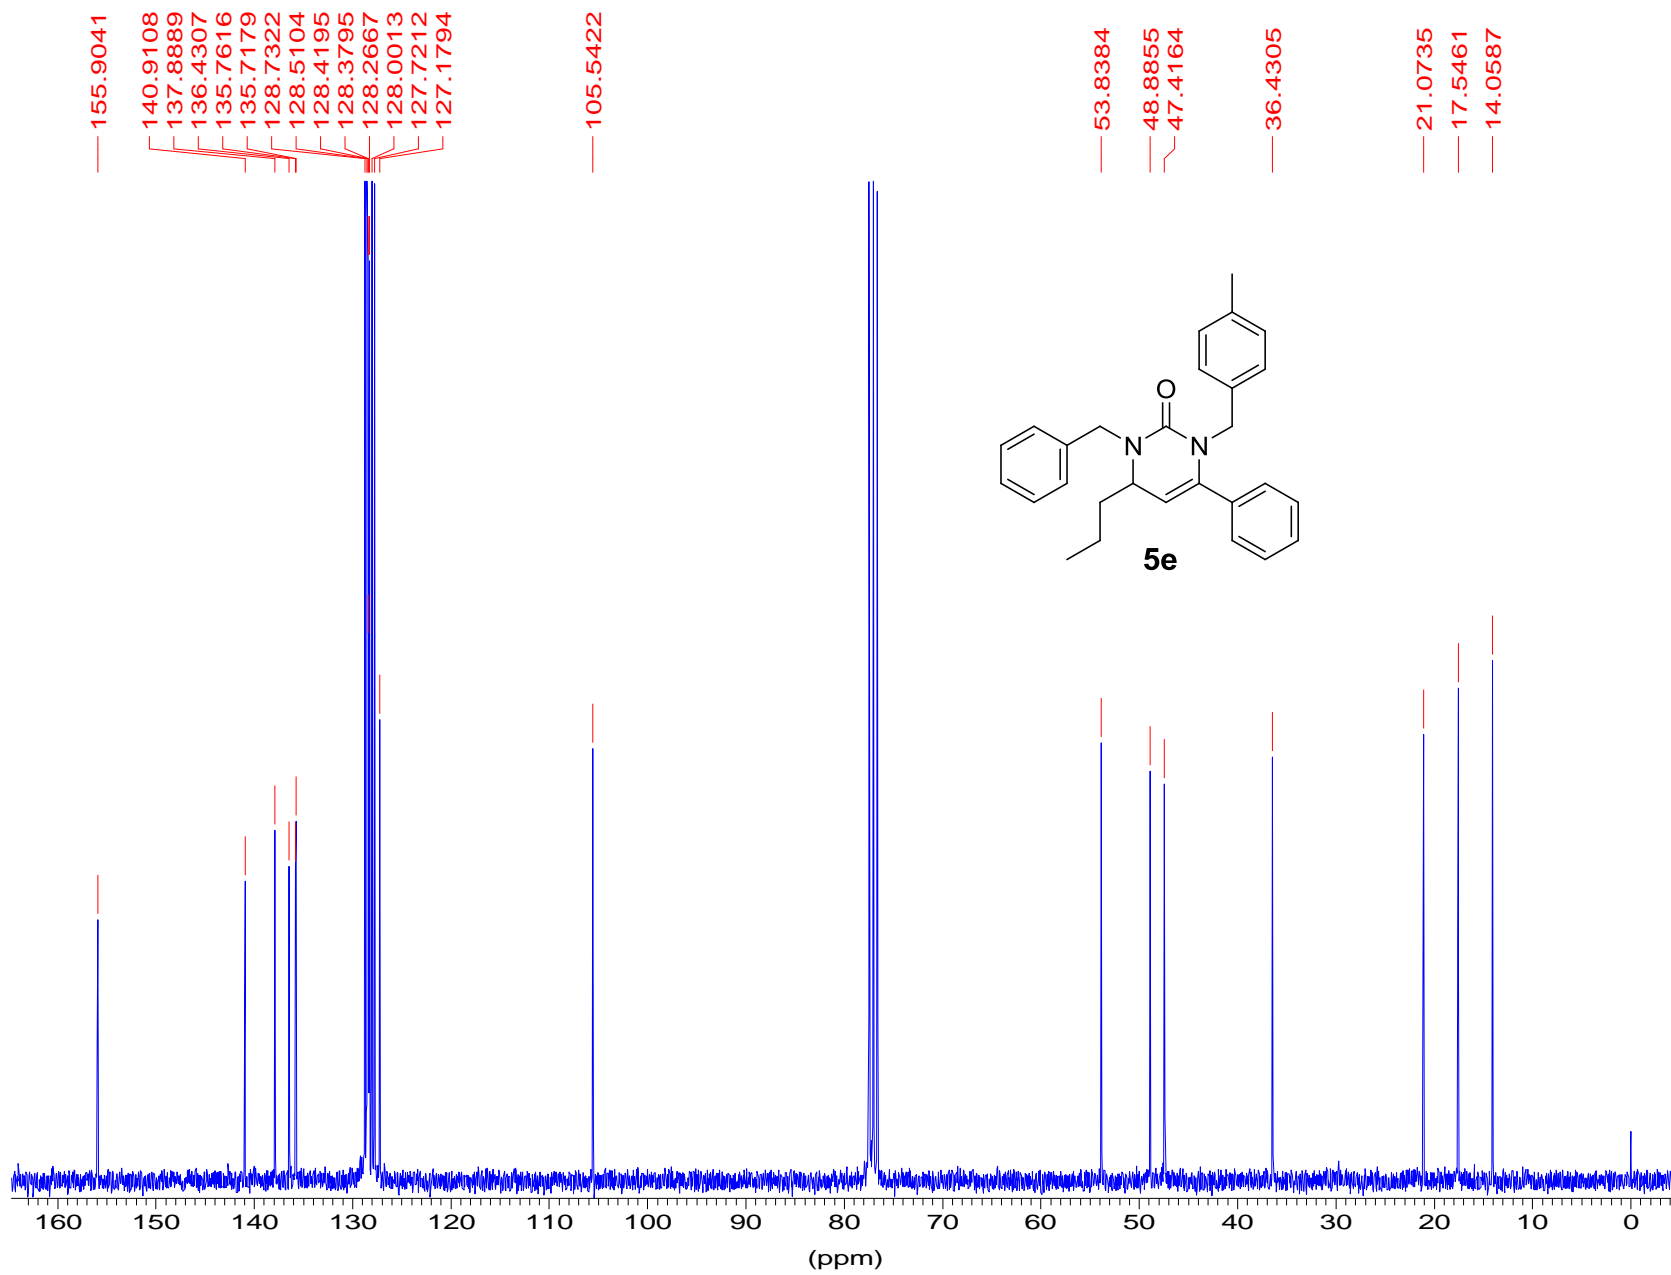

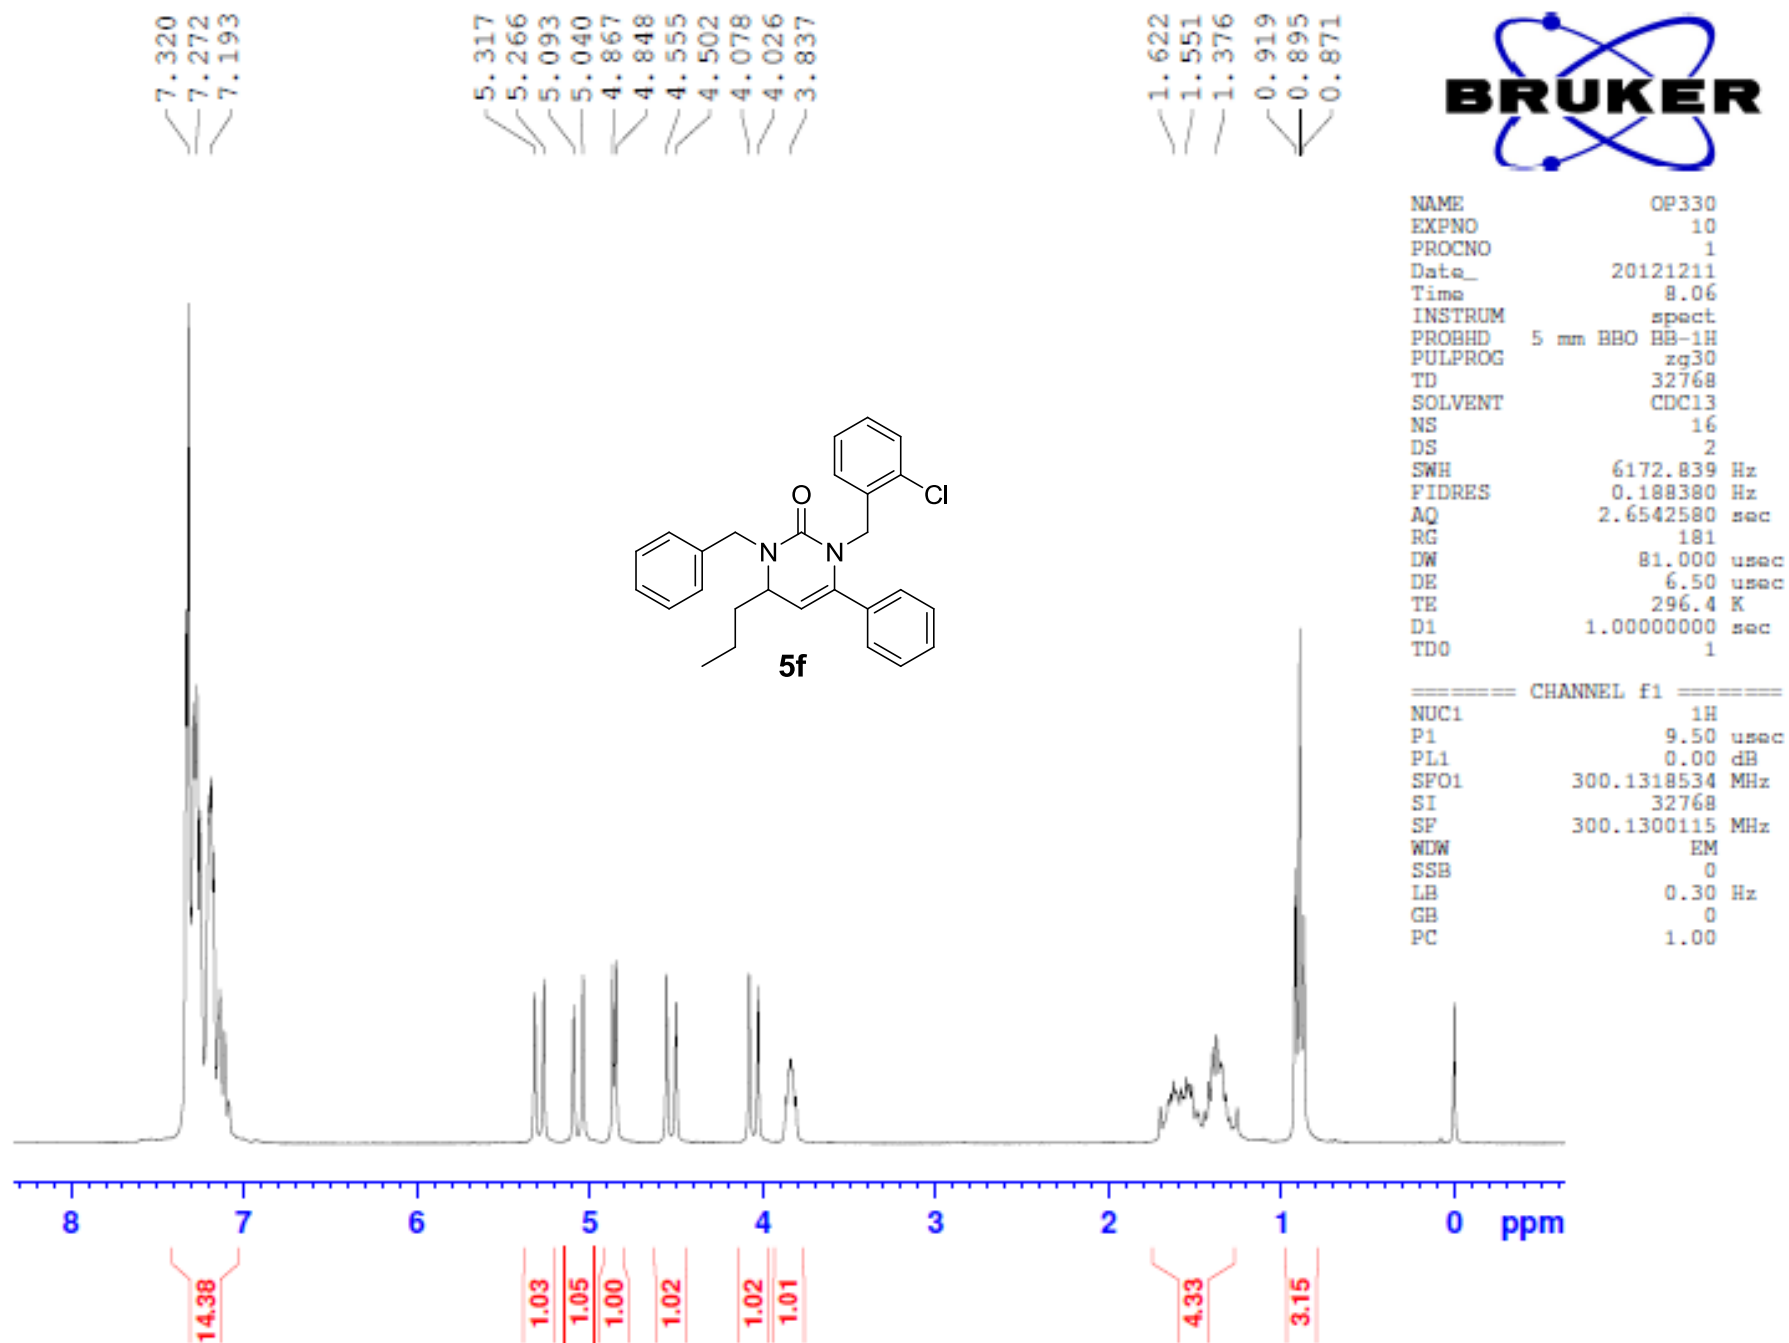

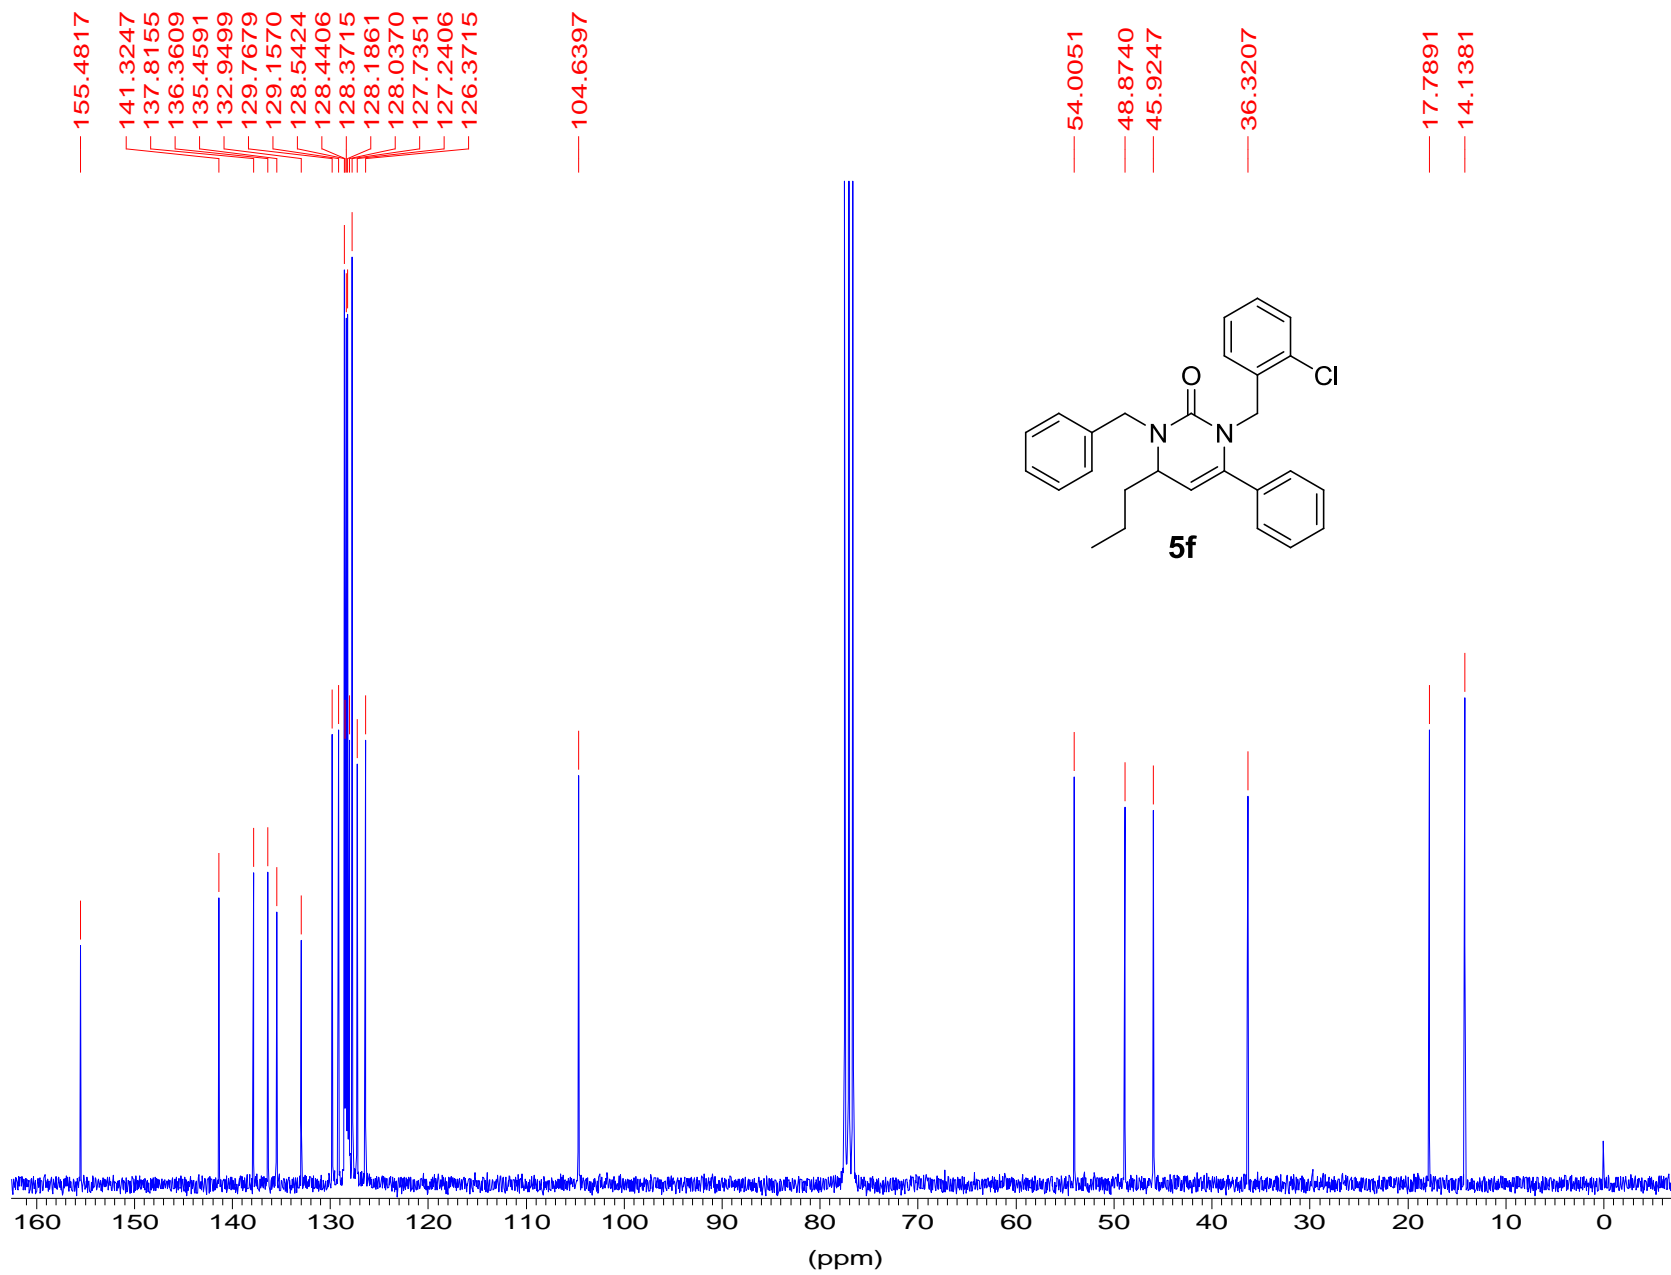

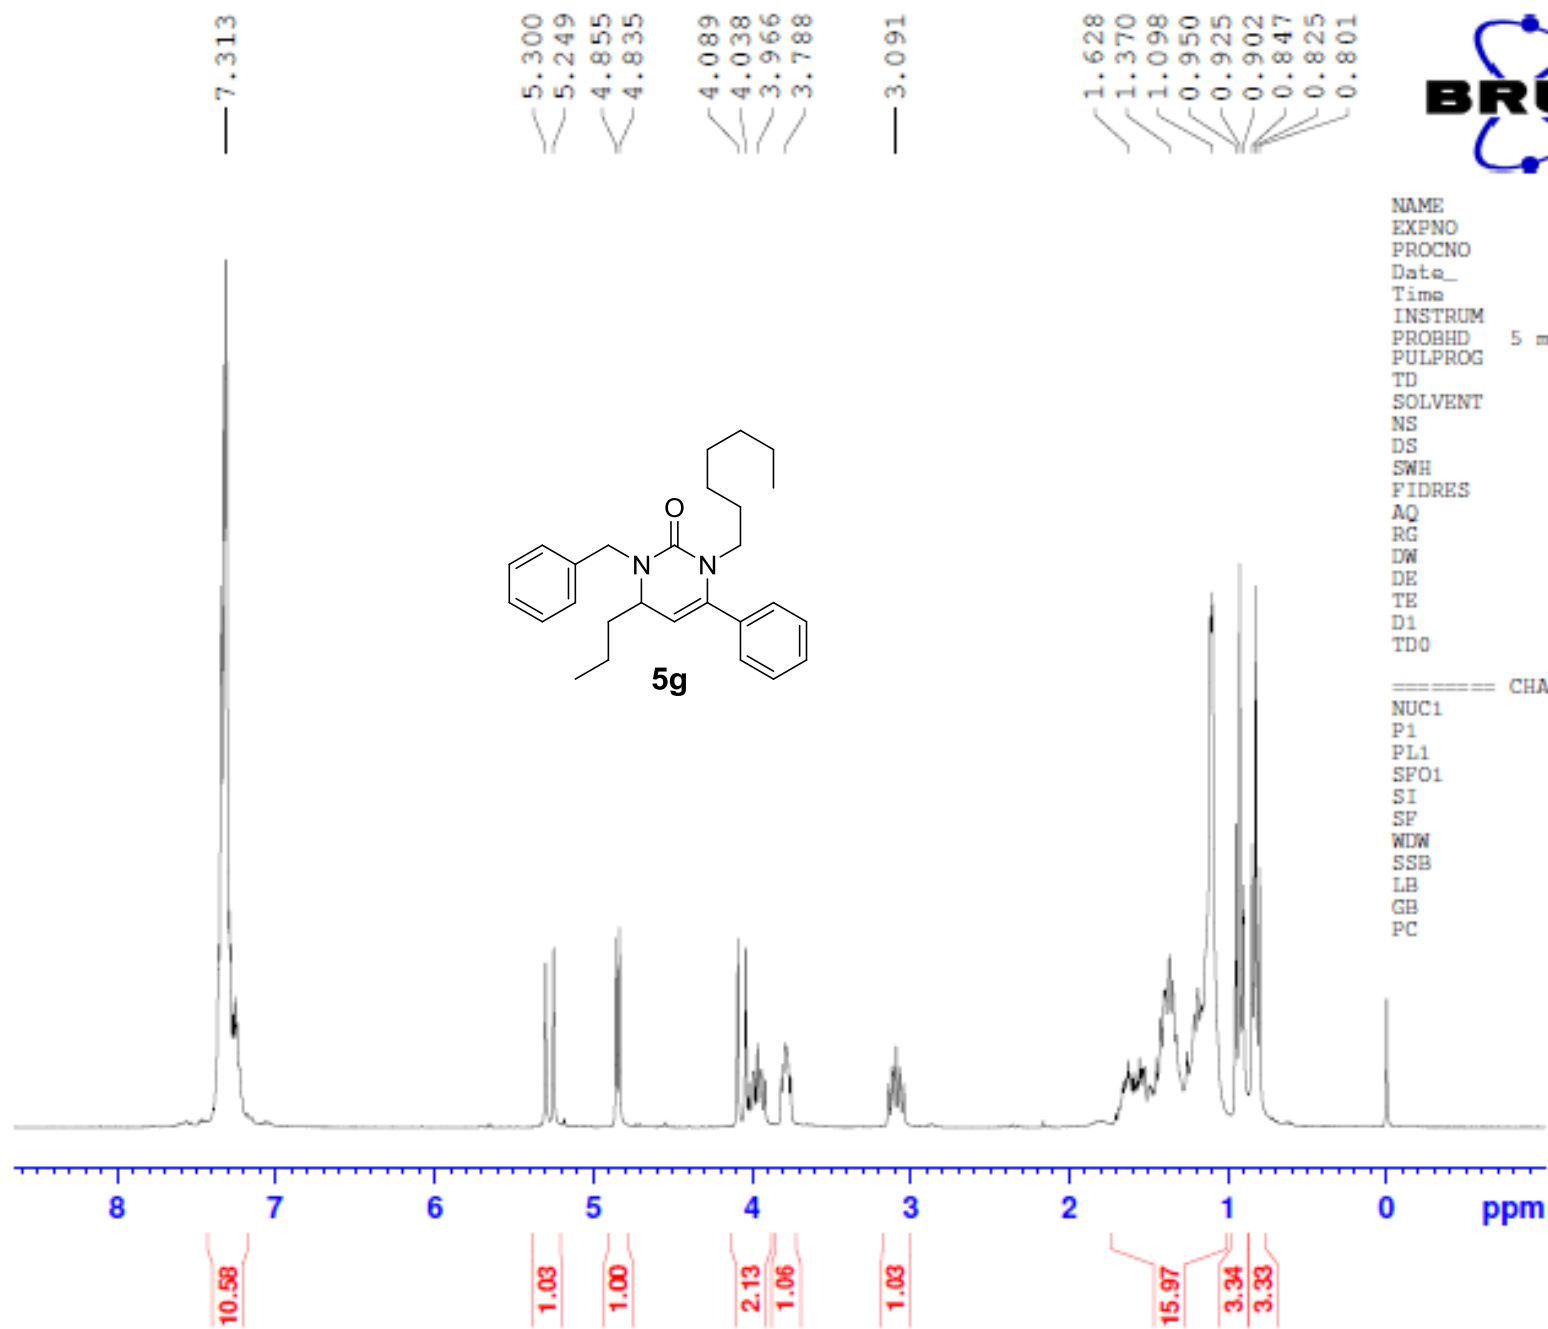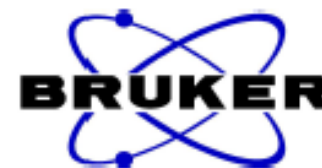

NAME OP329  
EXPNO 40  
PROCNO 1  
Date\_ 20121210  
Time 10.10  
INSTRUM spect  
PROBHD 5 mm BBO BB-1H  
PULPROG zg30  
TD 32768  
SOLVENT CDCl3  
NS 16  
DS 2  
SWH 6172.839 Hz  
FIDRES 0.188380 Hz  
AQ 2.6542580 sec  
RG 128  
DW 81.000 usec  
DE 6.50 usec  
TE 296.3 K  
D1 1.00000000 sec  
TDO 1

===== CHANNEL f1 =====  
NUC1 1H  
P1 9.50 usec  
PL1 0.00 dB  
SFO1 300.1318534 MHz  
SI 32768  
SF 300.1300079 MHz  
WDW EM  
SSB 0  
LB 0.30 Hz  
GB 0  
PC 1.00

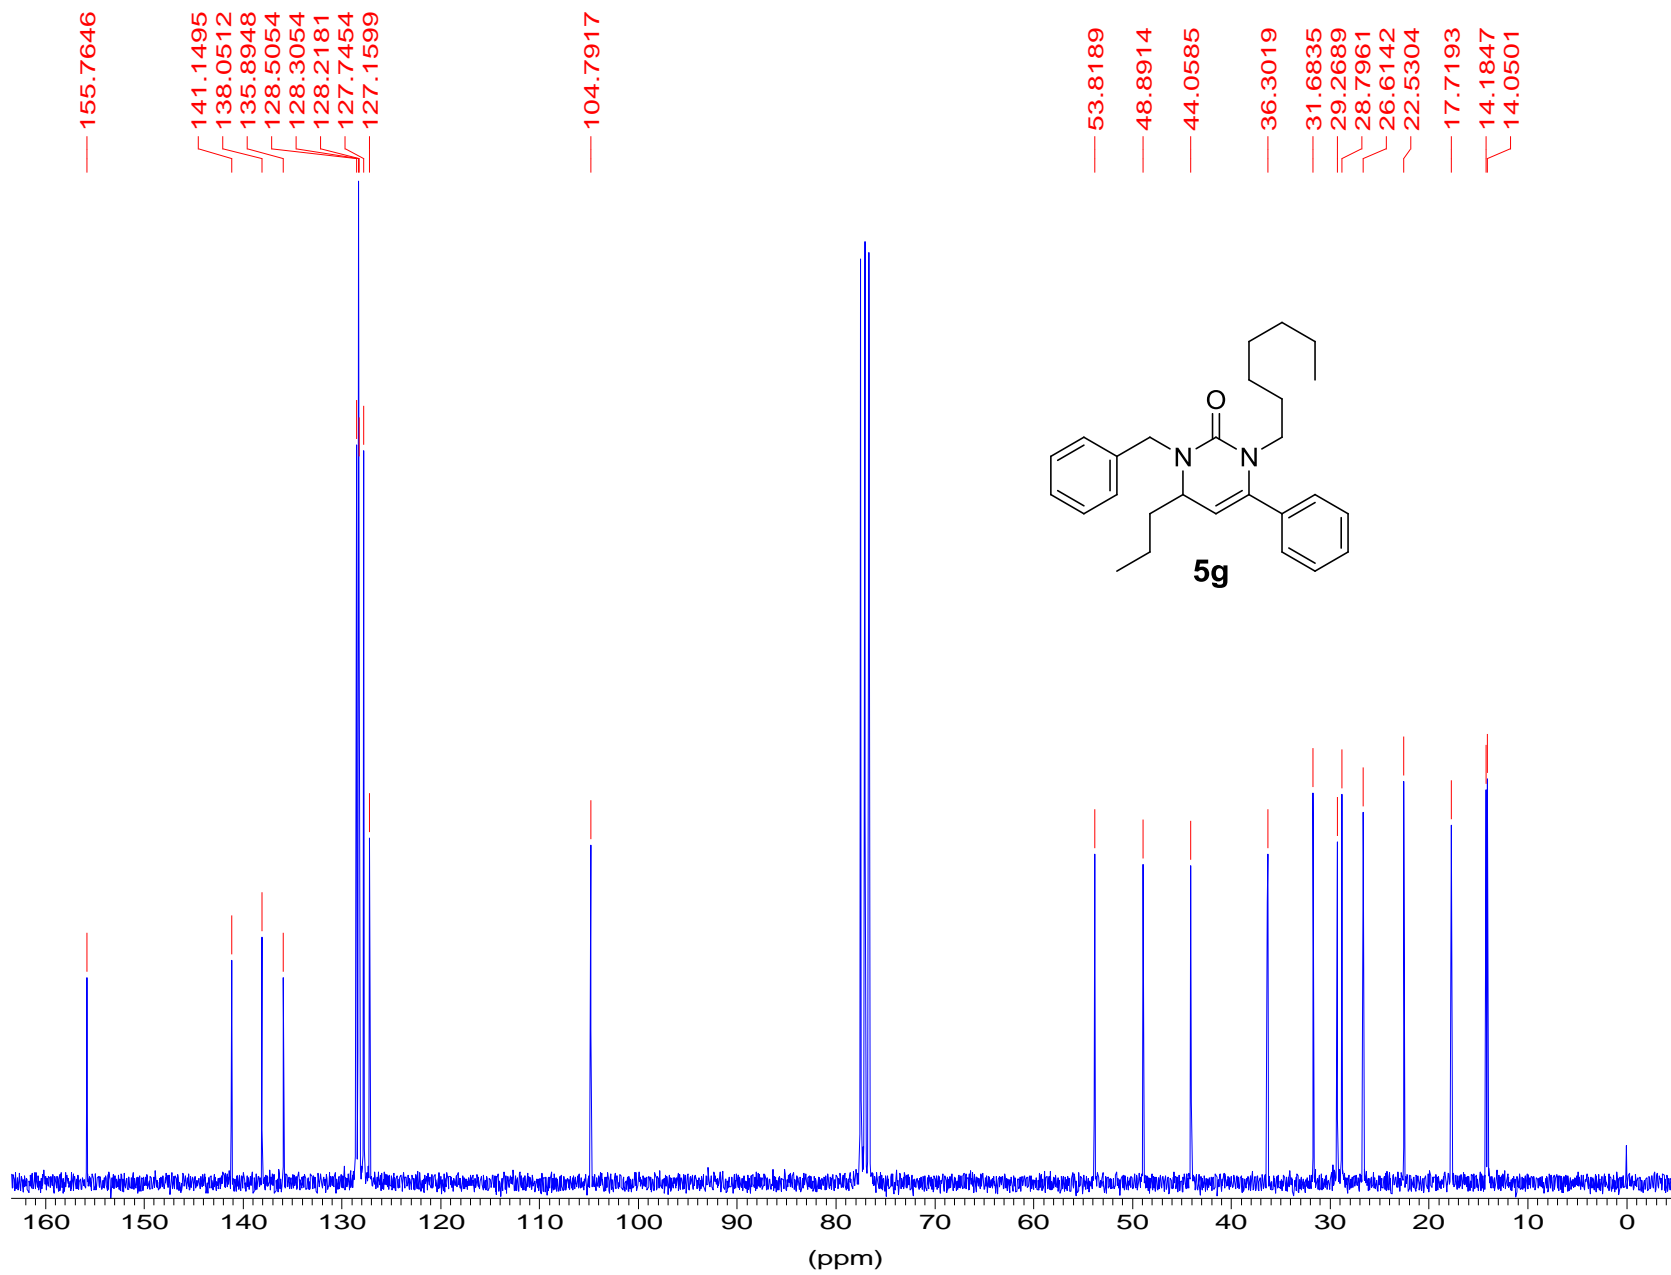

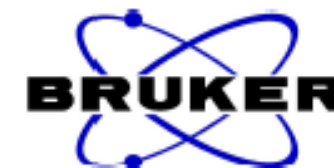

```
NAME          OP343up
EXPNO         10
PROCNO        1
Date_         20130130
Time          8.40
INSTRUM       spect
PROBHD        5 mm BBO HB-1H
PULPROG       zg30
TD            32768
SOLVENT       CDCl3
NS            16
DS            2
SWH           6172.839 Hz
FIDRES        0.188380 Hz
AQ            2.6542580 sec
RG            512
DW            81.000 usec
DE            6.50 usec
TE            296.4 K
D1            1.00000000 sec
TD0           1
```

```
===== CHANNEL f1 =====
NUC1          1H
P1            9.50 usec
PL1           0.00 dB
SFO1          300.1318534 MHz
SI            32768
SF            300.1300095 MHz
WDW           EM
SSB           0
LB            0.30 Hz
GB            0
PC            1.00
```

7.374  
7.298  
7.259

5.280  
5.229  
4.903  
4.881

4.052  
4.000  
3.684  
3.593

2.417  
2.039  
1.795  
1.410  
0.939  
0.915  
0.893

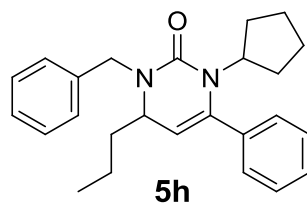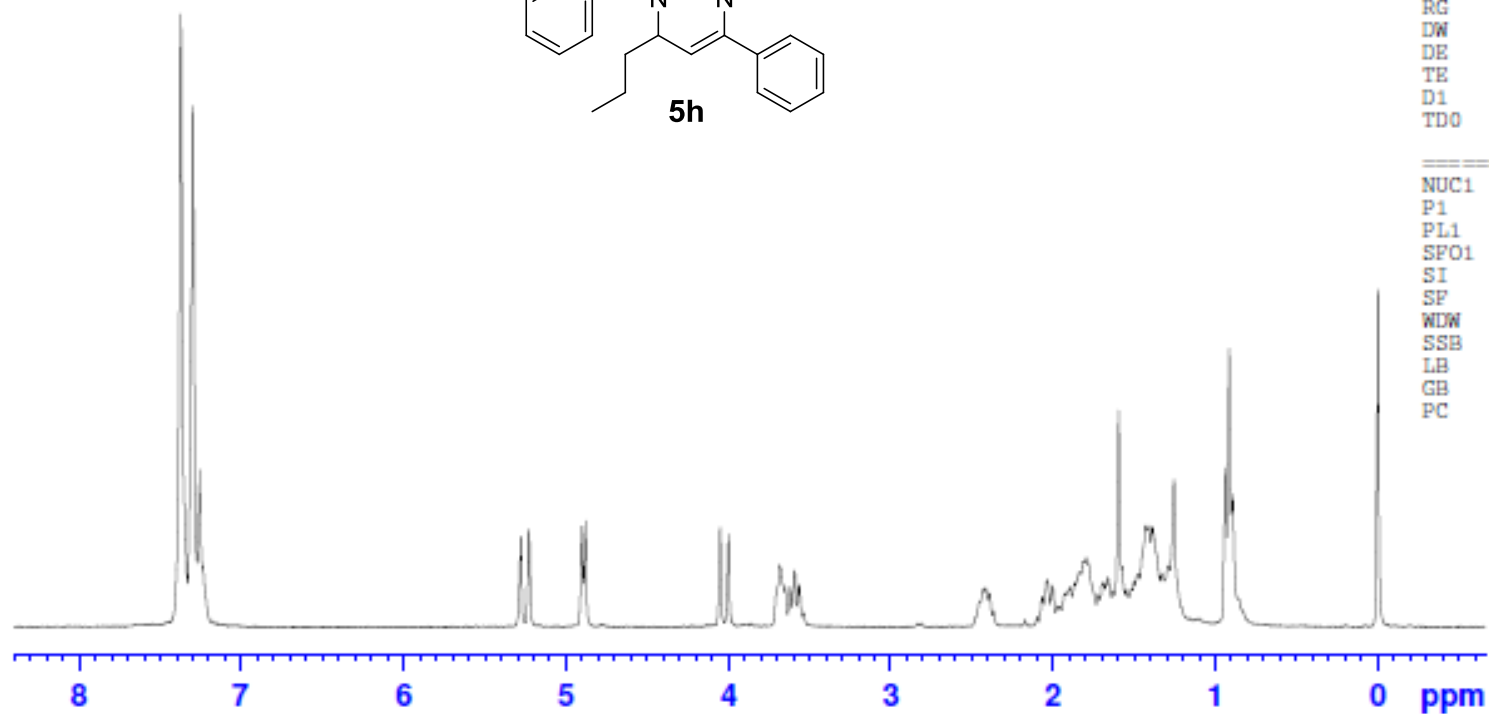

10.77

1.05

1.00

1.03

2.05

1.04

14.64

3.36



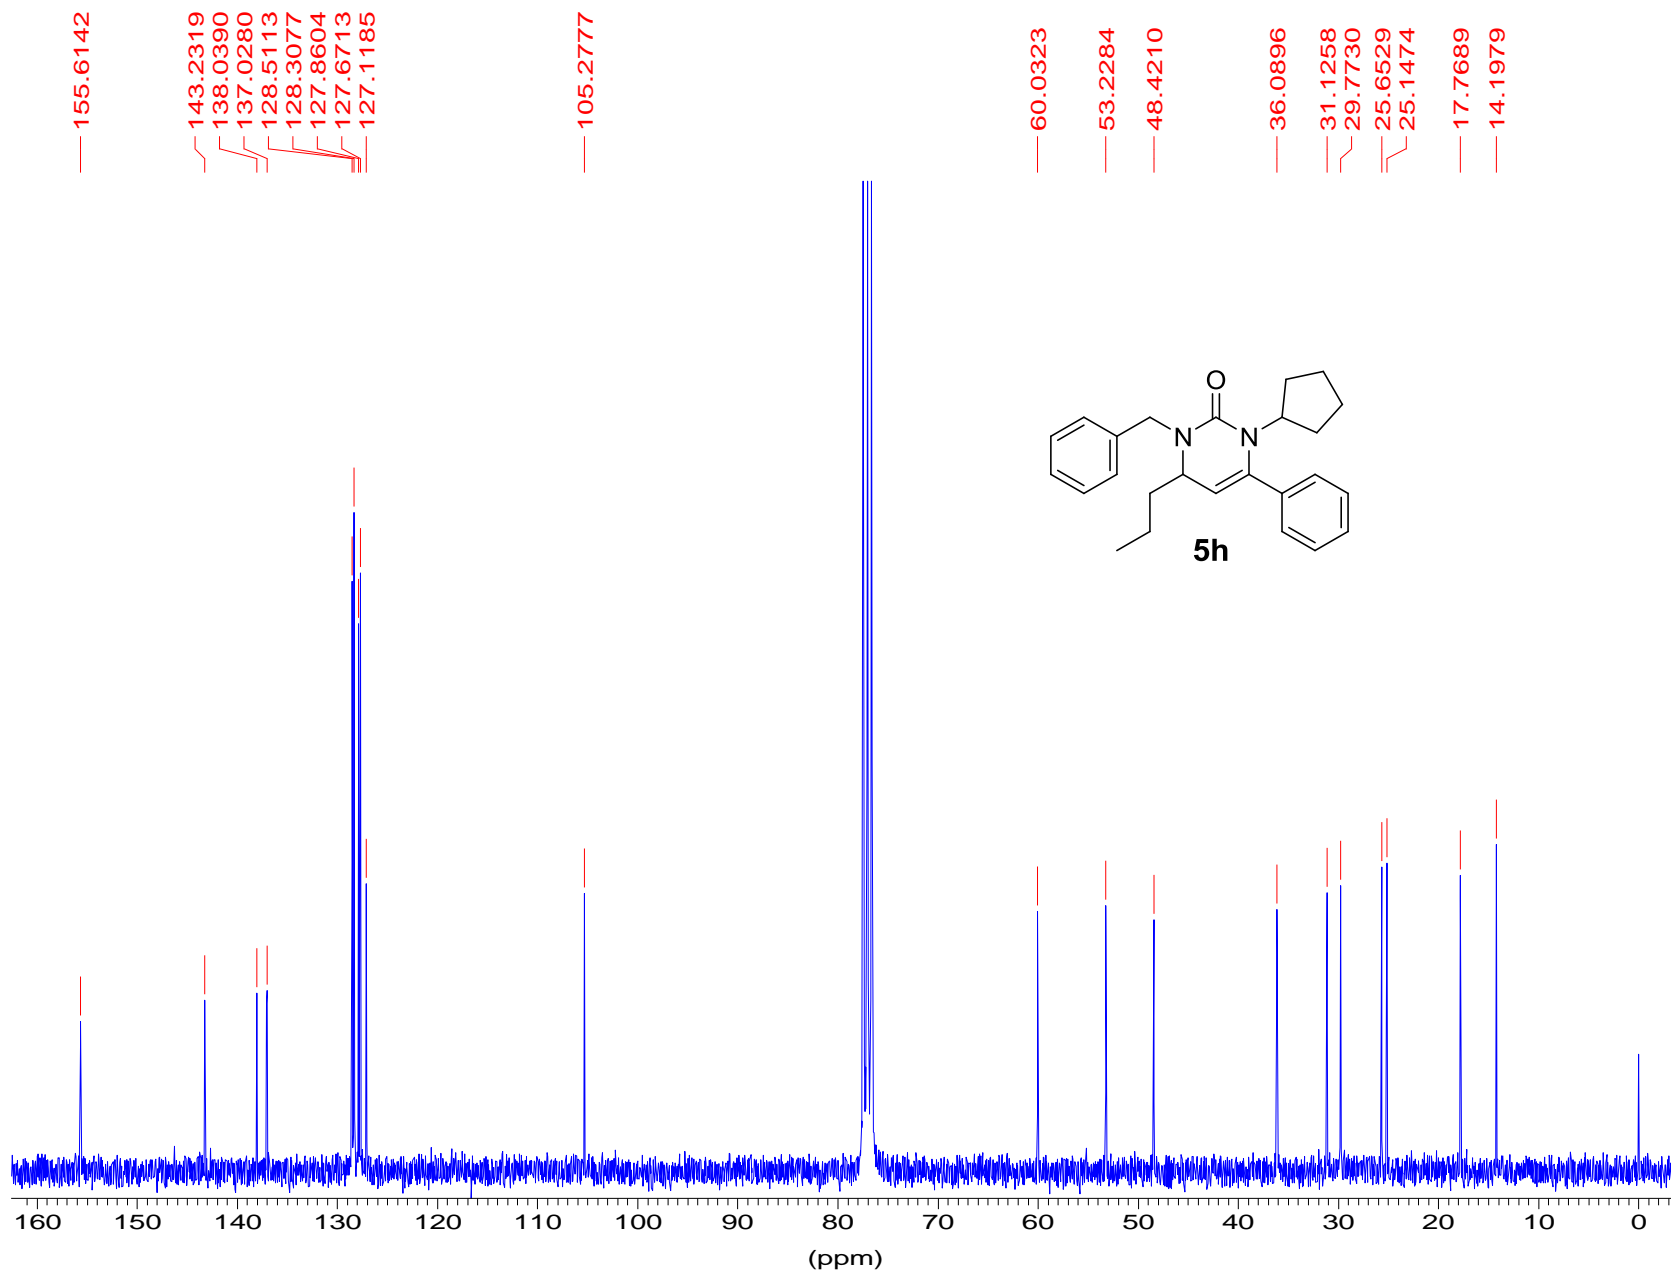

7.324  
7.297  
7.232  
7.105  
6.970  
6.890  
6.863  
6.737

5.235  
5.214  
5.200  
5.149

4.098  
4.047  
3.906  
3.801

1.754  
1.606  
1.038  
1.014  
0.990

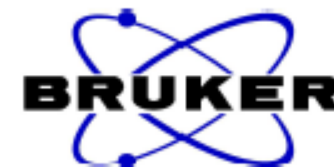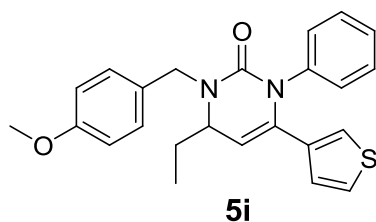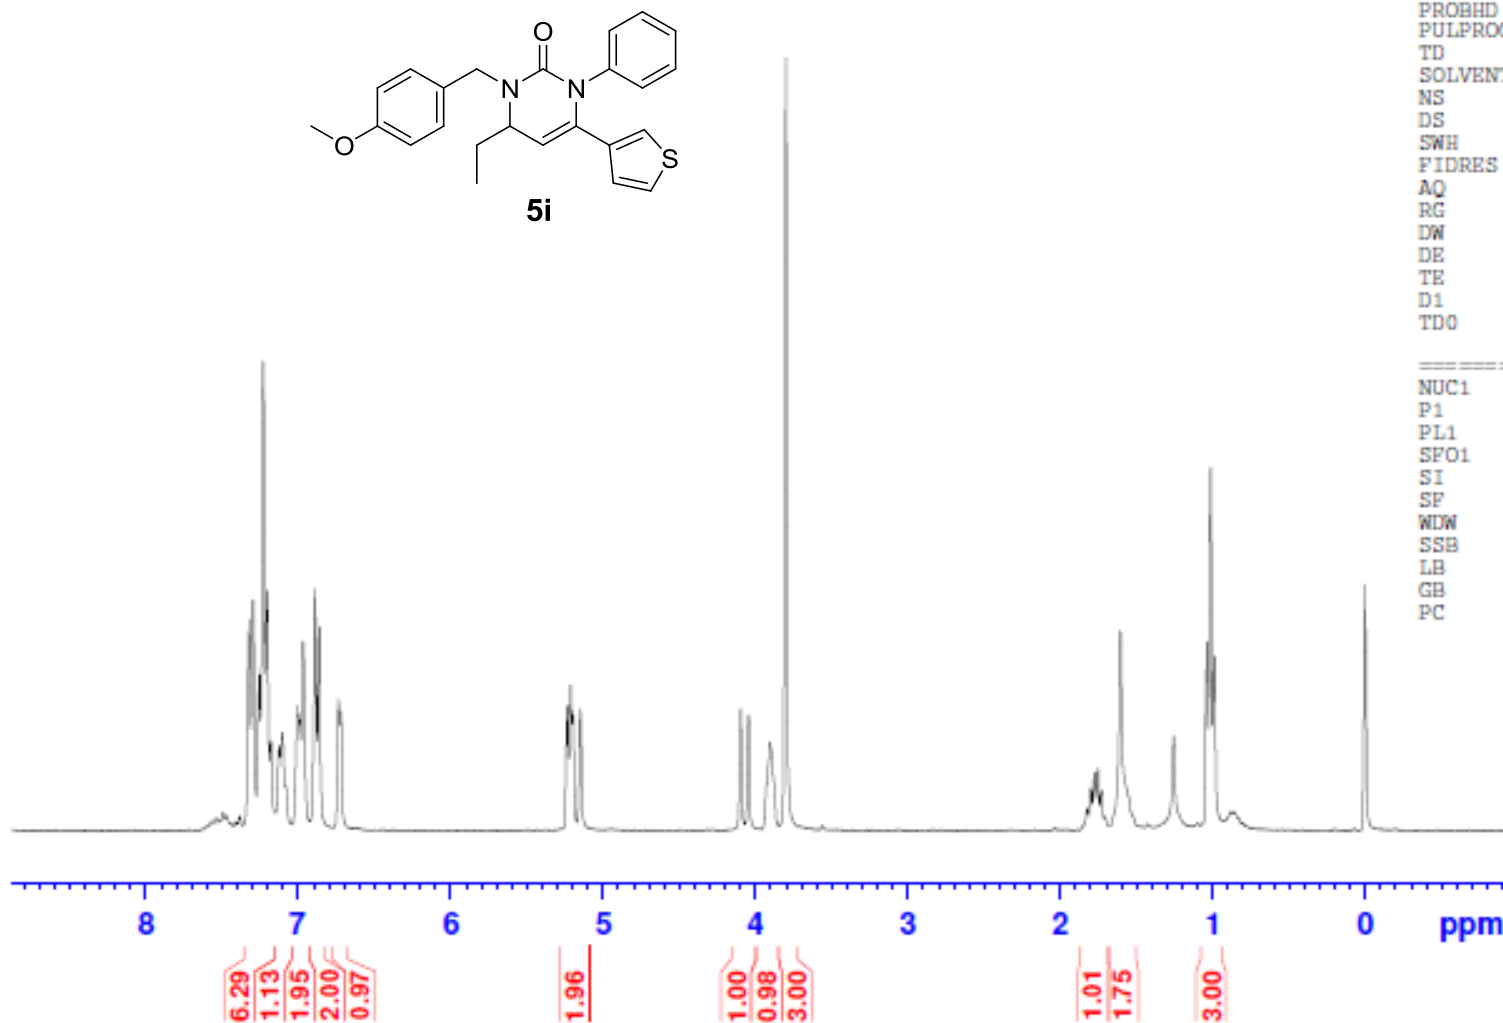

```
NAME          OP312
EXPNO         10
PROCNO        1
Date_         20121120
Time          9.04
INSTRUM       spect
PROBHD        5 mm BBO BB-1H
PULPROG       zg30
TD            32768
SOLVENT       CDCl3
NS            16
DS            2
SWH           6172.839 Hz
FIDRES        0.188380 Hz
AQ            2.6542580 sec
RG            456.1
DW            81.000 usec
DE            6.50 usec
TE            296.2 K
D1            1.00000000 sec
TD0           1
```

```
===== CHANNEL f1 =====
NUC1          1H
P1            9.50 usec
PL1           0.00 dB
SFO1          300.1318534 MHz
SI            32768
SF            300.1300099 MHz
WDW           EM
SSB           0
LB            0.30 Hz
GB            0
PC            1.00
```

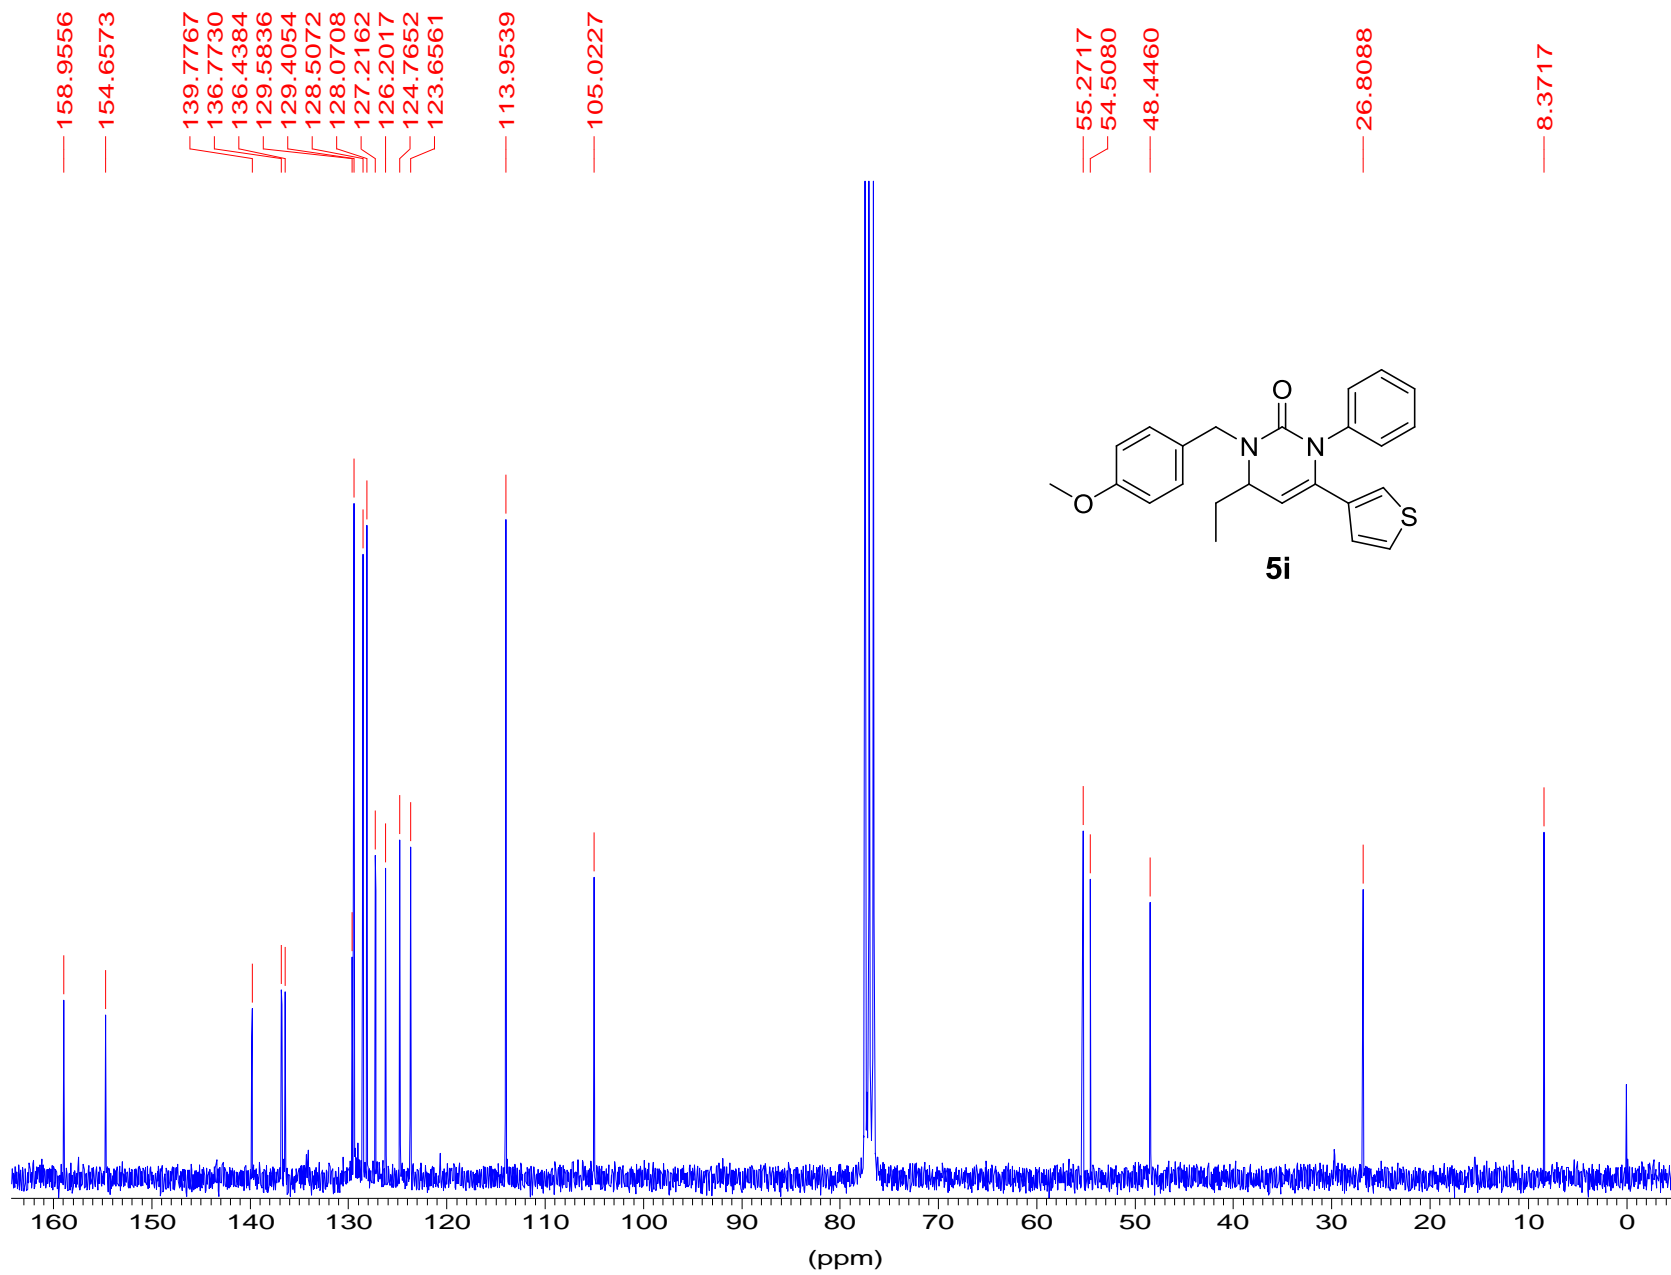

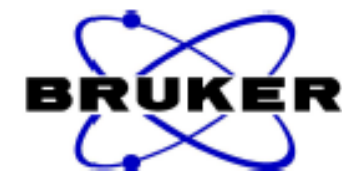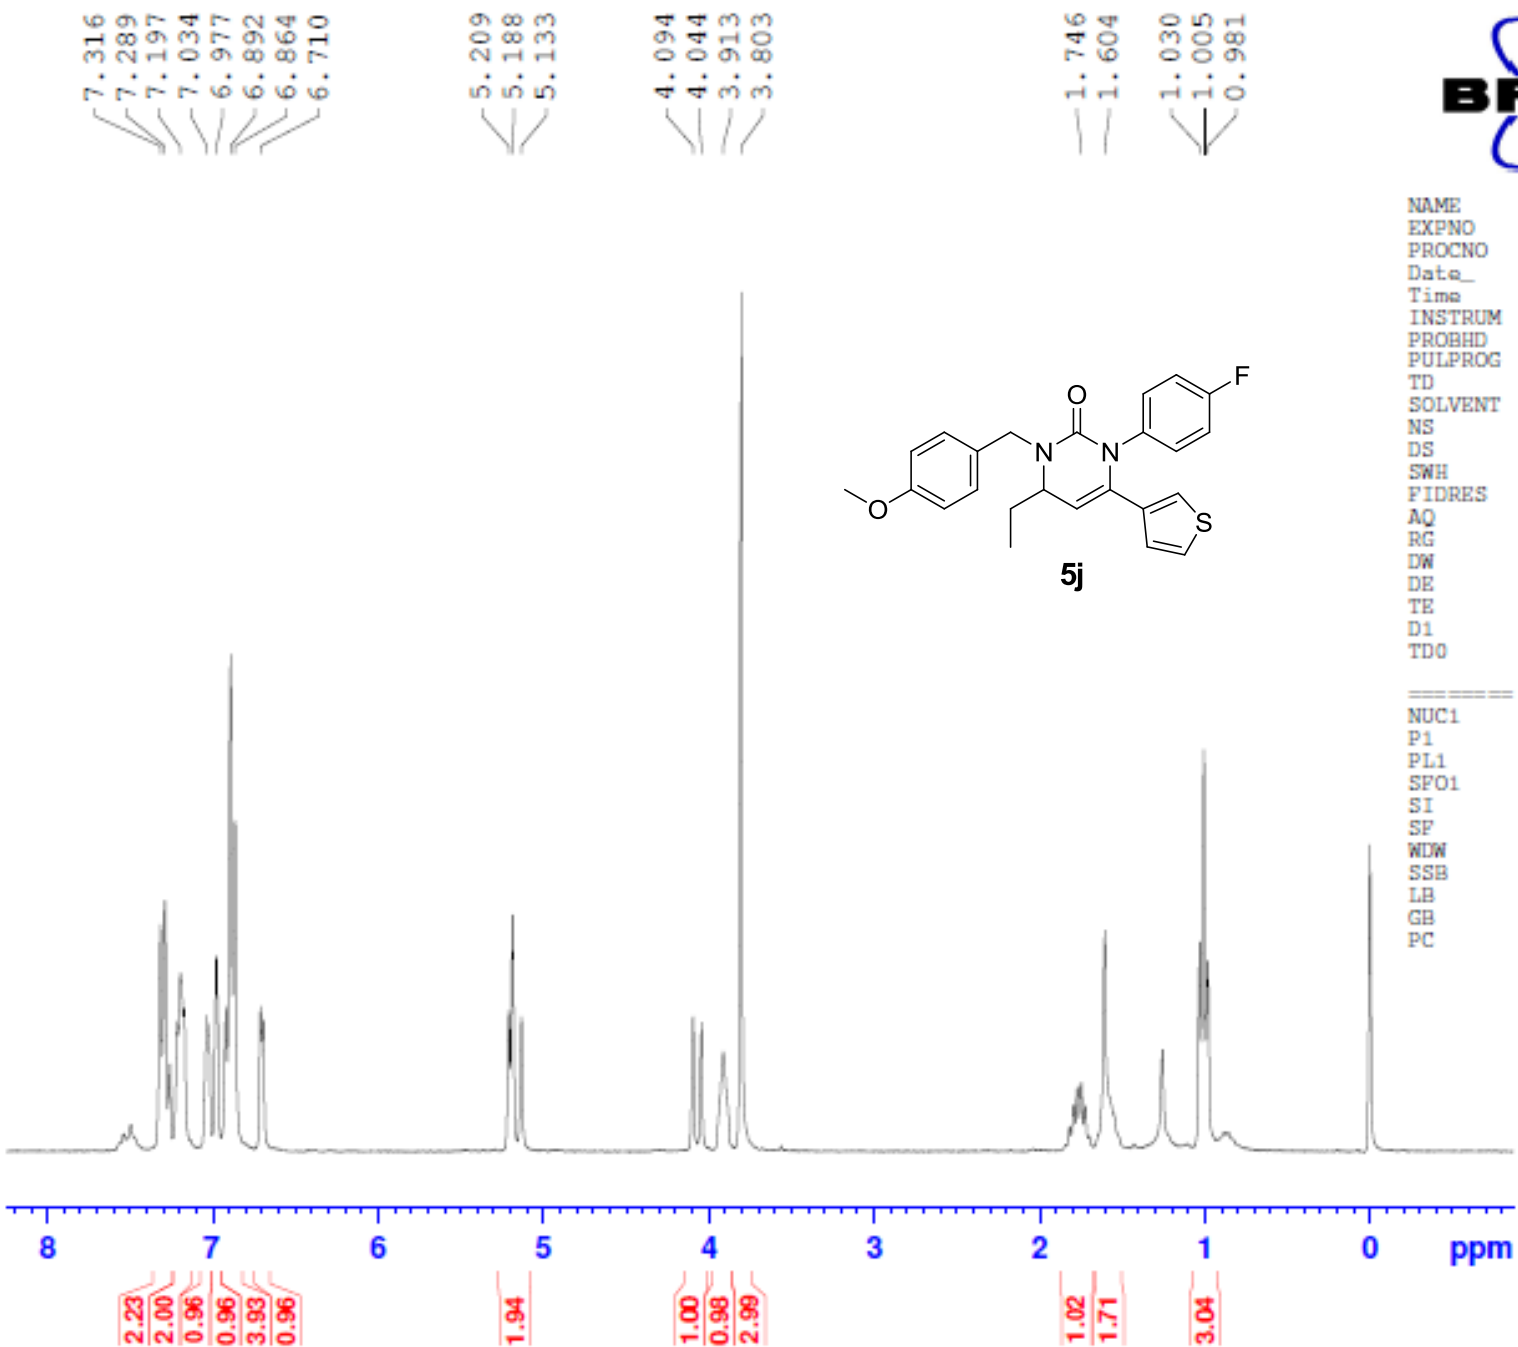

```
NAME          OP313
EXPNO         10
PROCNO        1
Date_         20121120
Time          8.34
INSTRUM       spect
PROBHD        5 mm BBO BB-1H
PULPROG       zg30
TD            32768
SOLVENT       CDCl3
NS            16
DS            2
SWH           6172.839 Hz
FIDRES        0.188380 Hz
AQ            2.6542580 sec
RG            456.1
DW            81.000 usec
DE            6.50 usec
TE            296.2 K
D1            1.00000000 sec
TD0           1
```

```
===== CHANNEL f1 =====
NUC1          1H
P1            9.50 usec
PL1           0.00 dB
SFO1         300.1318534 MHz
SI           32768
SF           300.1300094 MHz
WDW           EM
SSB           0
LB            0.30 Hz
GB            0
PC            1.00
```

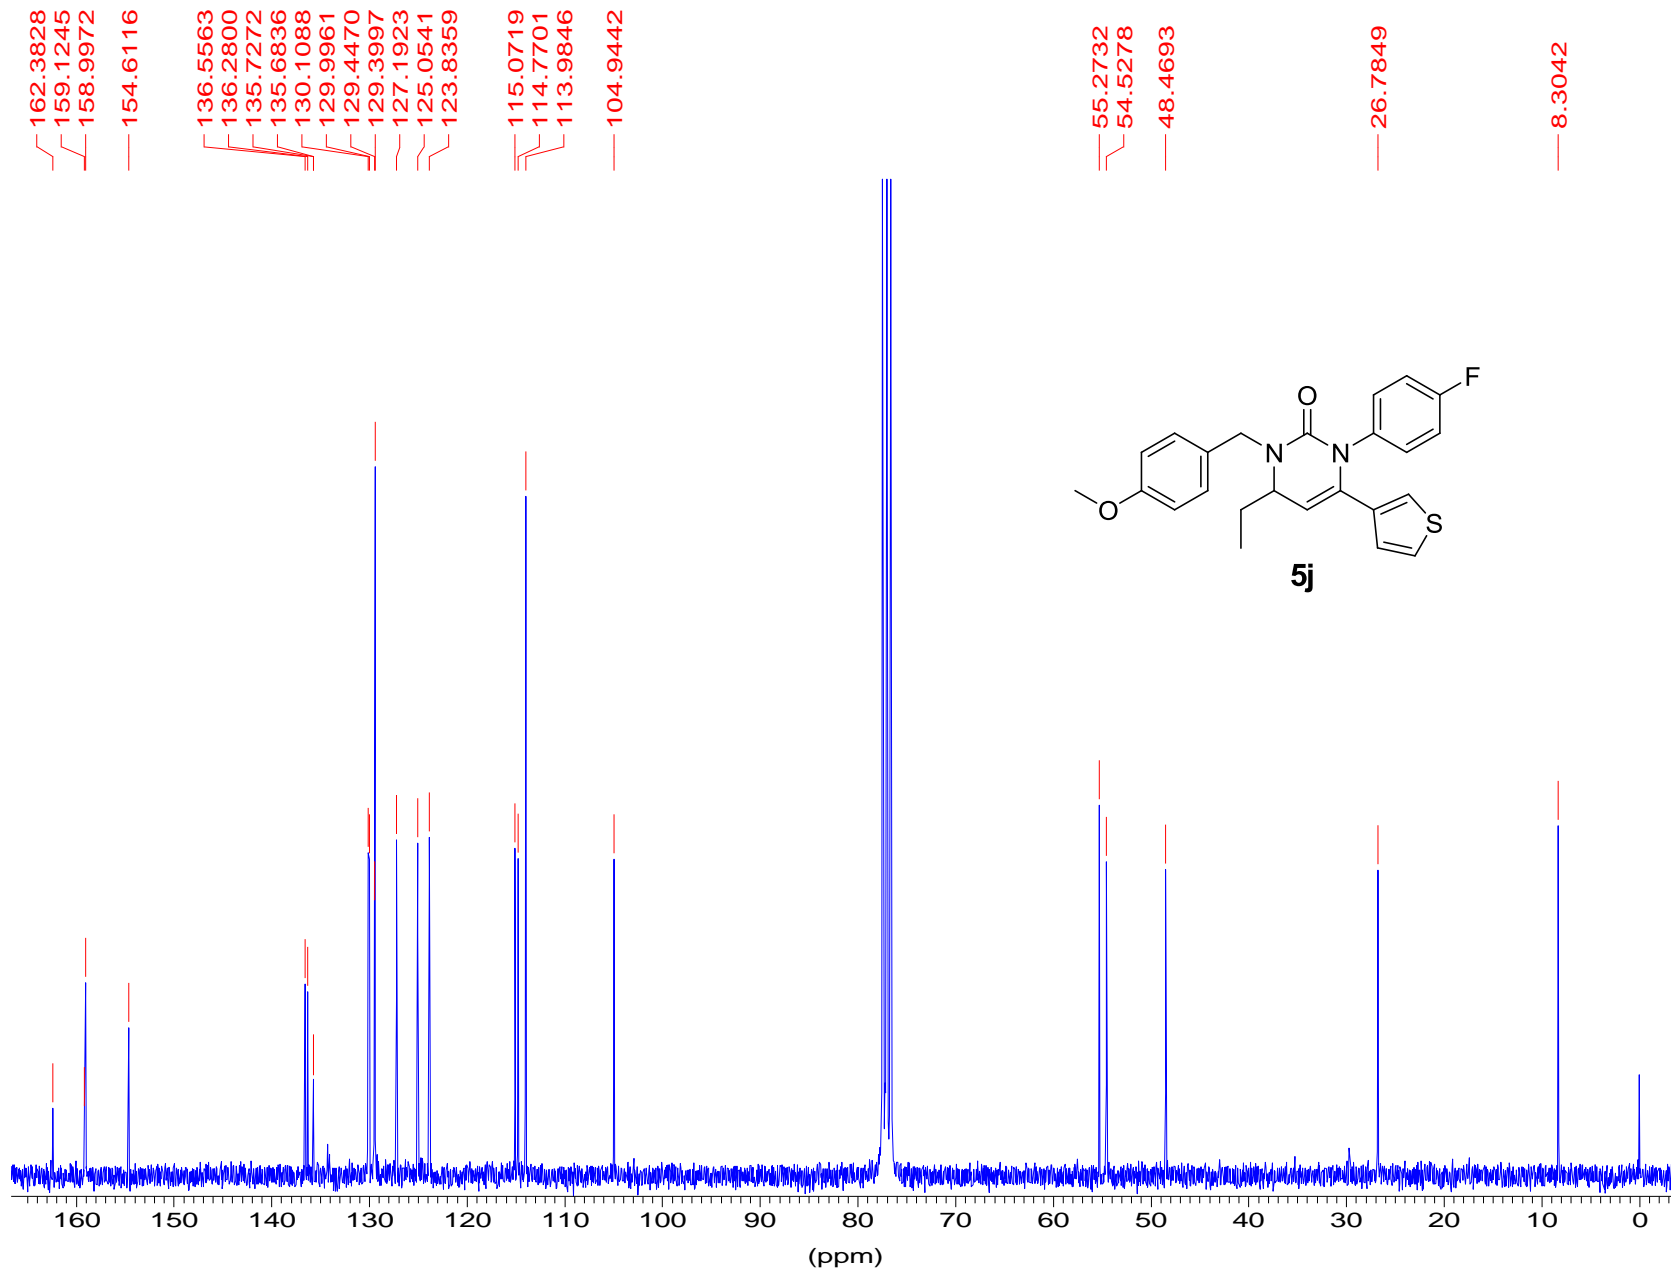

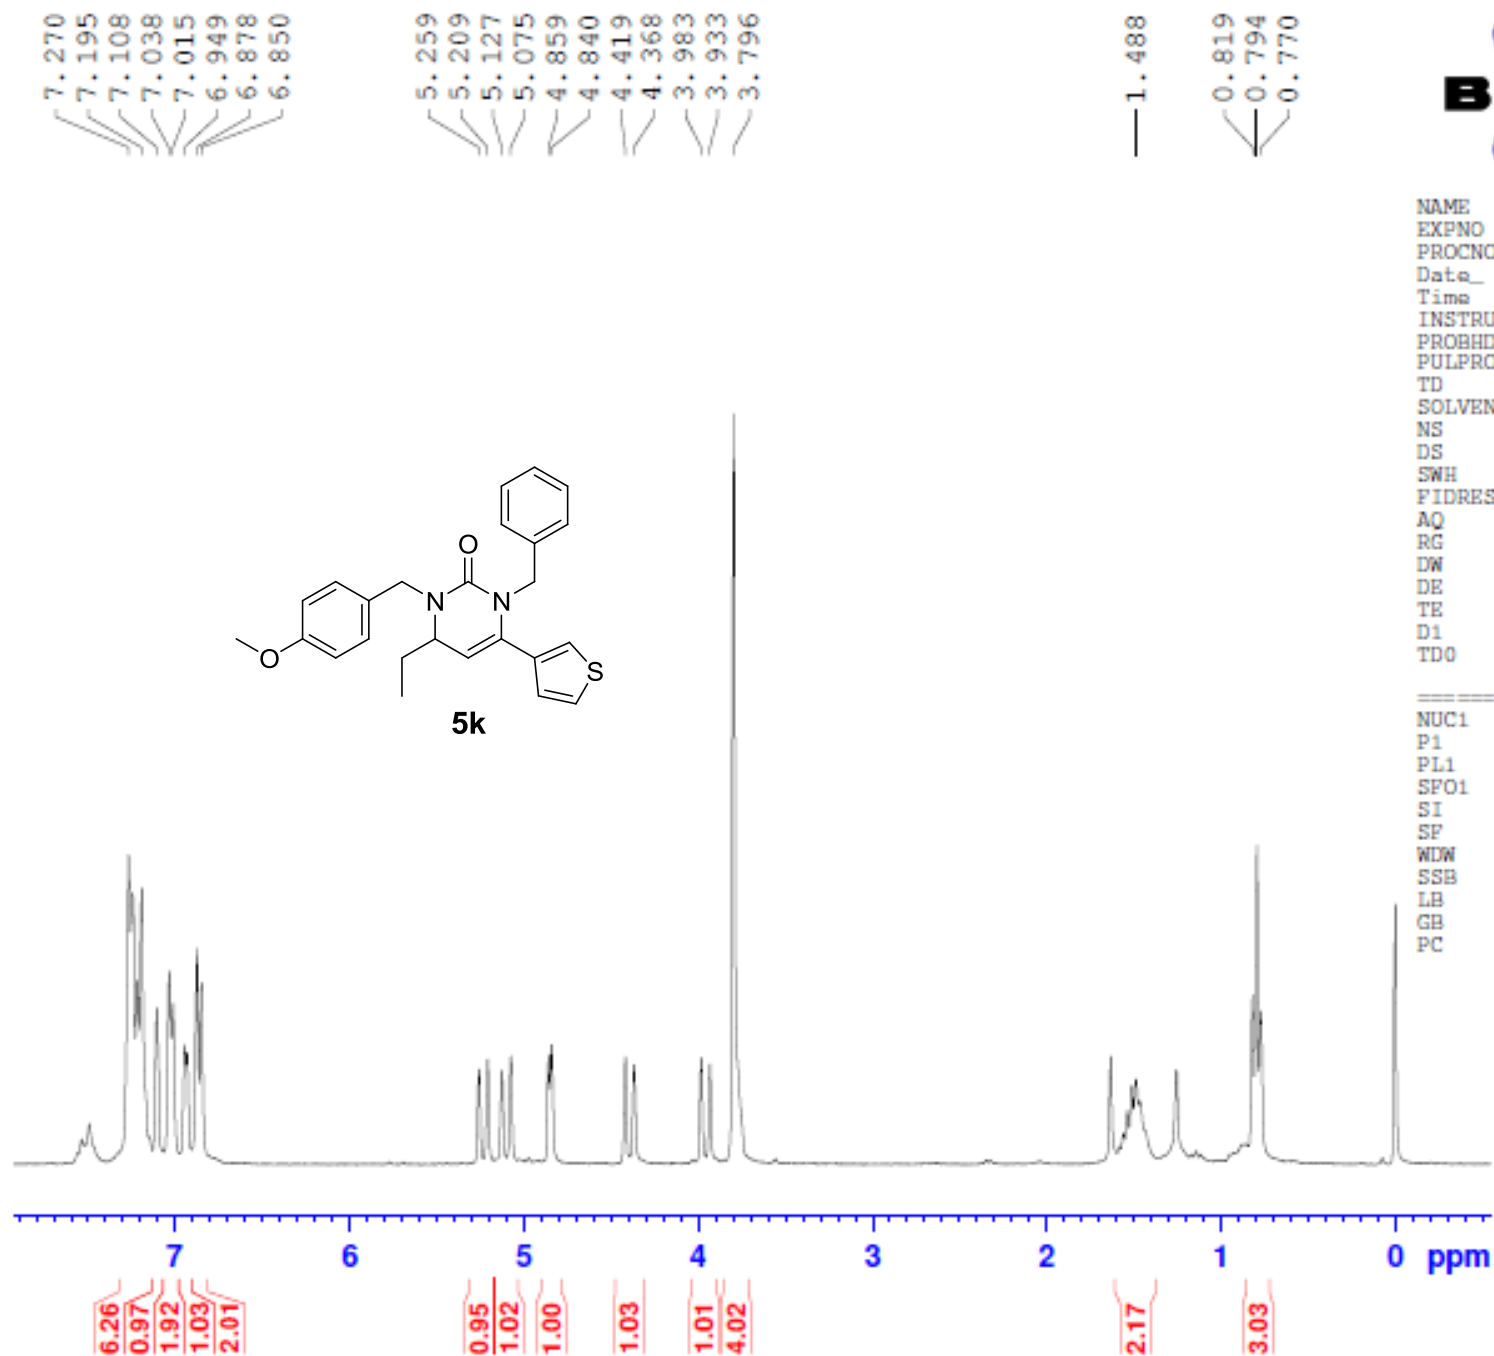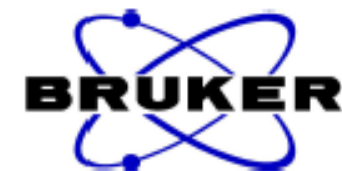

NAME OP310r  
EXPNO 20  
PROCNO 1  
Date\_ 20121121  
Time 4.24  
INSTRUM spect  
PROBHD 5 mm BBO BB-1H  
PULPROG zg30  
TD 32768  
SOLVENT CDCl3  
NS 16  
DS 2  
SWH 6172.839 Hz  
FIDRES 0.188380 Hz  
AQ 2.6542580 sec  
RG 362  
DW 81.000 usec  
DE 6.50 usec  
TE 296.2 K  
D1 1.00000000 sec  
TD0 1

===== CHANNEL f1 =====  
NUC1 1H  
P1 9.50 usec  
PL1 0.00 dB  
SFO1 300.1318534 MHz  
SI 32768  
SF 300.1300098 MHz  
WDW EM  
SSB 0  
LB 0.30 Hz  
GB 0  
PC 1.00

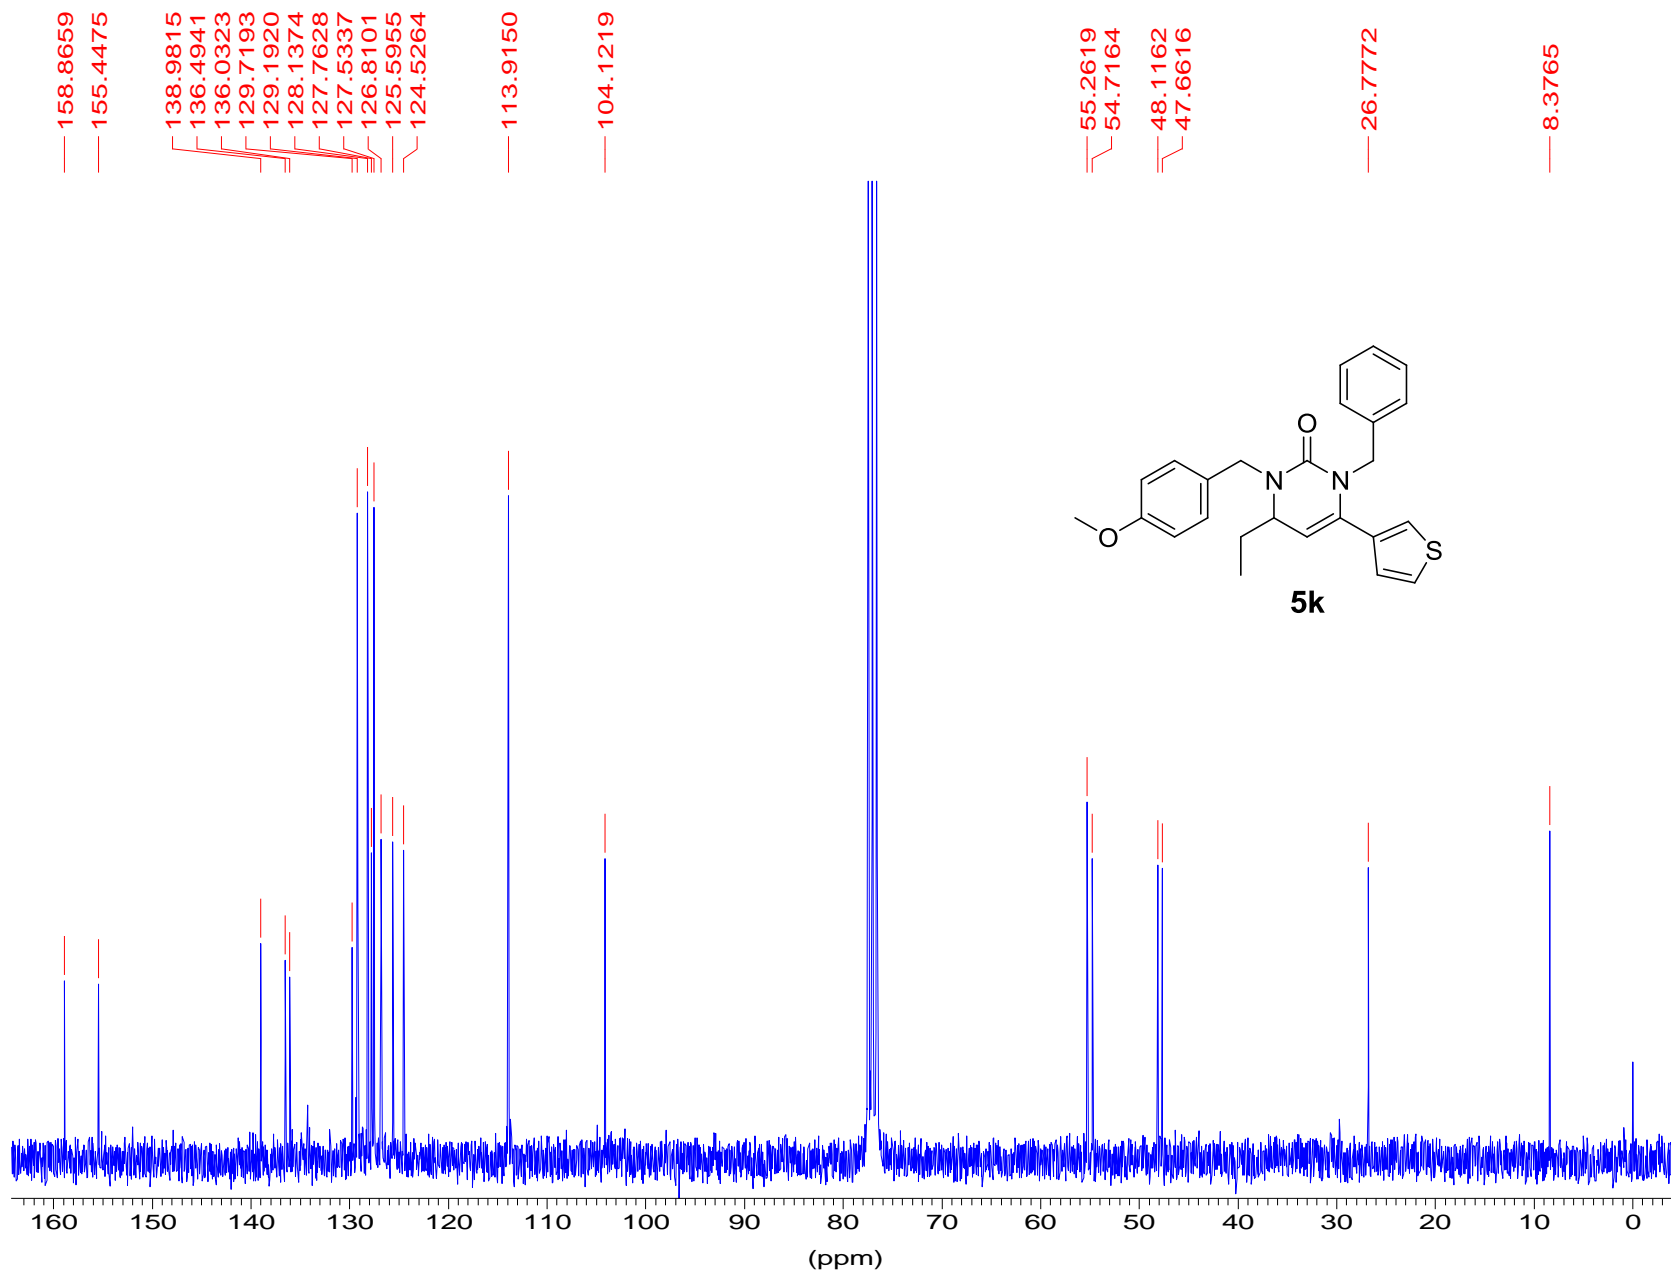

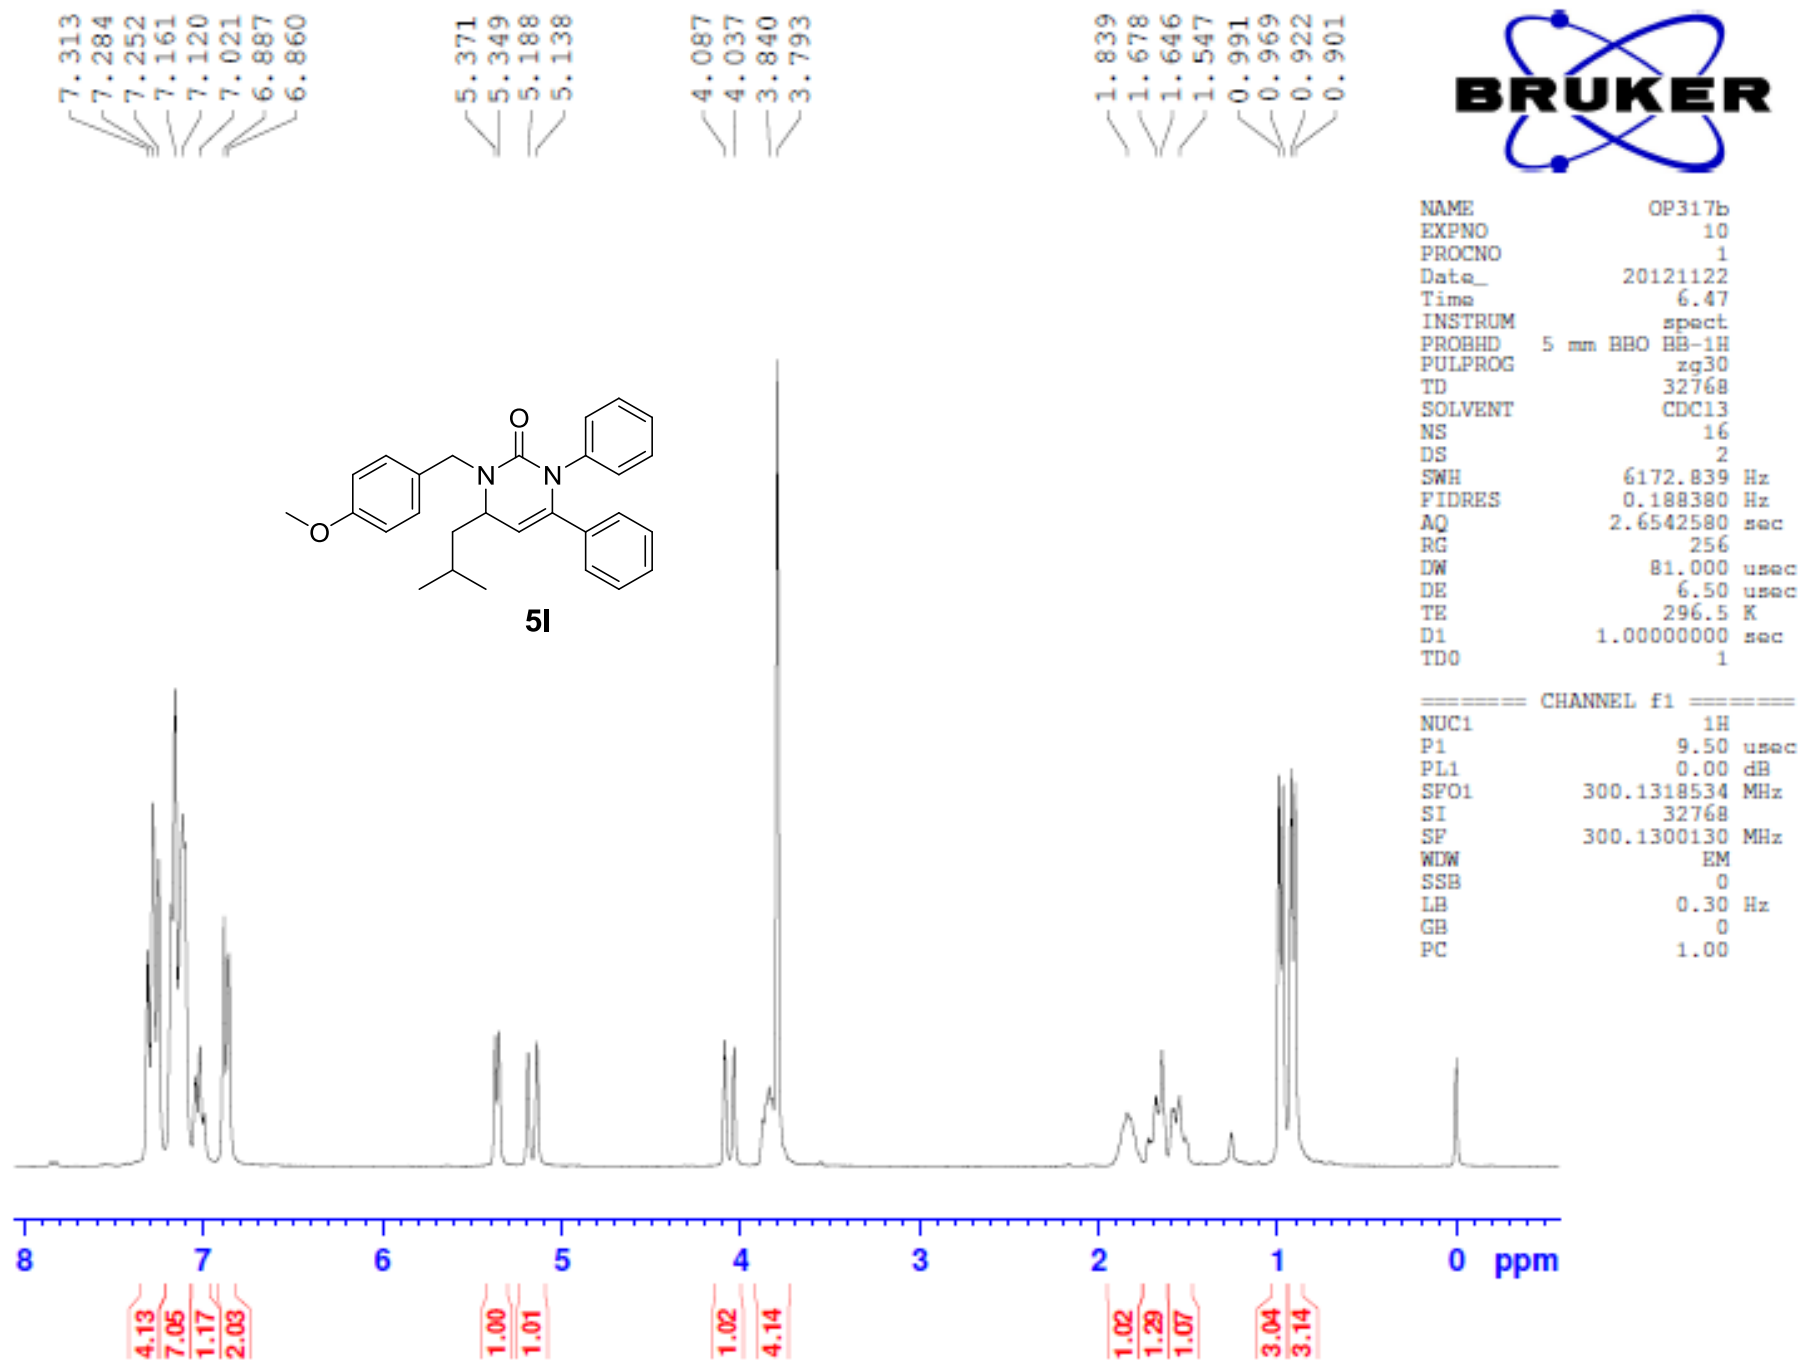



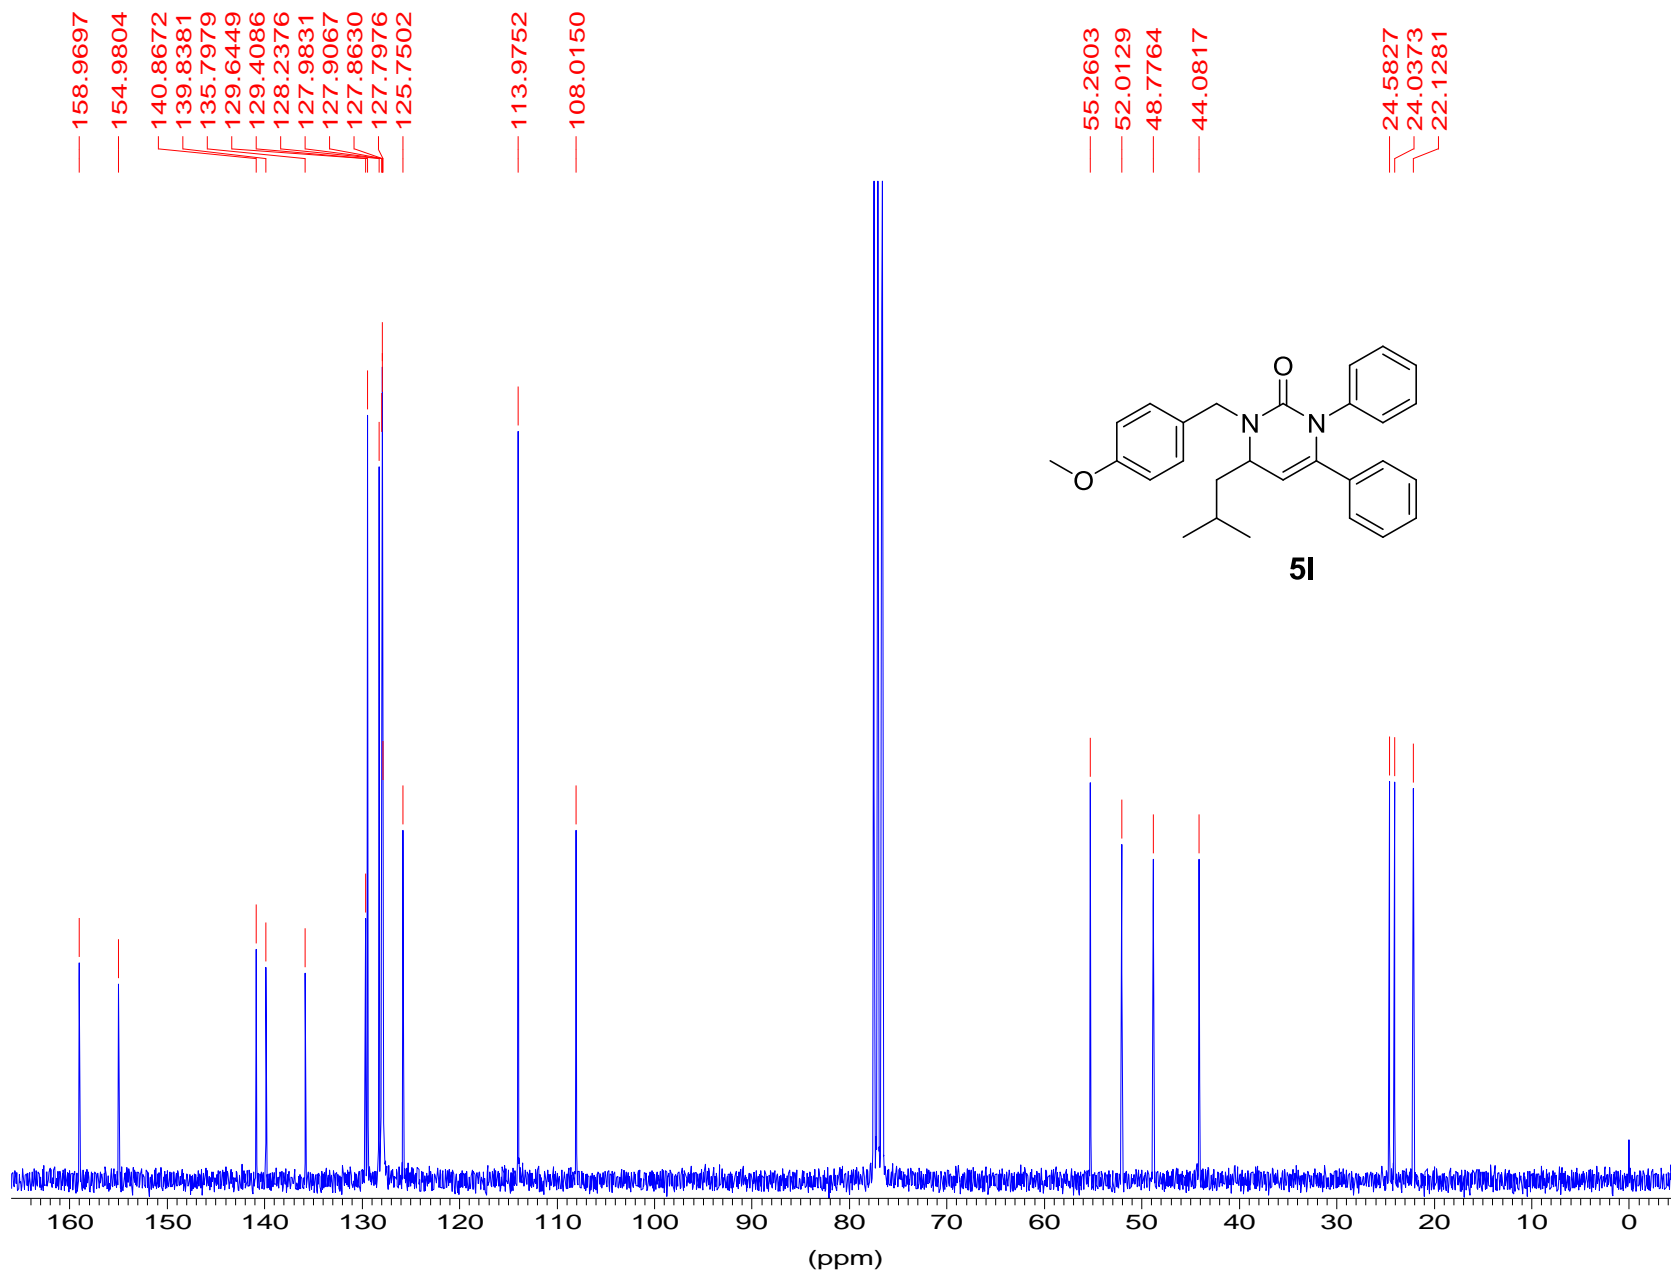

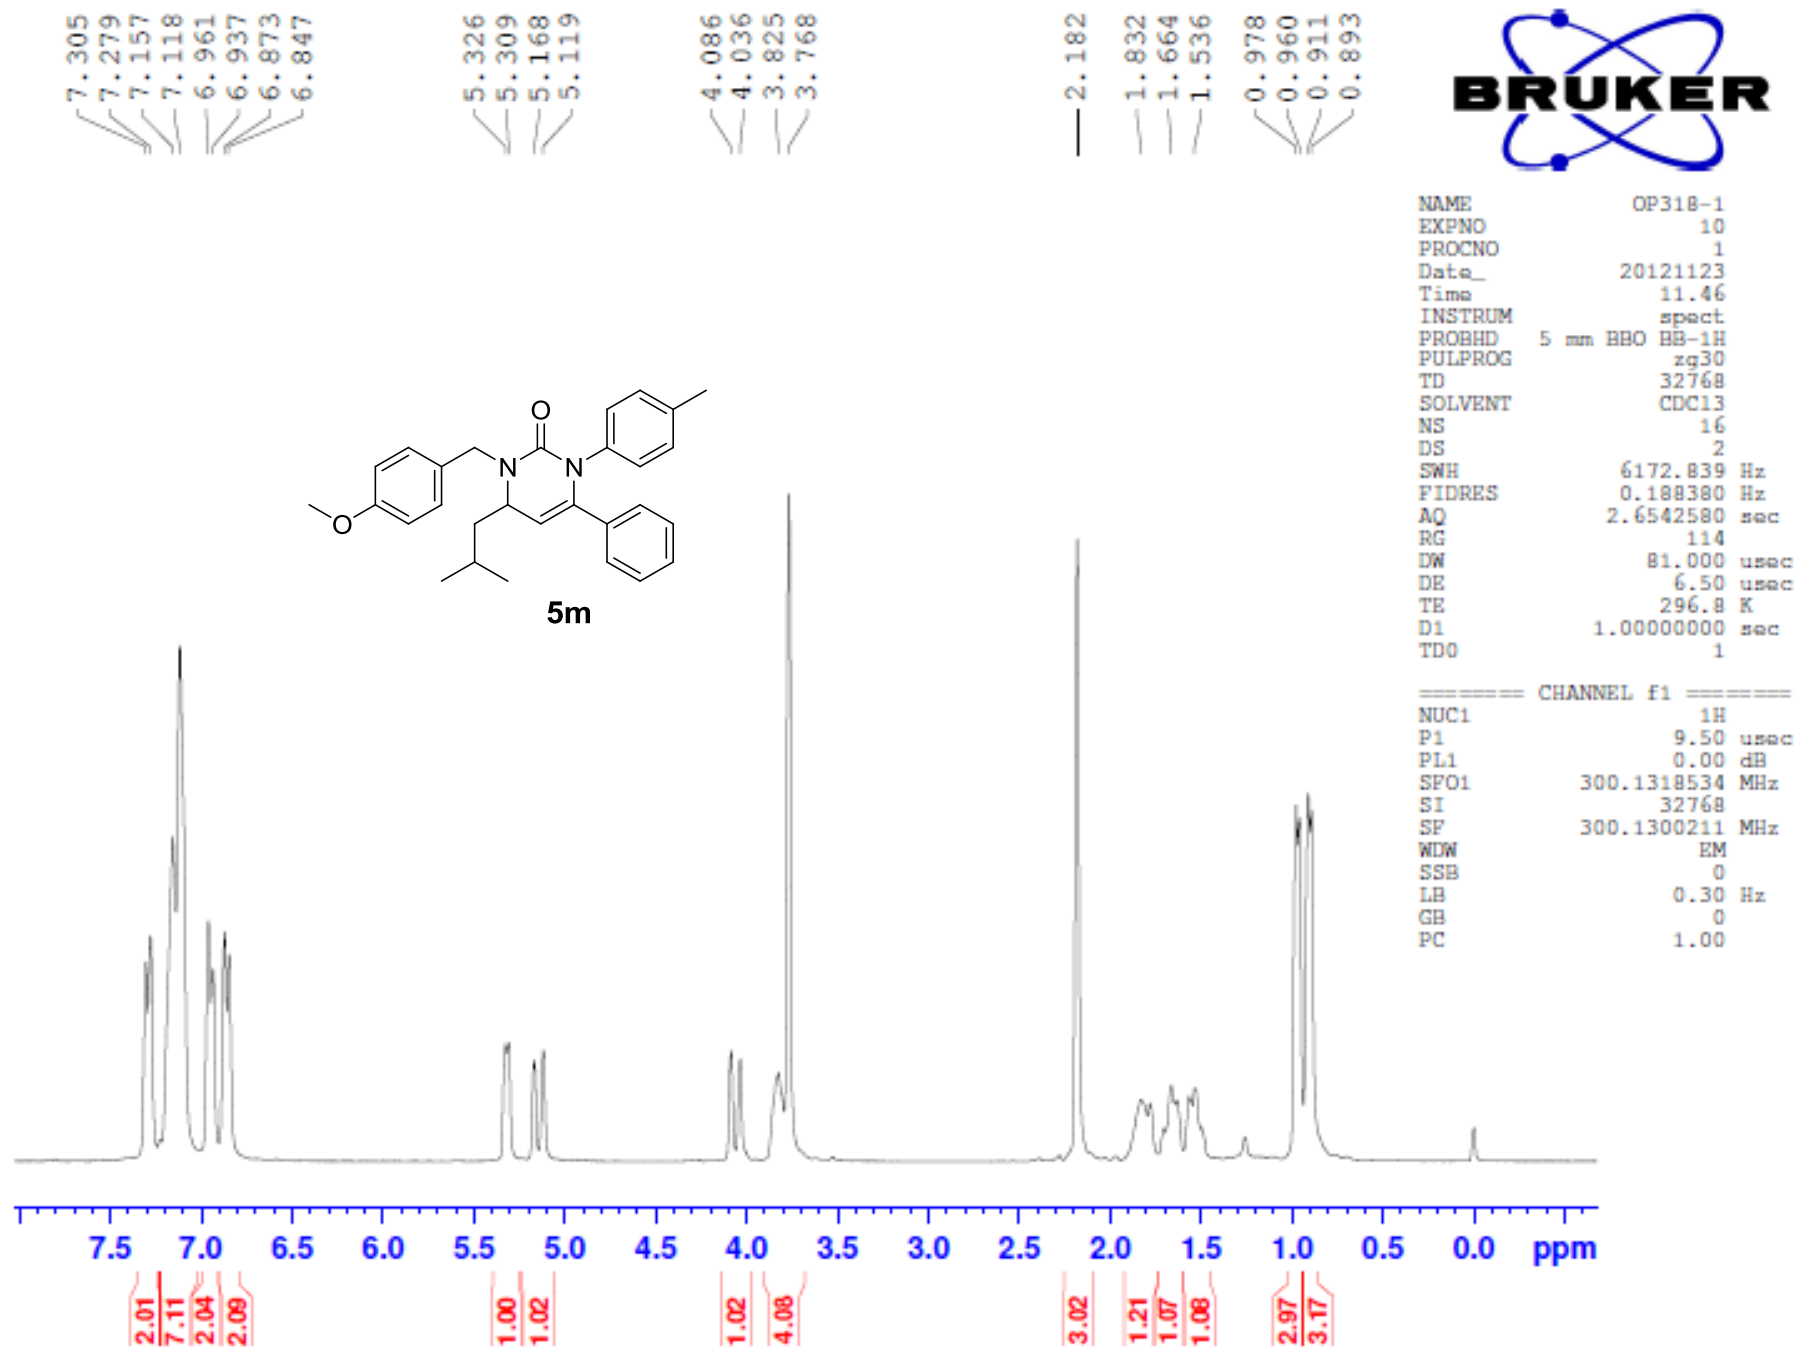

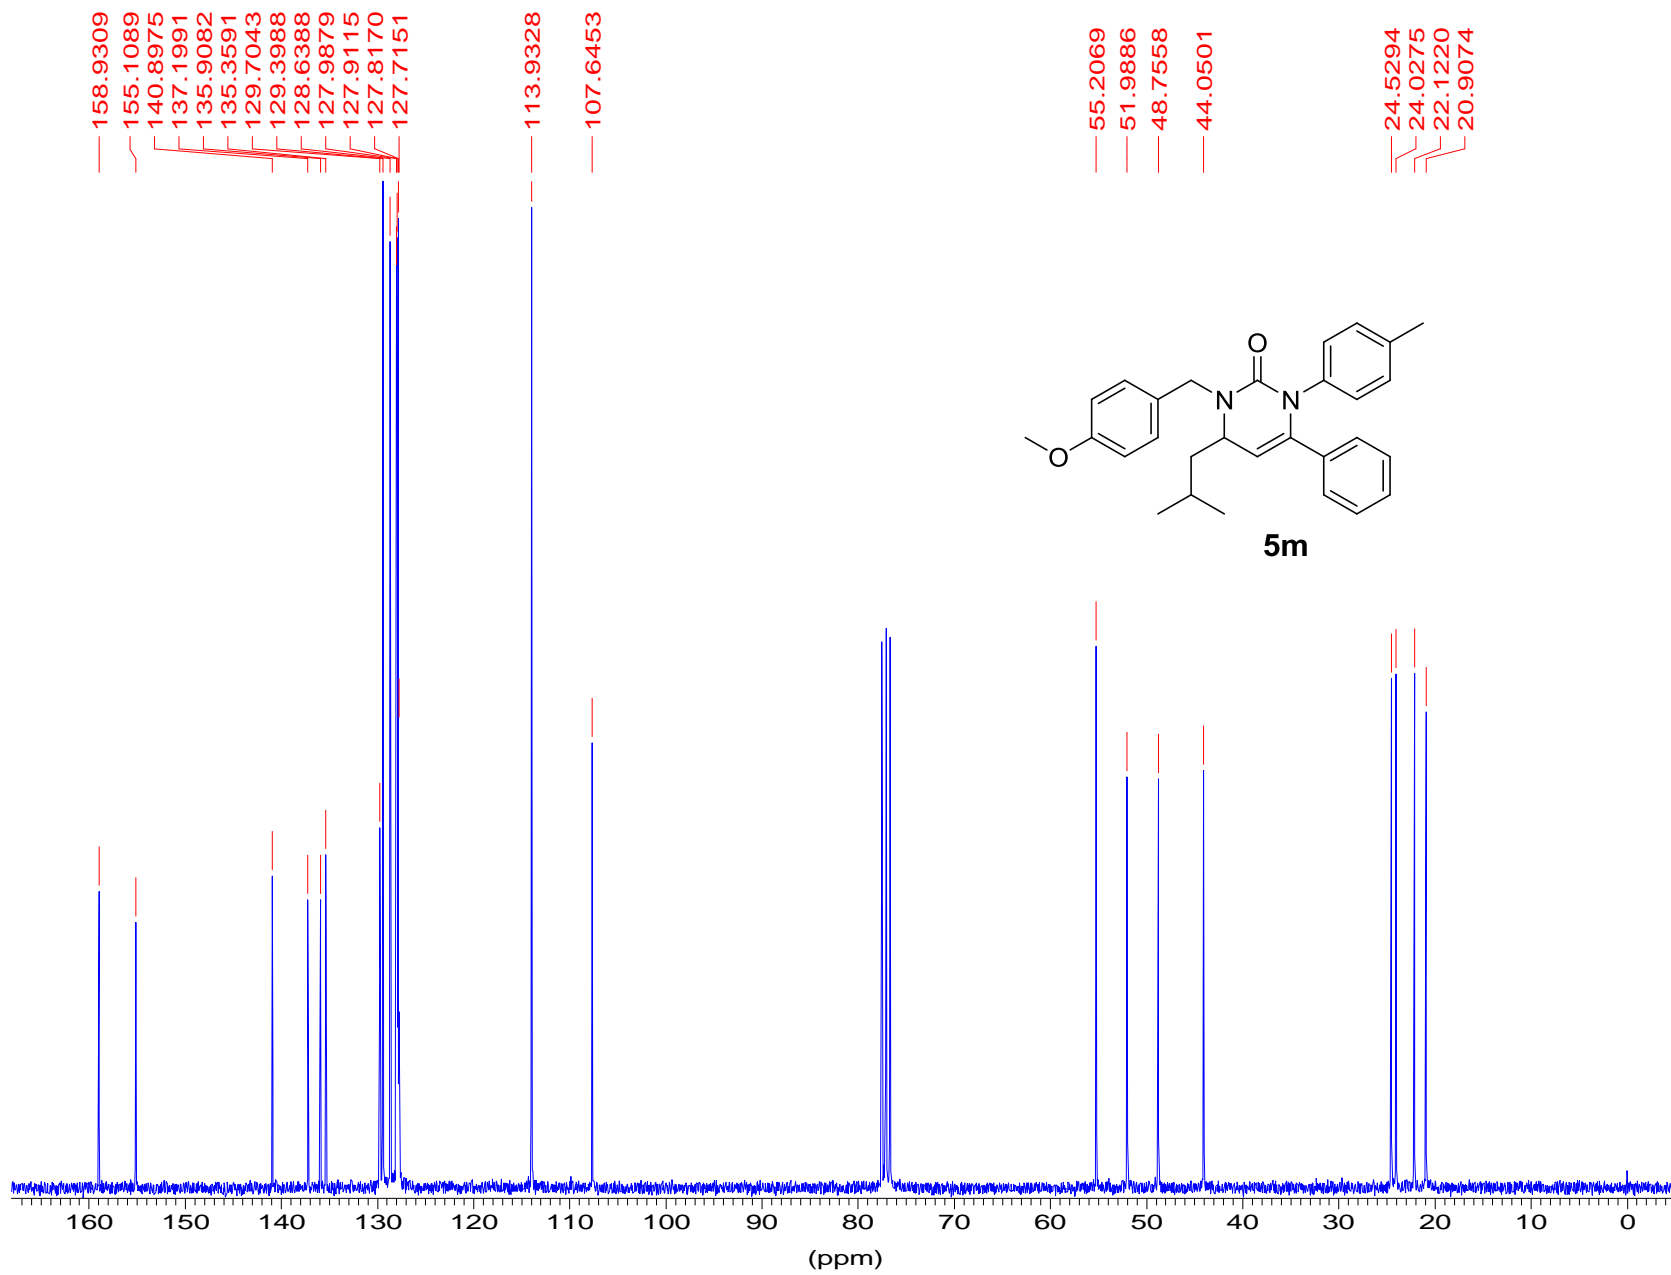

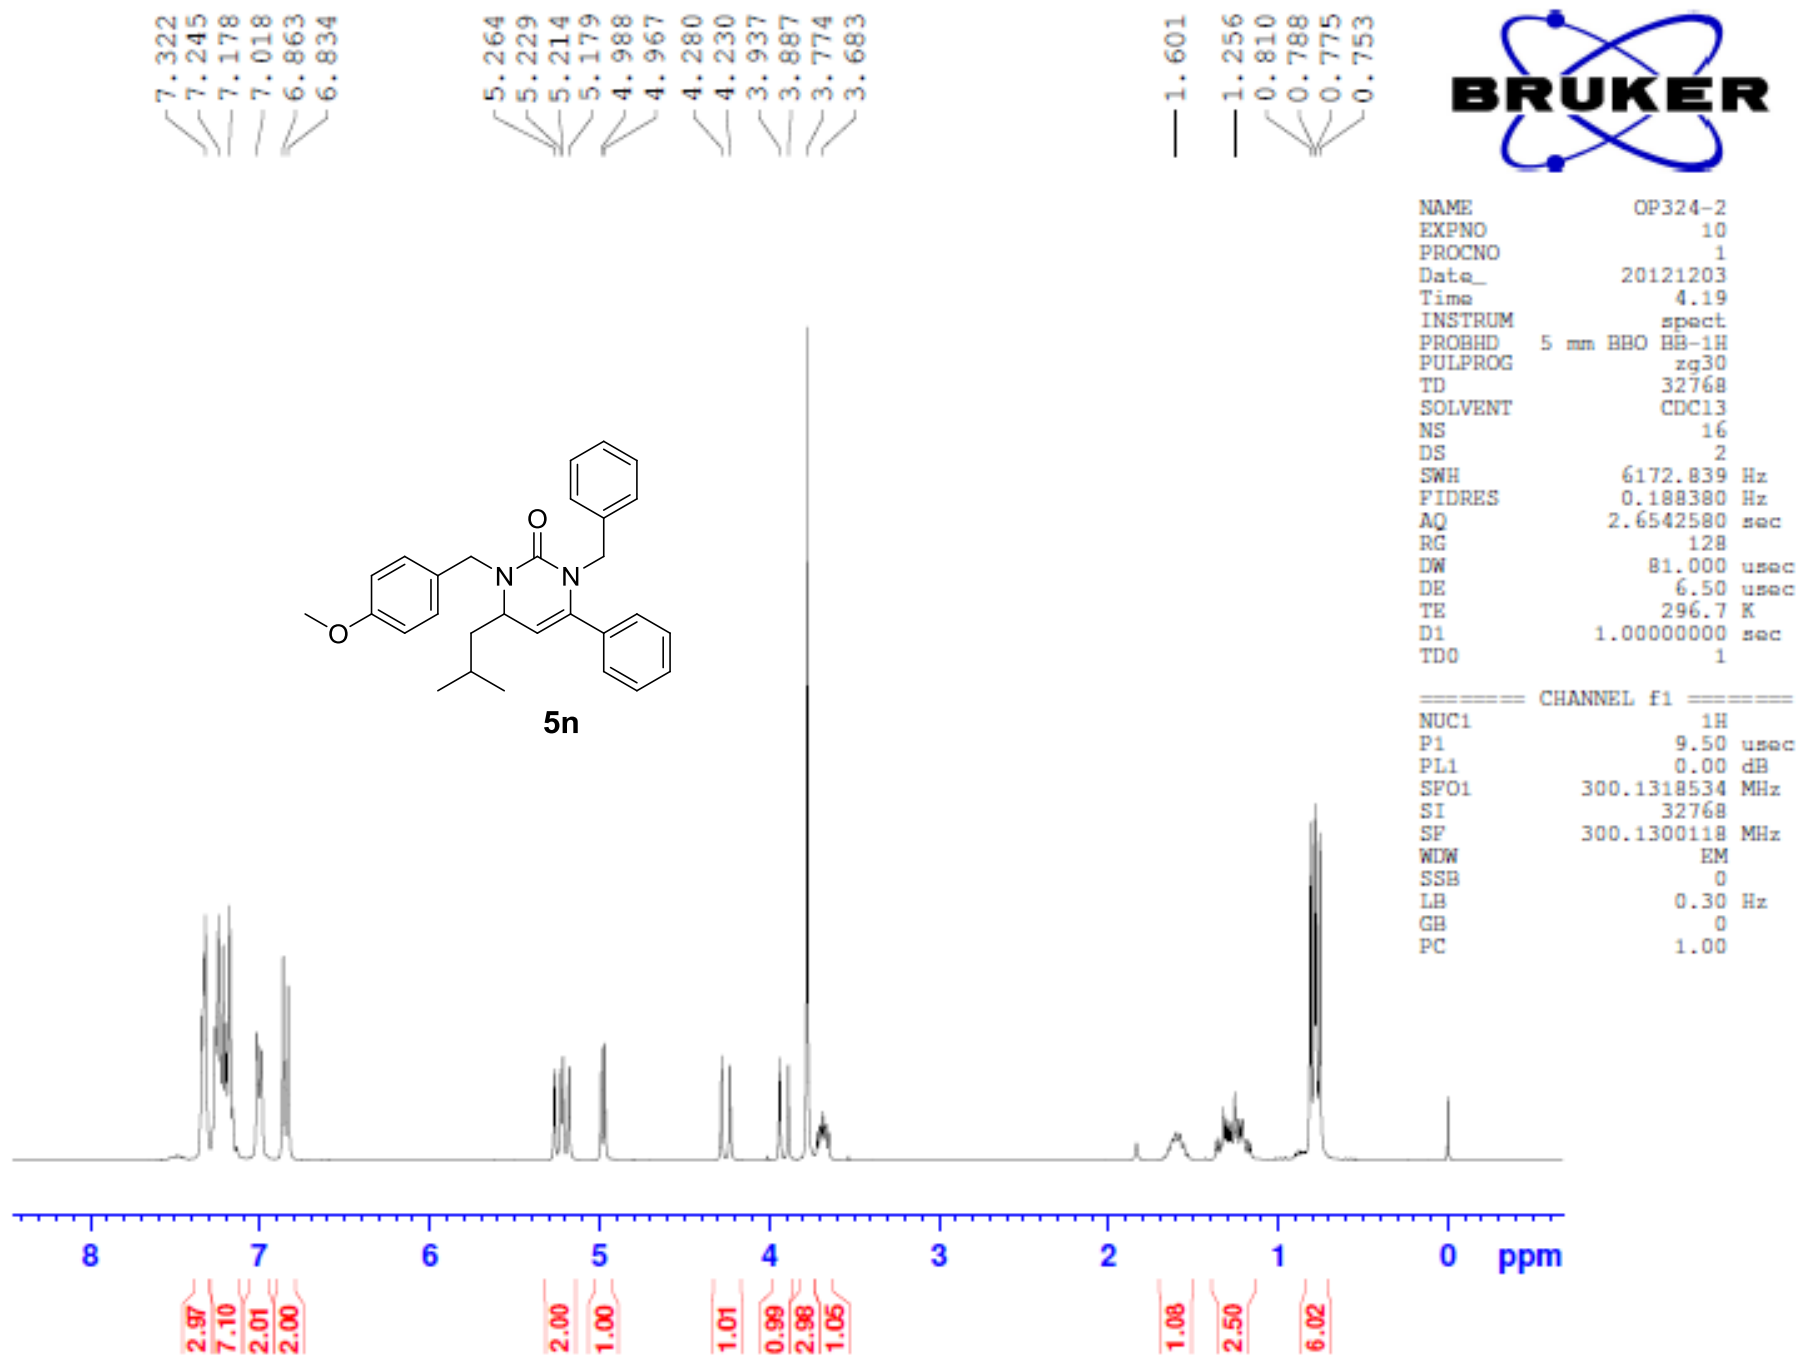

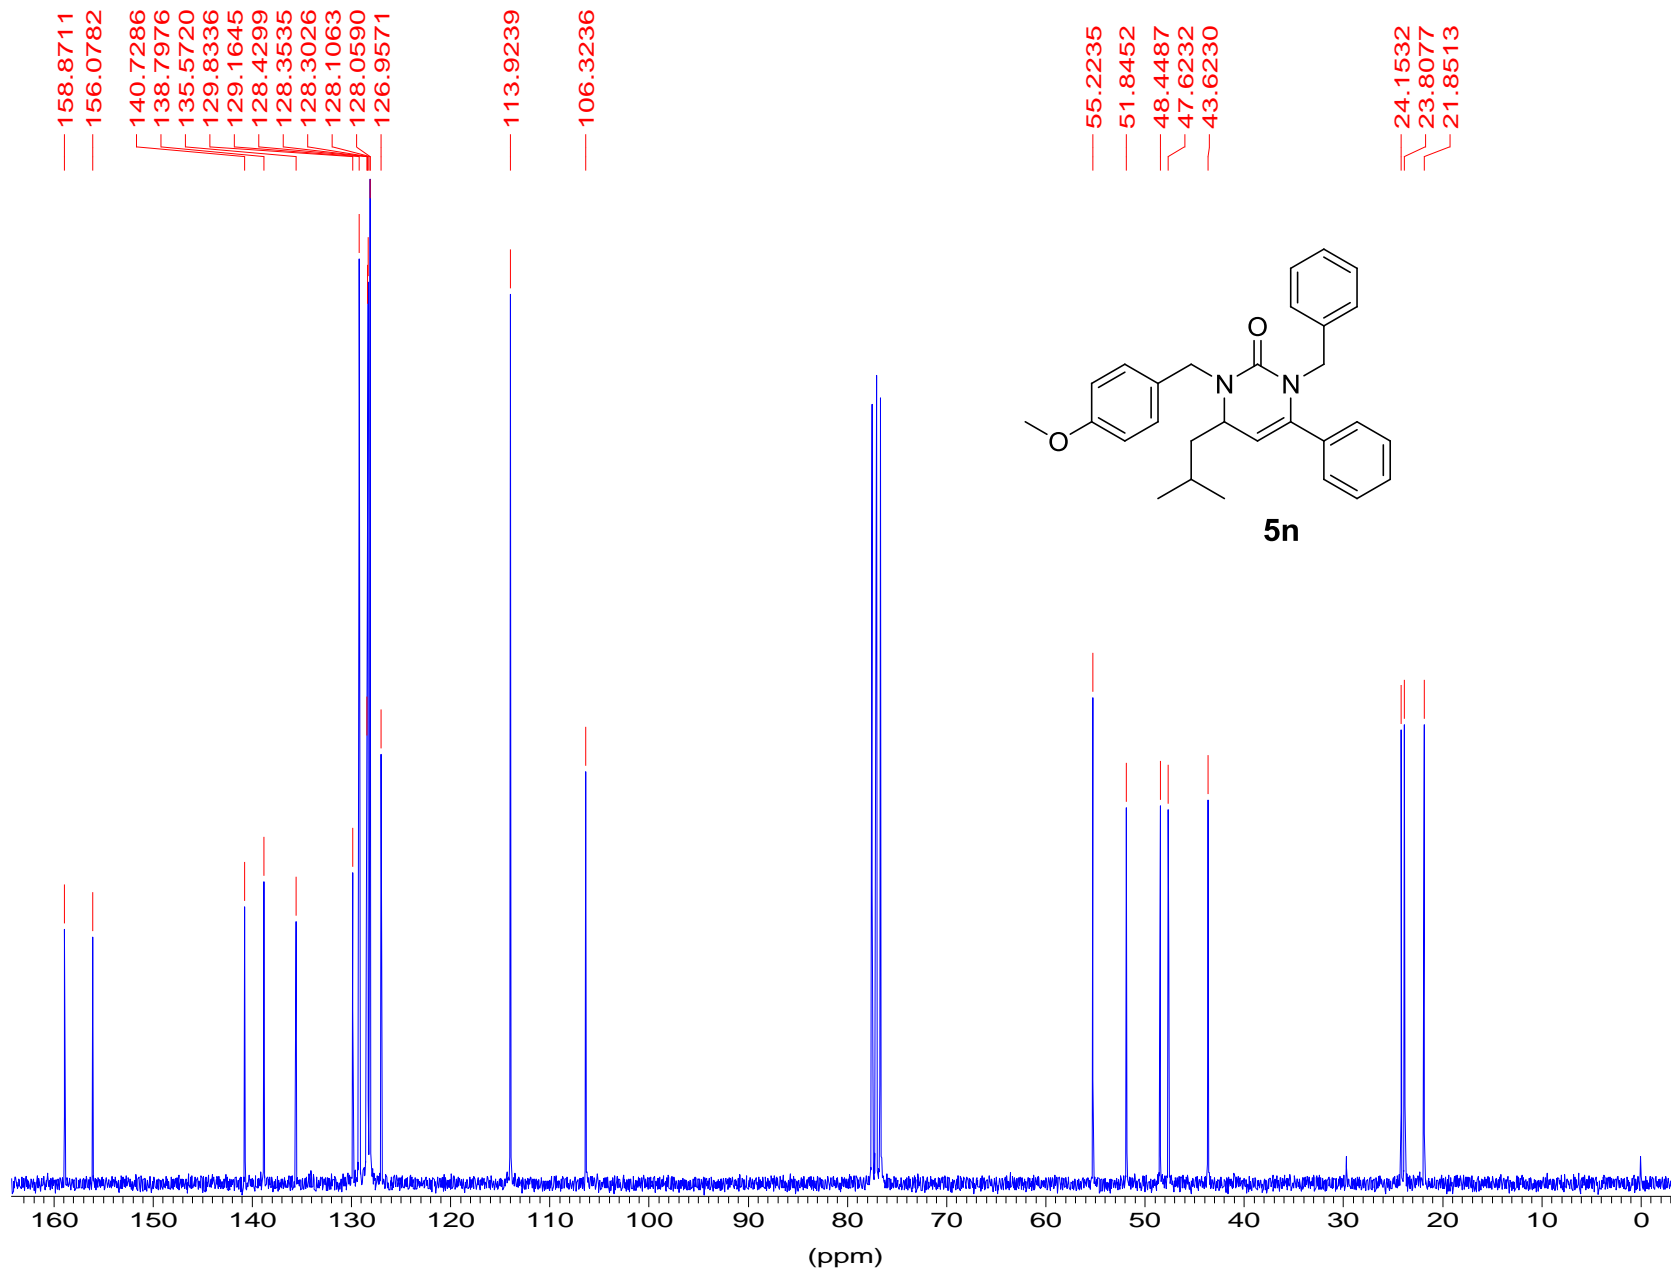

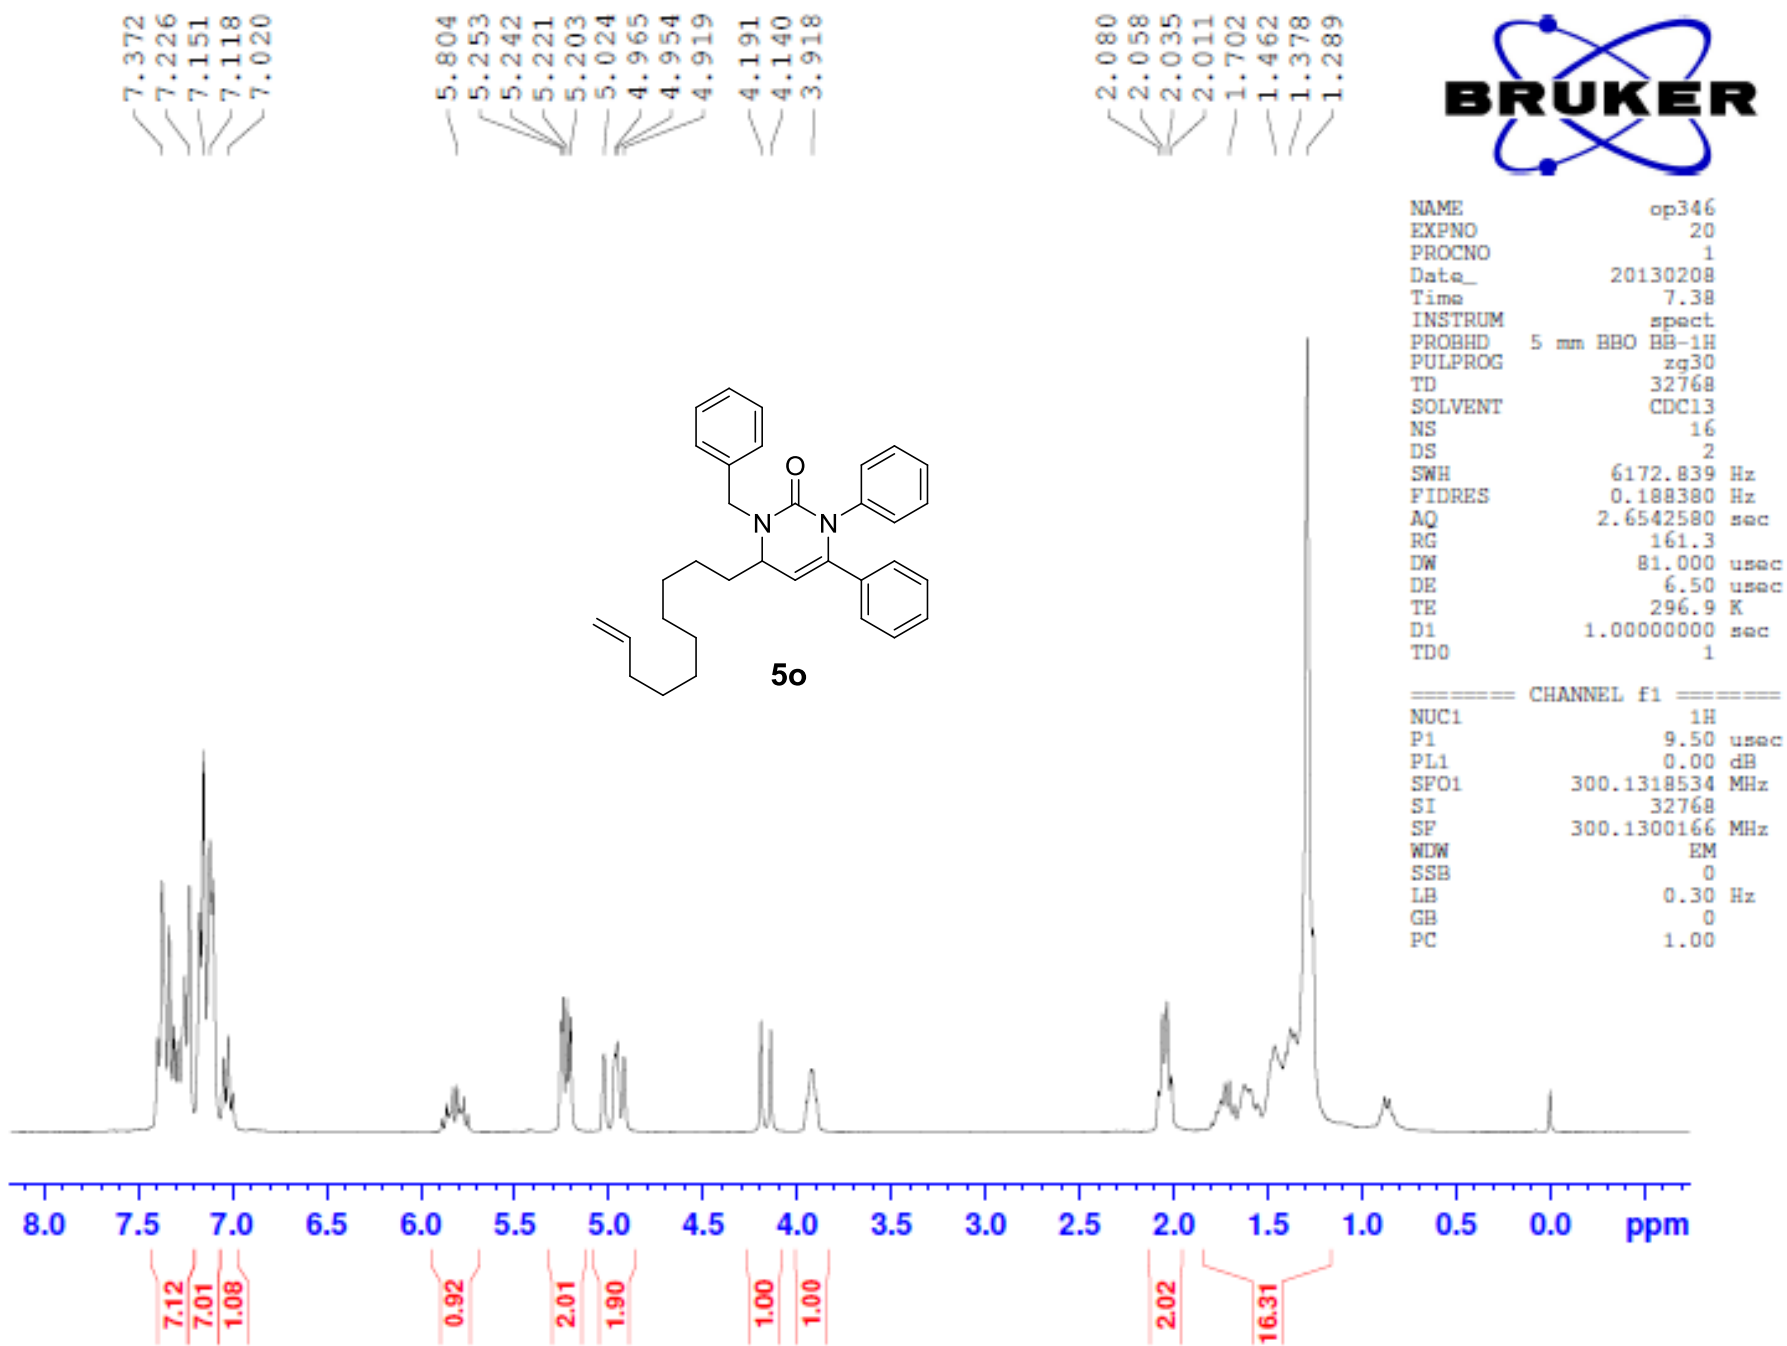

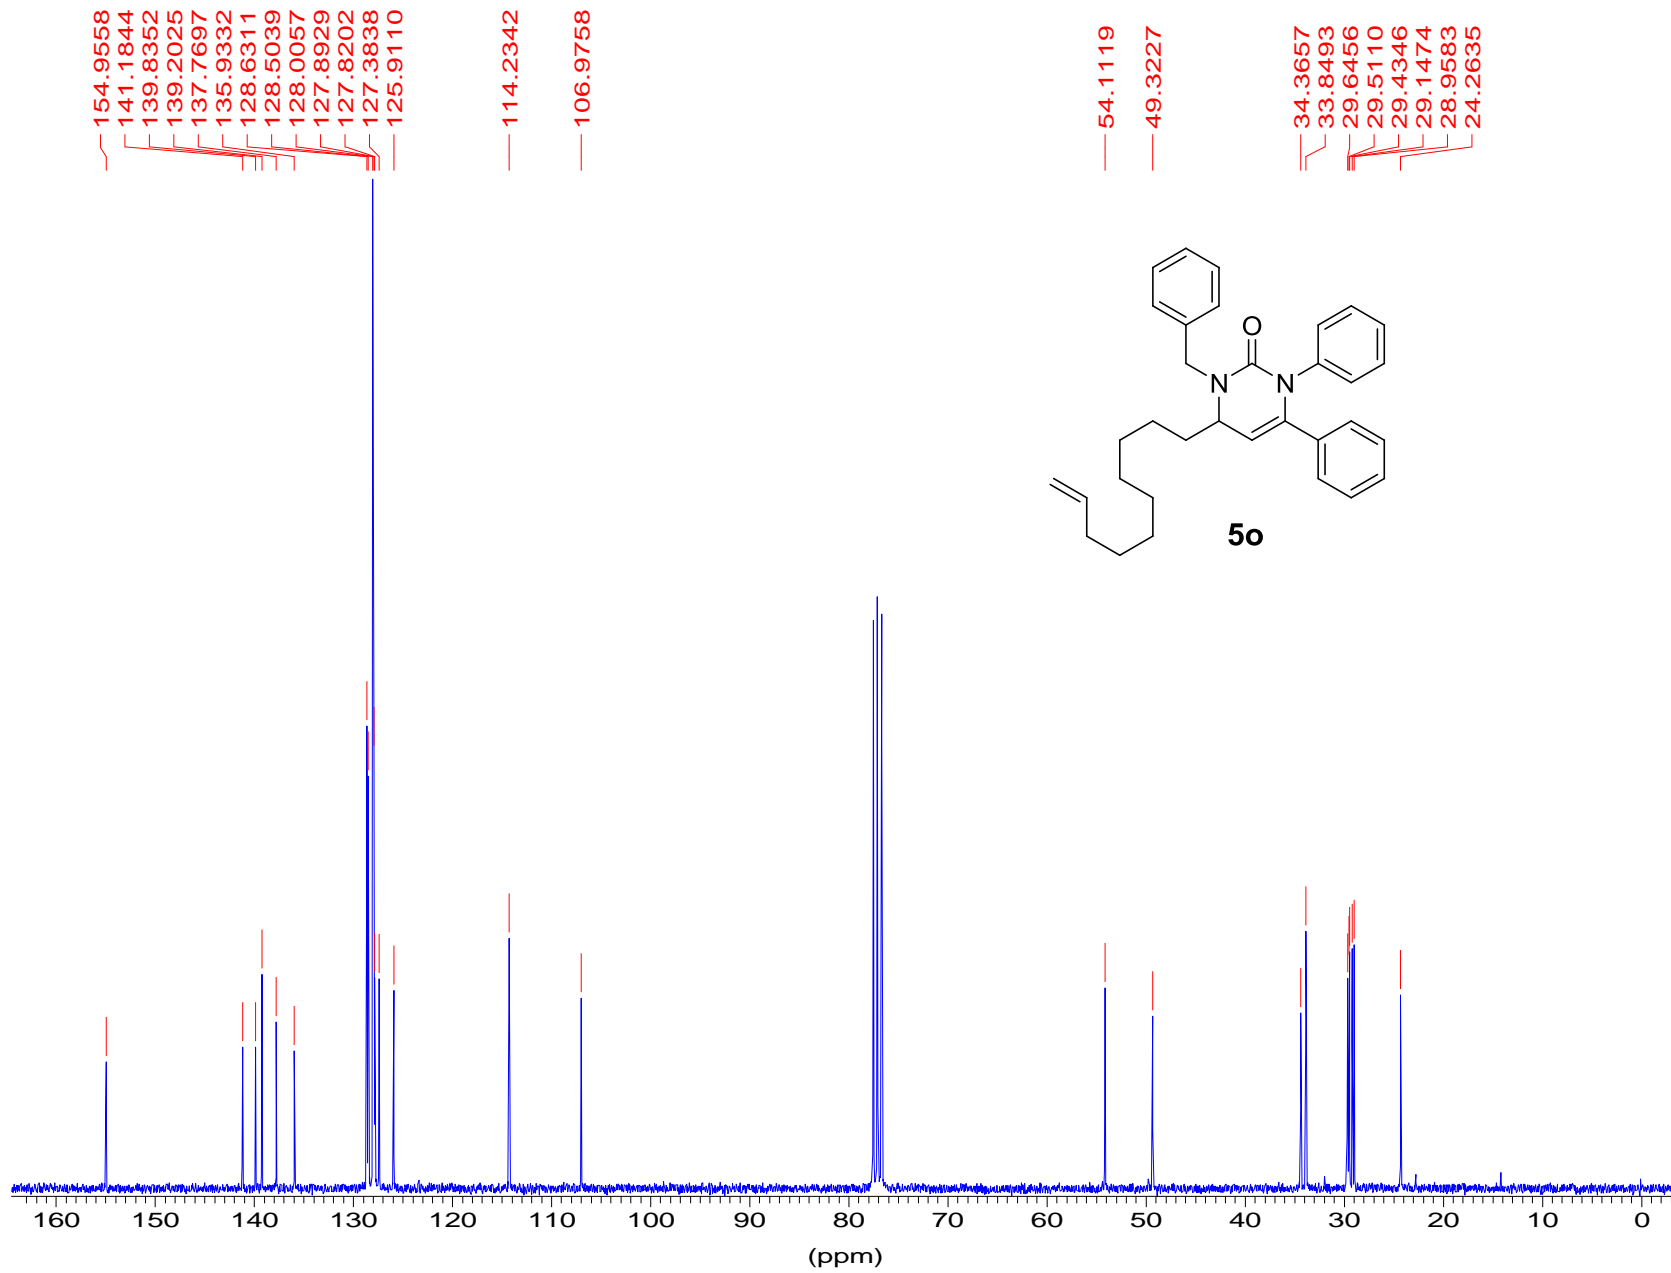

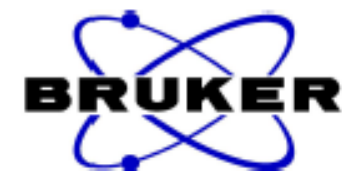

NAME op348  
EXPNO 30  
PROCNO 1  
Date\_ 20130215  
Time 7.46  
INSTRUM spect  
PROBHD 5 mm BBO BB-1H  
PULPROG zg30  
TD 32768  
SOLVENT CDCl3  
NS 16  
DS 2  
SWH 6172.839 Hz  
FIDRES 0.188380 Hz  
AQ 2.6542580 sec  
RG 228.1  
DW 81.000 usec  
DE 6.50 usec  
TE 296.6 K  
D1 1.00000000 sec  
TD0 1

==== CHANNEL f1 =====  
NUC1 1H  
P1 9.50 usec  
PL1 0.00 dB  
SFO1 300.1318534 MHz  
SI 32768  
SF 300.1300080 MHz  
WDW EM  
SSB 0  
LB 0.30 Hz  
GB 0  
PC 1.00

7.254  
7.216  
7.098  
7.069  
7.025  
7.002  
6.981  
6.836  
6.808

5.116  
5.066  
4.739  
4.718  
4.258  
4.208  
3.958

2.723  
2.494  
2.465  
2.451  
2.423  
1.771  
1.587  
1.505  
1.288  
1.002  
0.978  
0.954  
0.873

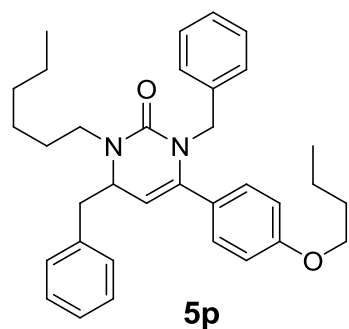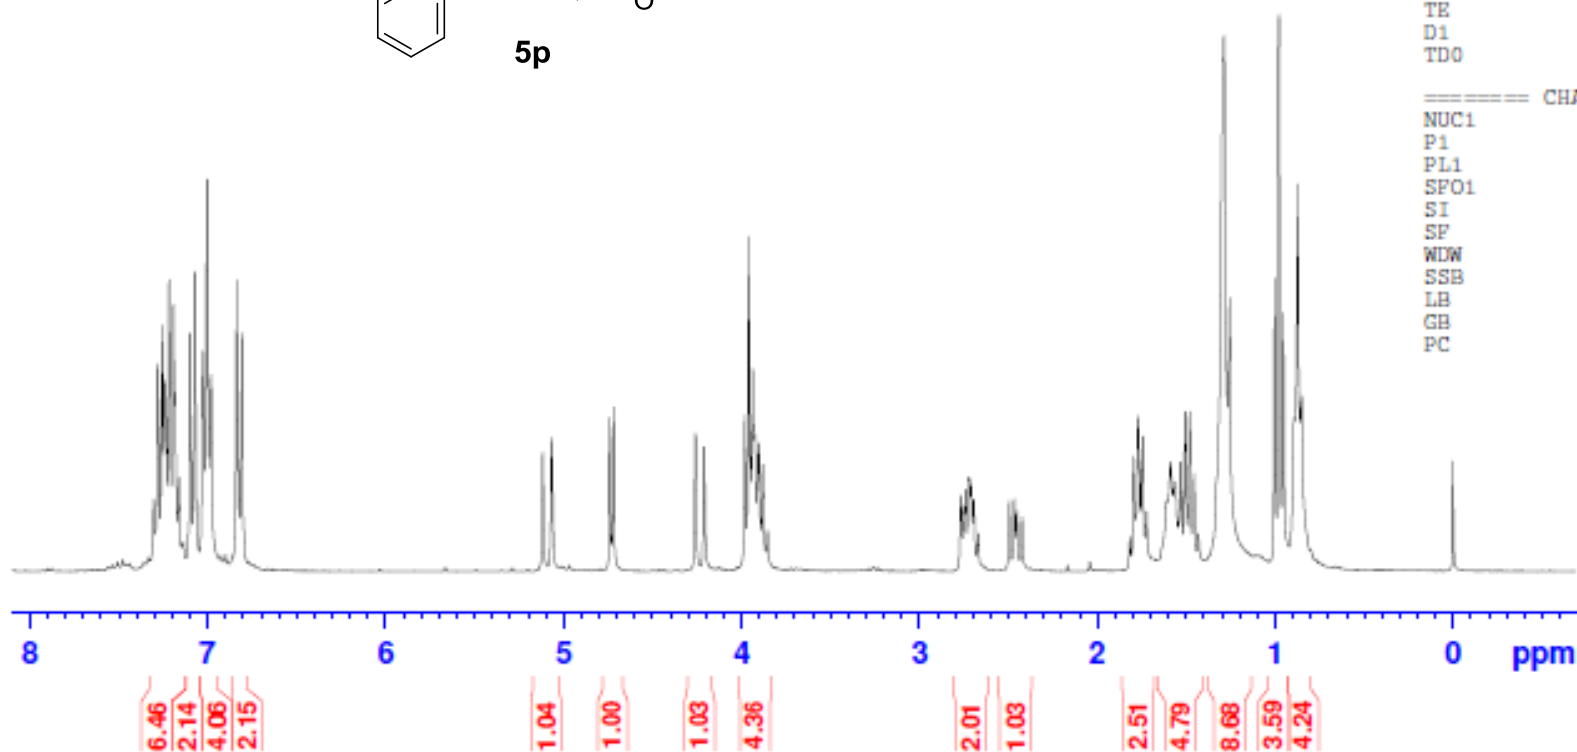



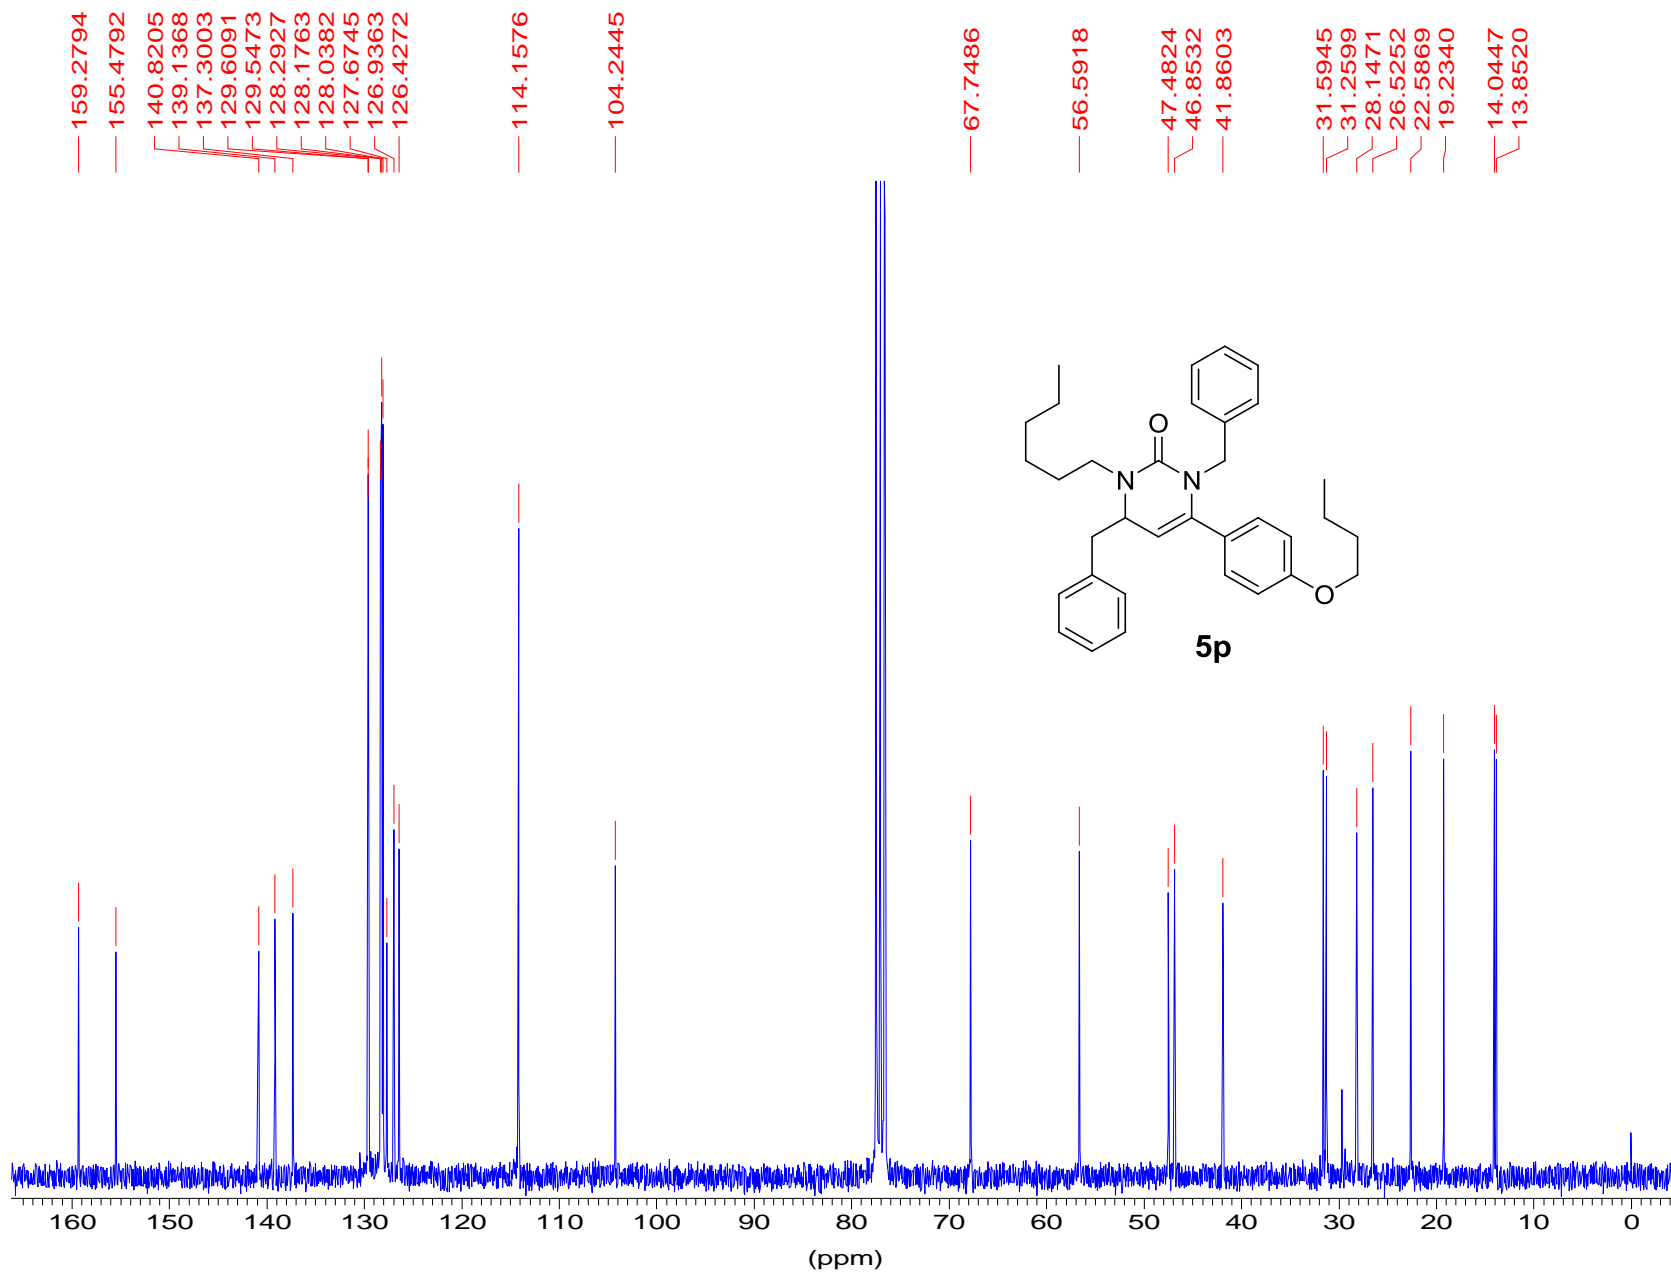

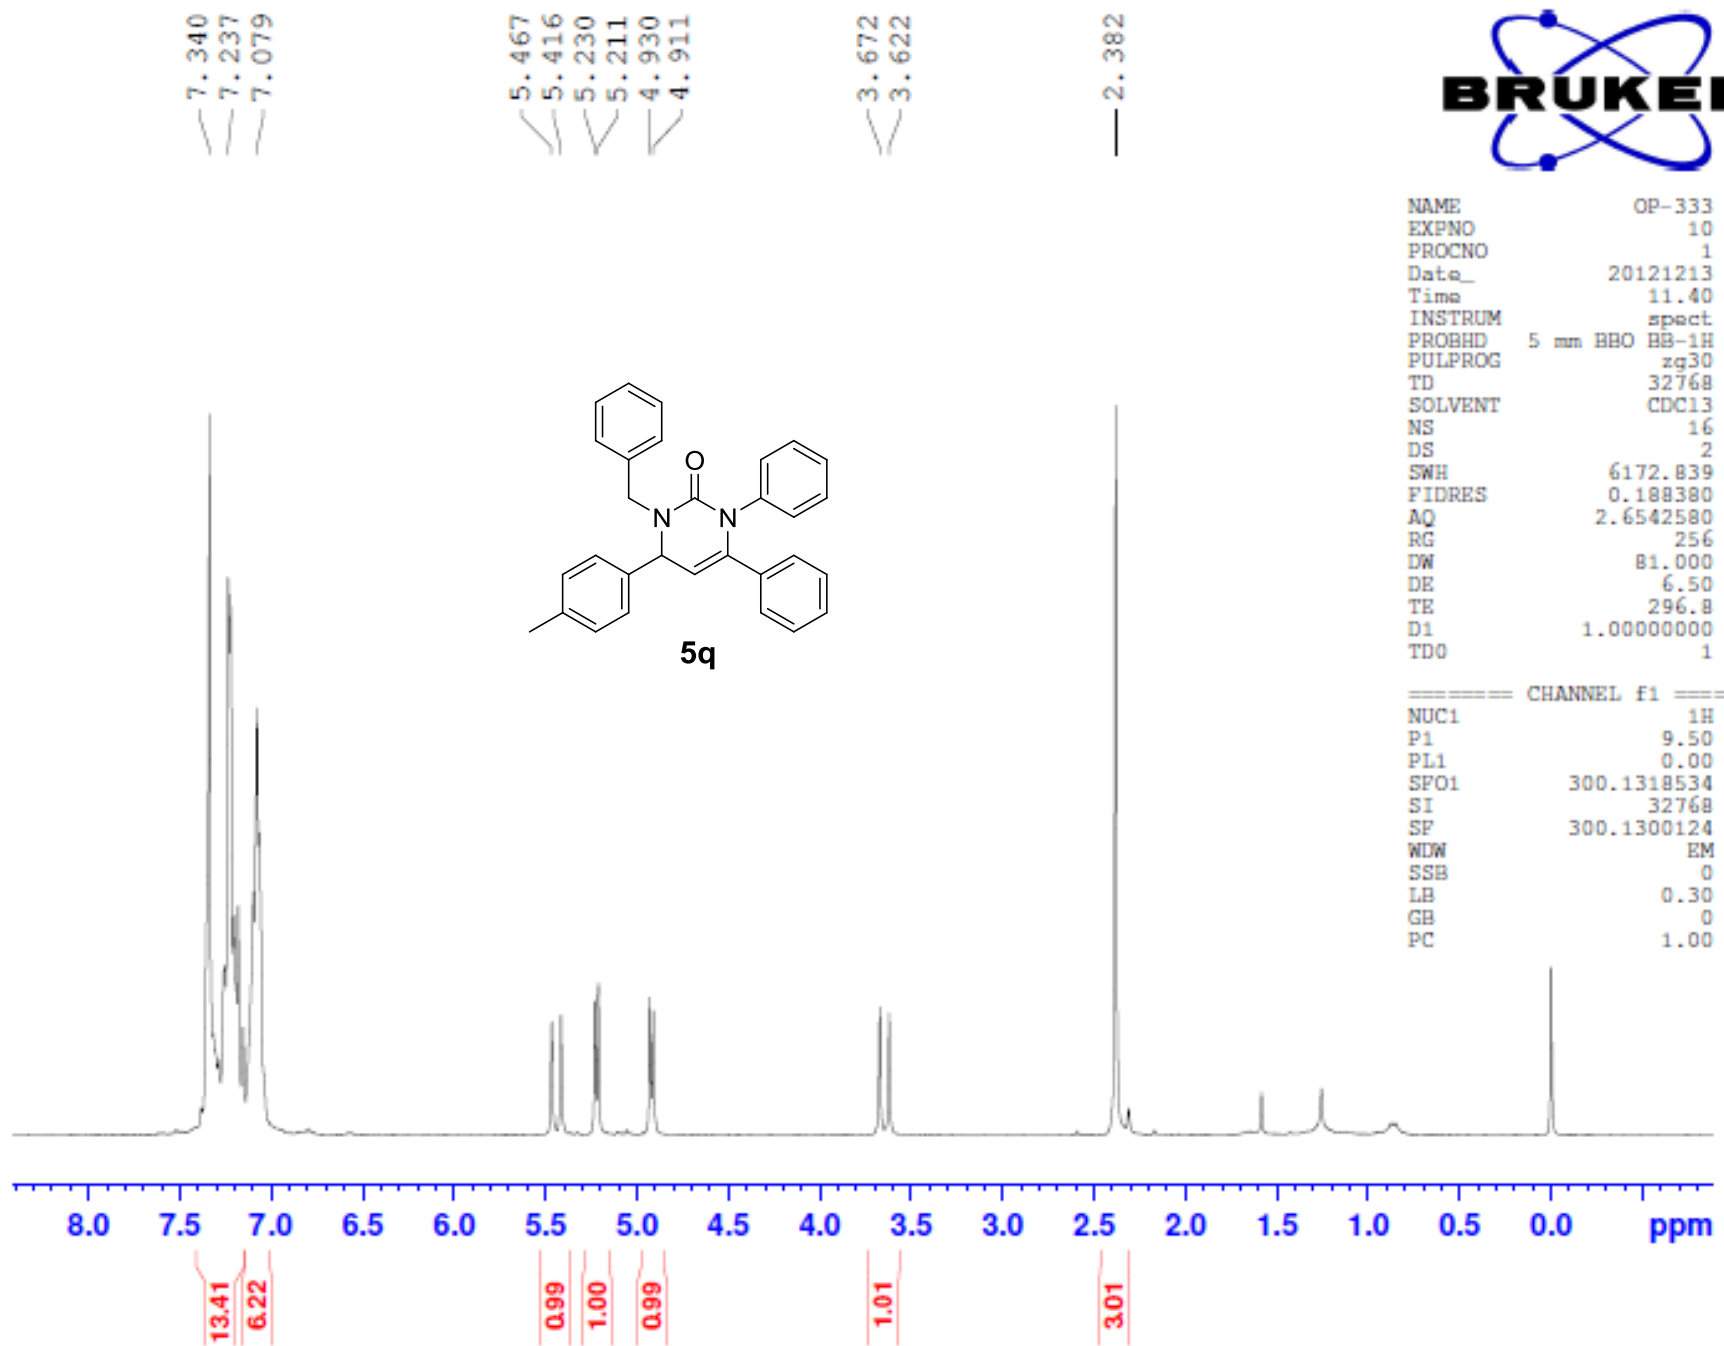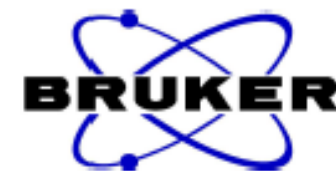

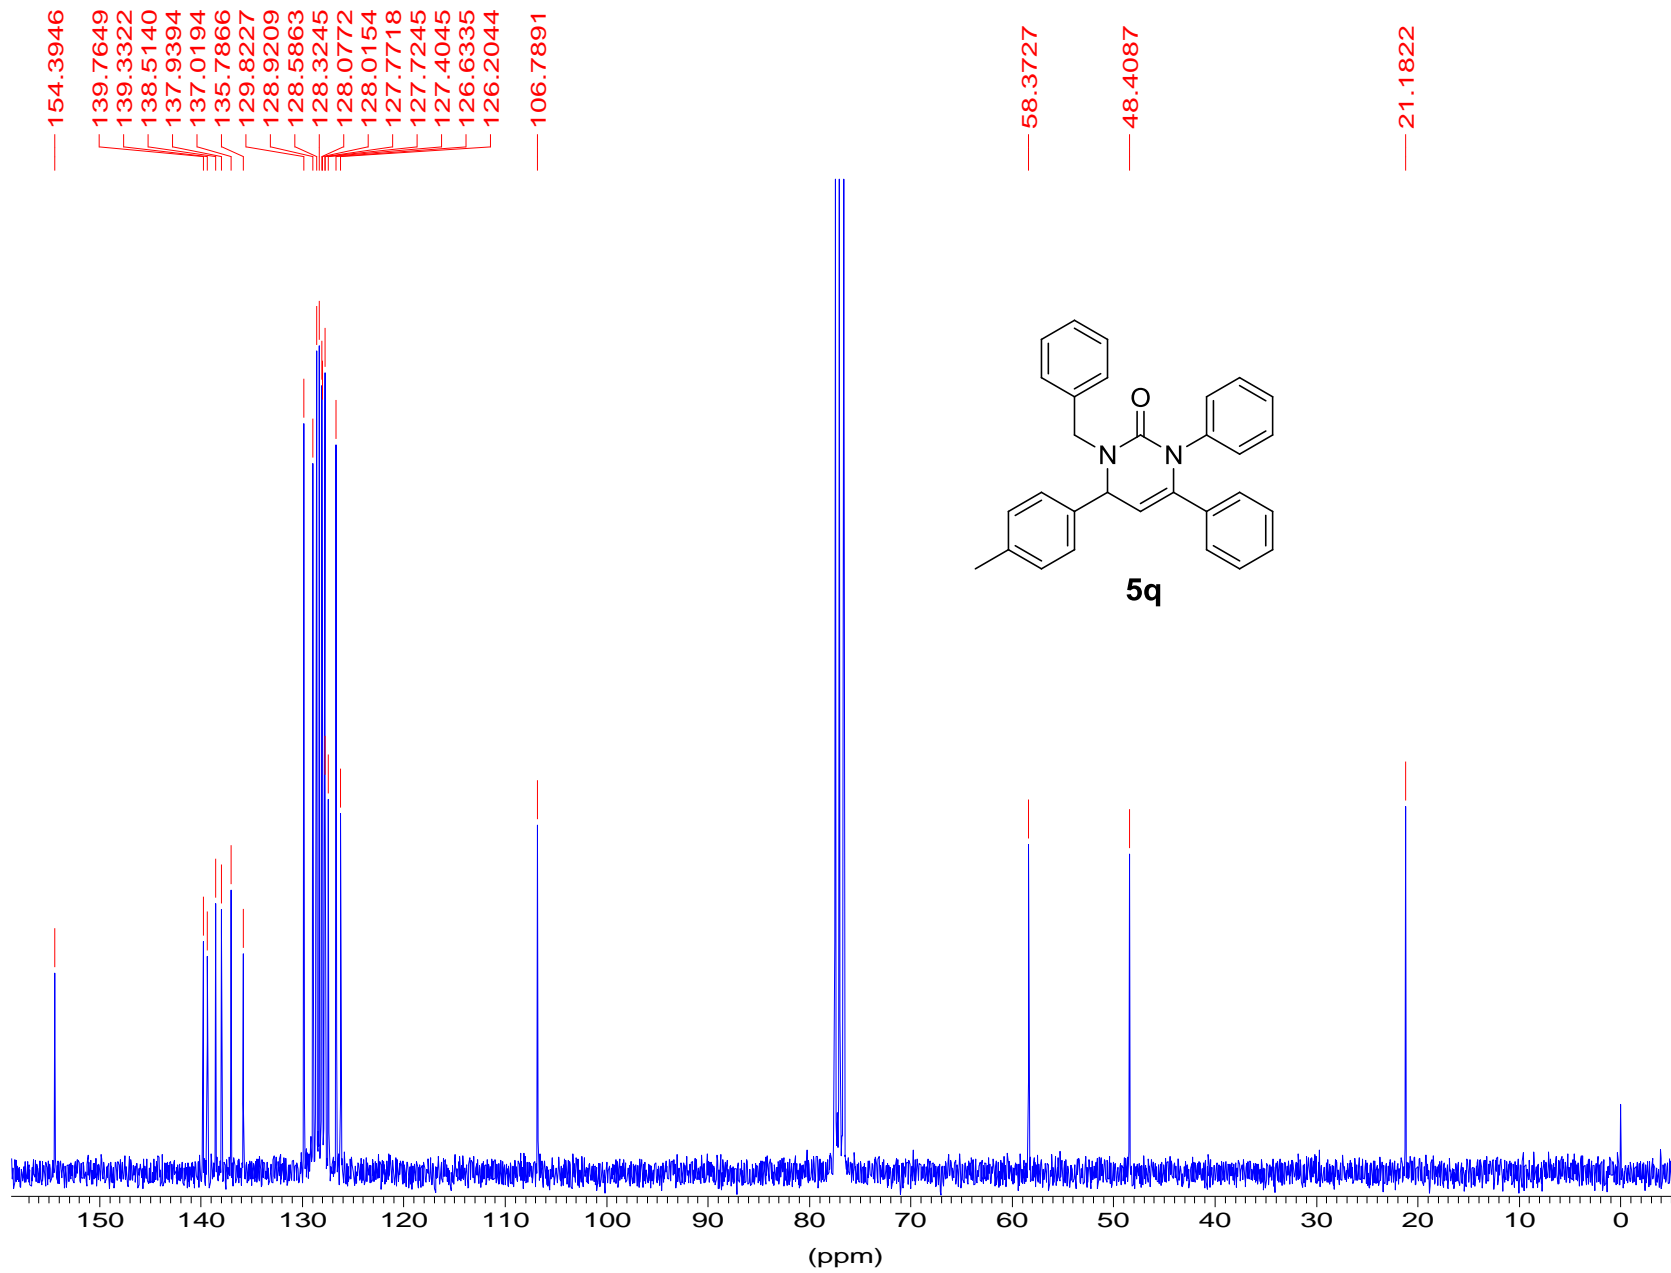

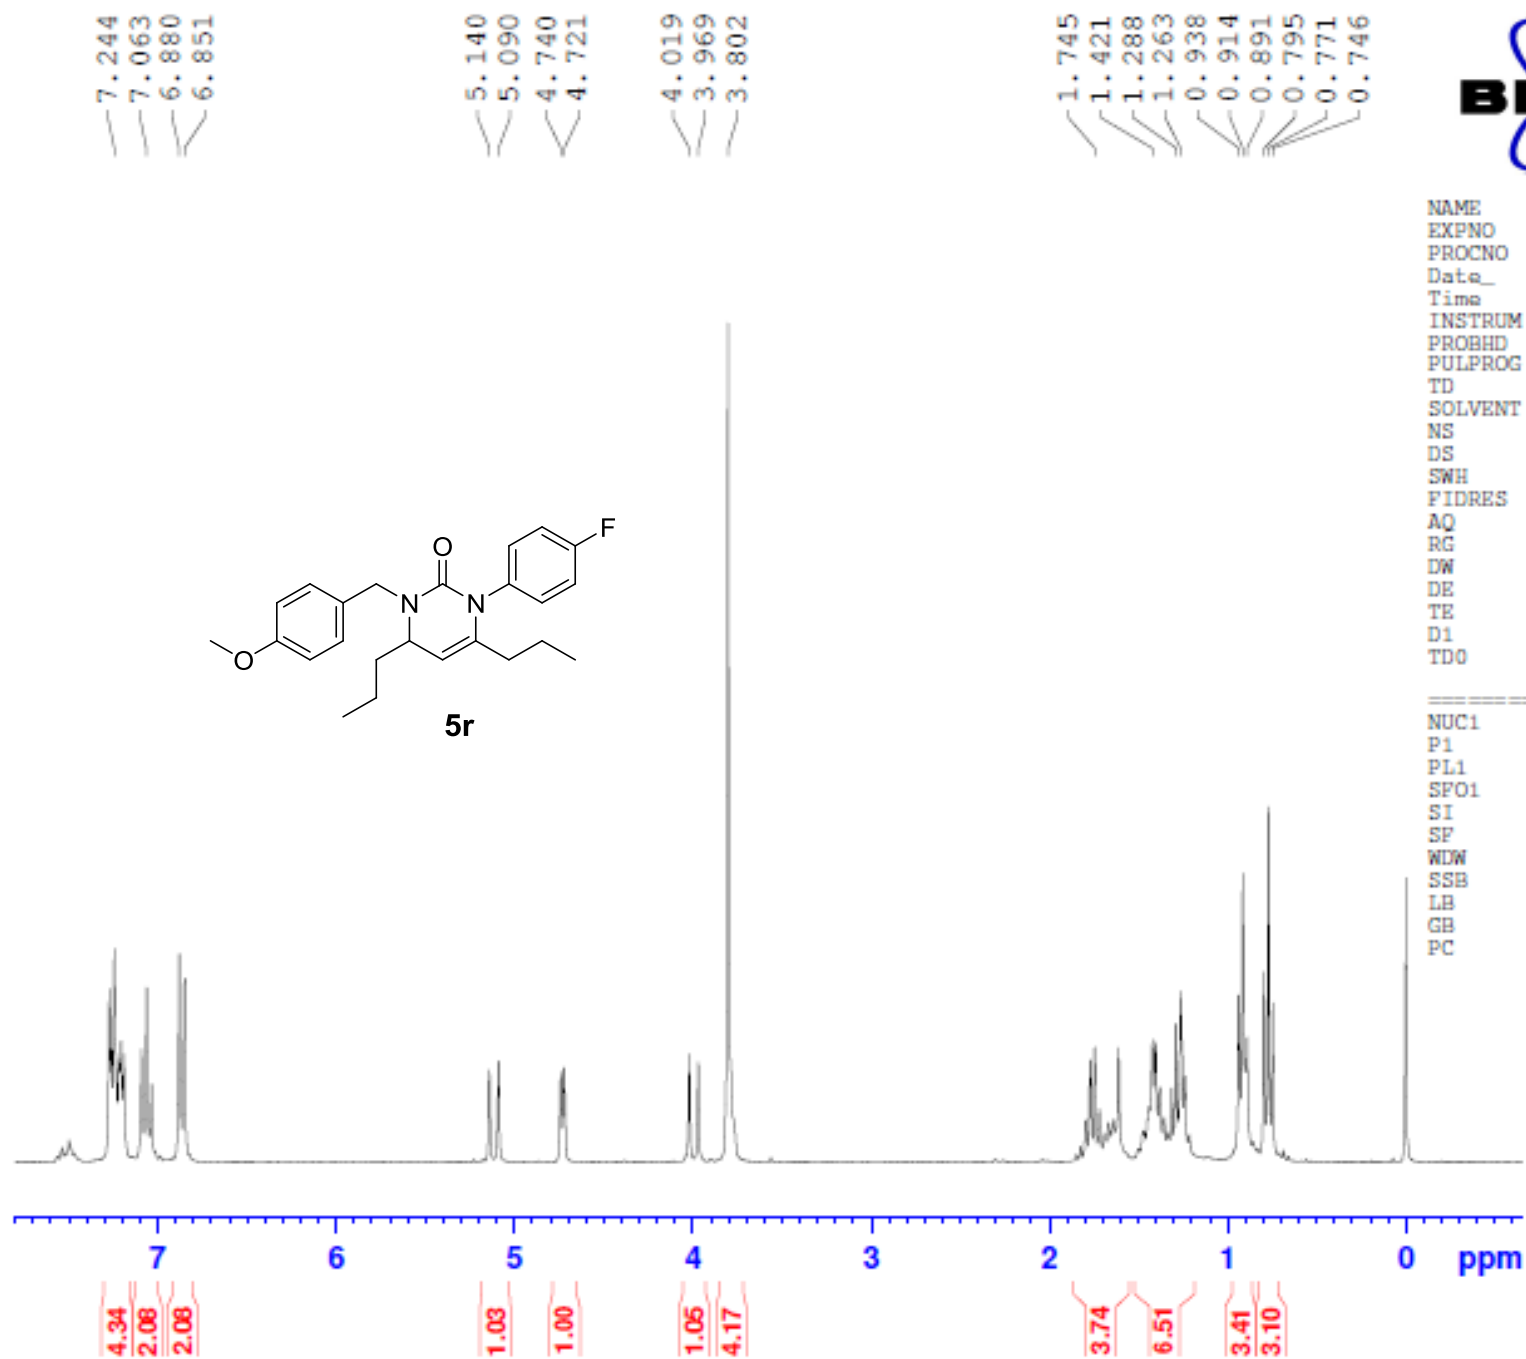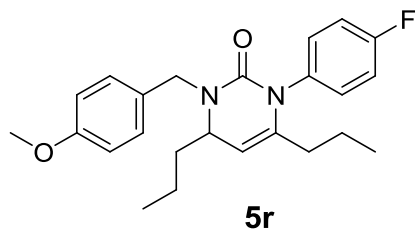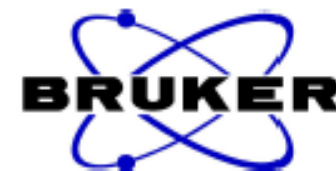

NAME op336-1  
EXPNO 20  
PROCNO 1  
Date\_ 20121214  
Time 10.37  
INSTRUM spect  
PROBHD 5 mm BBO BB-1H  
PULPROG zg30  
TD 32768  
SOLVENT CDCl3  
NS 16  
DS 2  
SWH 6172.839 Hz  
FIDRES 0.188380 Hz  
AQ 2.6542580 sec  
RG 362  
DW 81.000 usec  
DE 6.50 usec  
TE 296.9 K  
D1 1.00000000 sec  
TDO 1

===== CHANNEL f1 =====  
NUC1 1H  
P1 9.50 usec  
PL1 0.00 dB  
SFO1 300.1318534 MHz  
SI 32768  
SF 300.1300059 MHz  
WDW EM  
SSB 0  
LB 0.30 Hz  
GB 0  
PC 1.00

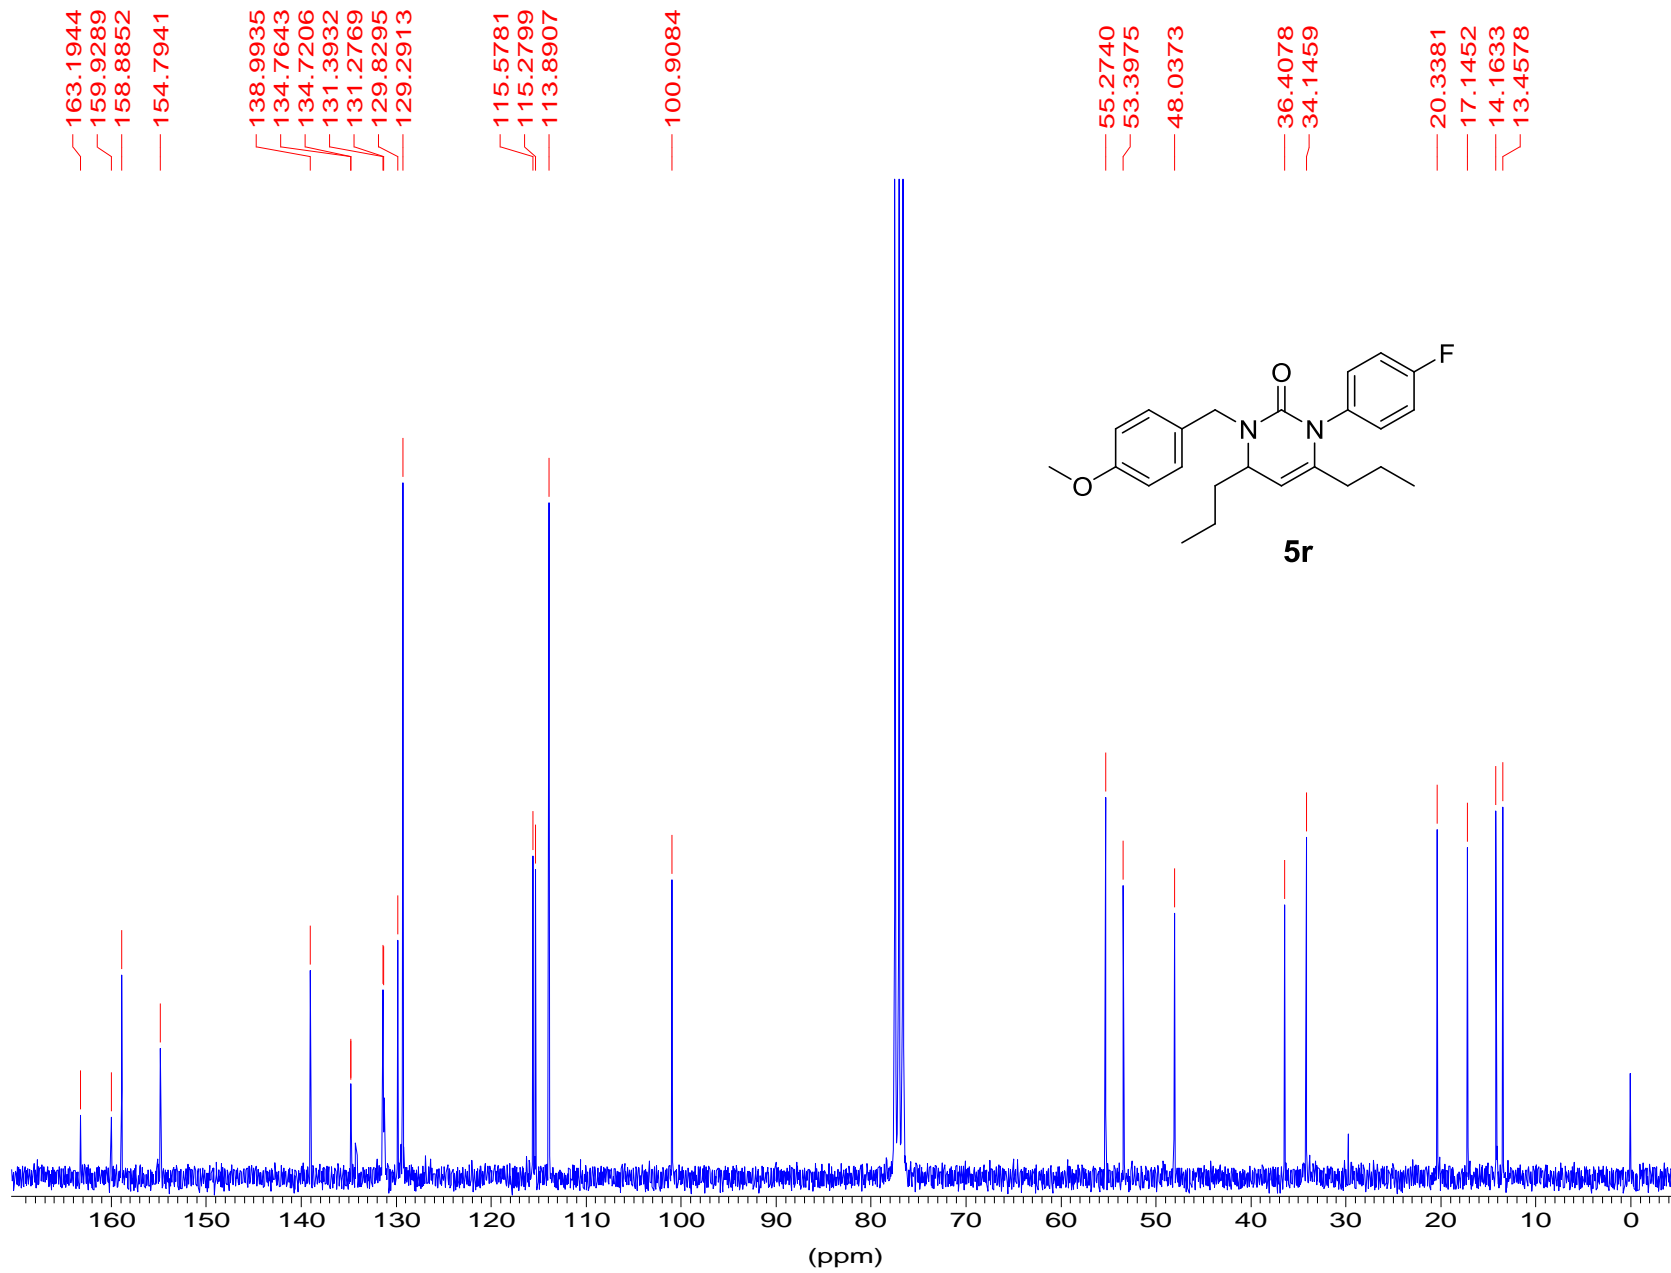

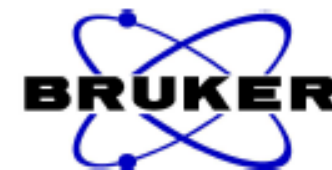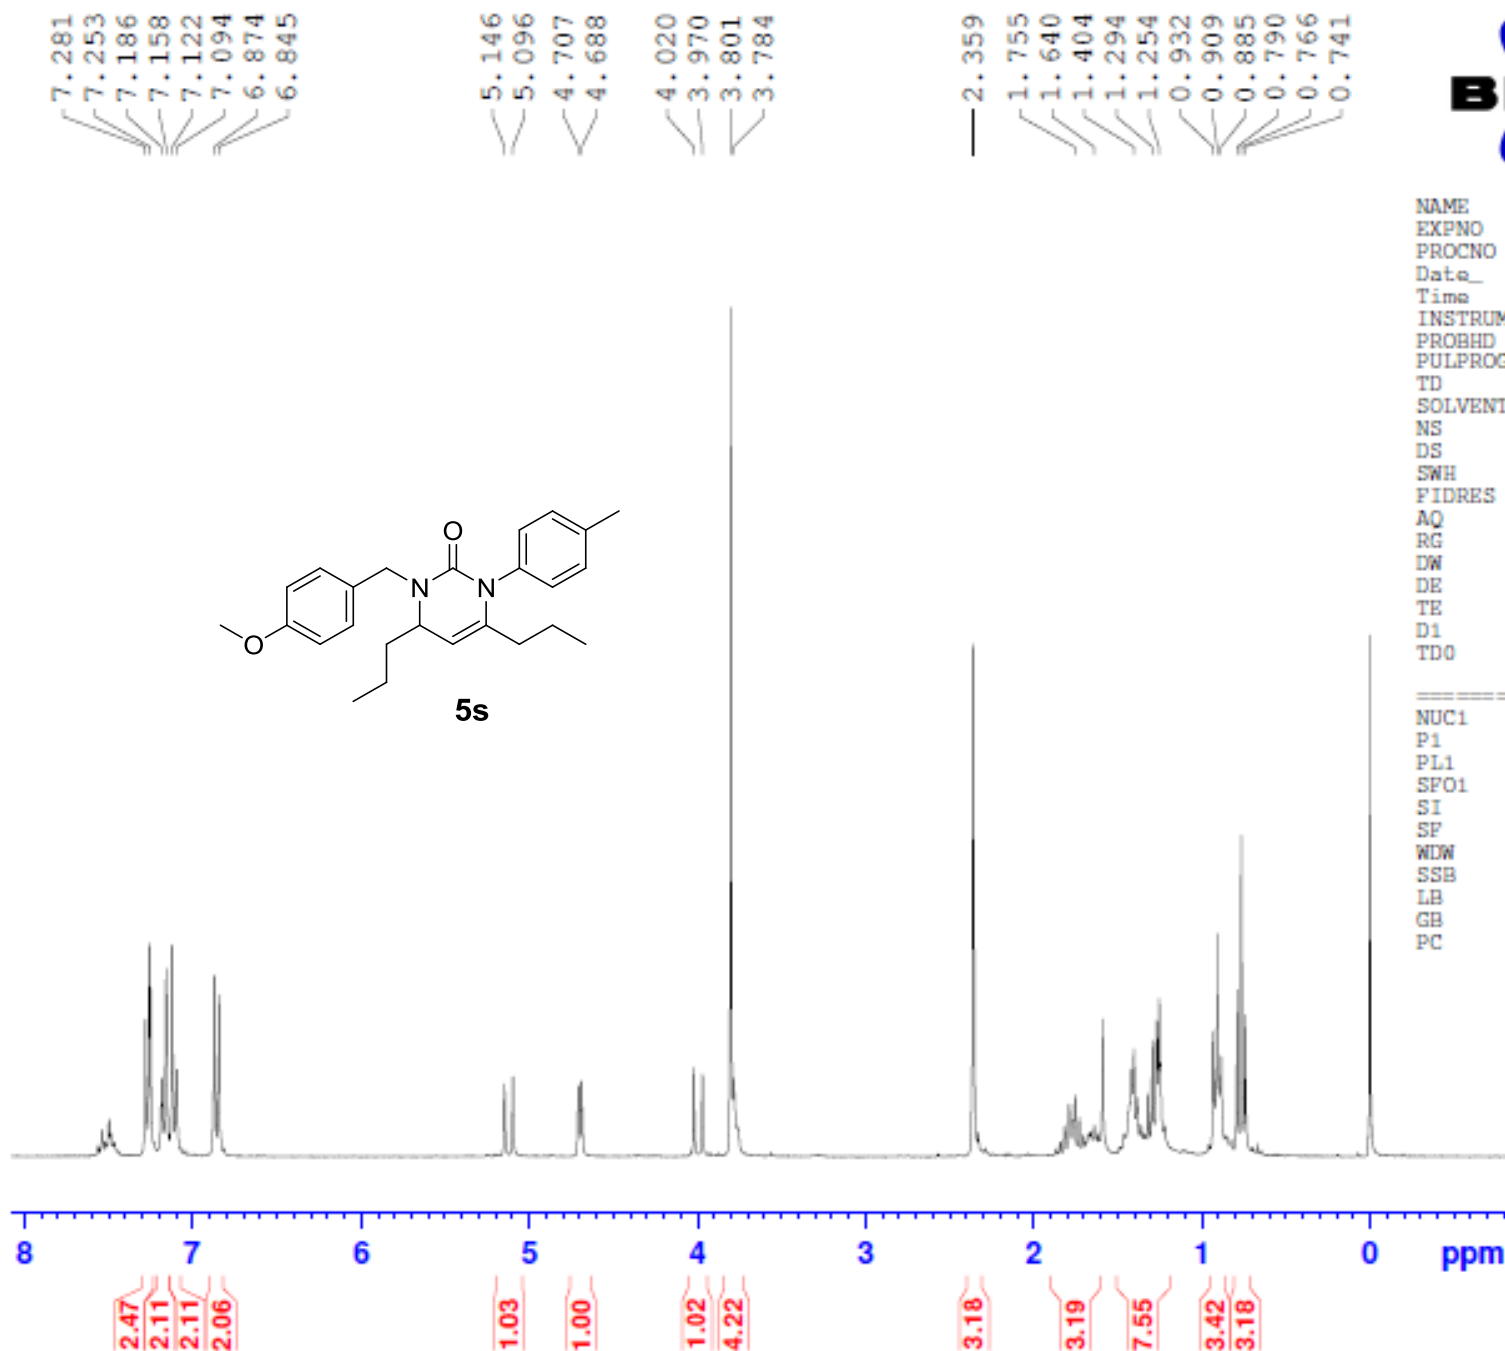

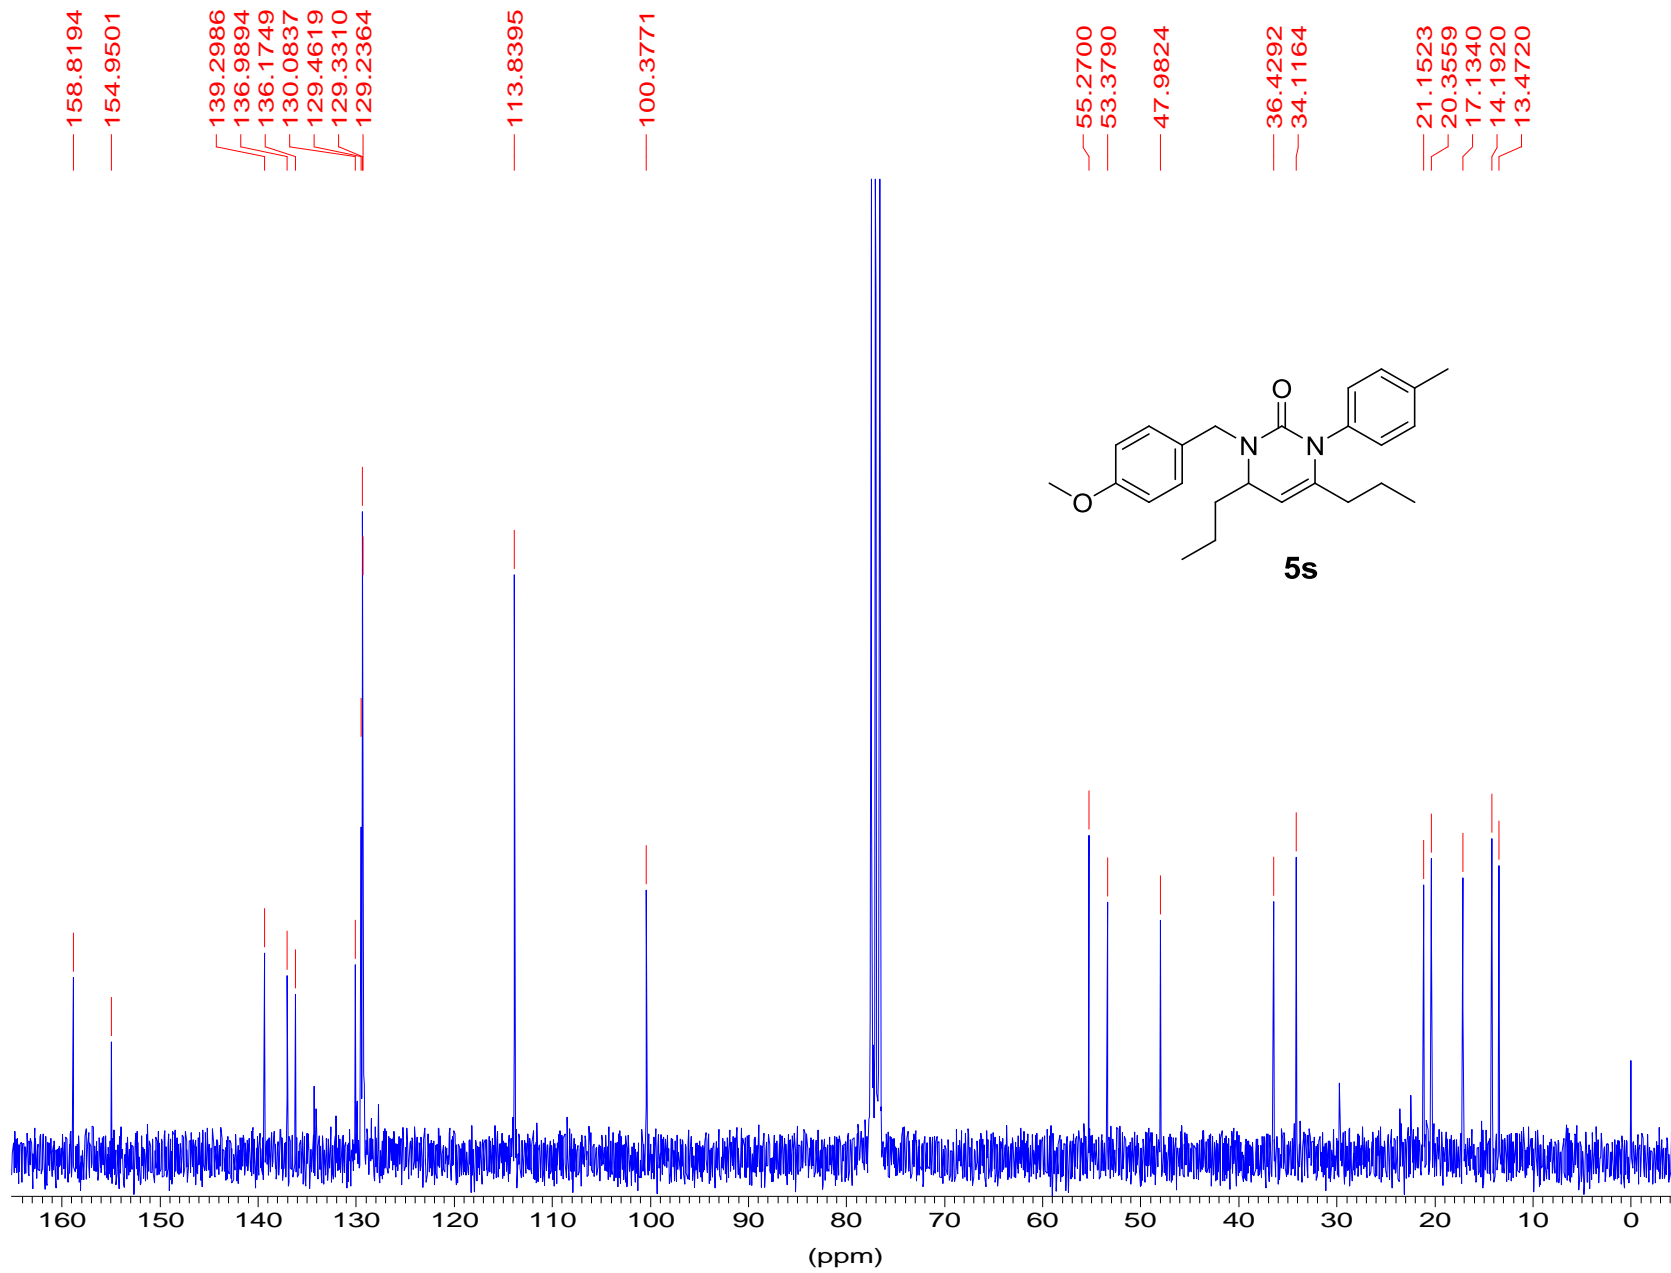

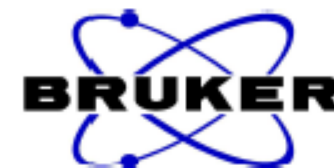

NAME OP317b2  
EXPNO 30  
PROCNO 1  
Date\_ 20121127  
Time 9.13  
INSTRUM spect  
PROBHD 5 mm BBO BB-1H  
PULPROG zg30  
TD 32768  
SOLVENT CDC13  
NS 16  
DS 2  
SWH 6172.839 Hz  
FIDRES 0.188380 Hz  
AQ 2.6542580 sec  
RG 456.1  
DW 81.000 usec  
DE 6.50 usec  
TE 296.7 K  
D1 1.00000000 sec  
TDO 1

===== CHANNEL f1 =====  
NUC1 1H  
P1 9.50 usec  
PL1 0.00 dB  
SFO1 300.1318534 MHz  
SI 32768  
SF 300.1300072 MHz  
WDW EM  
SSB 0  
LB 0.30 Hz  
GB 0  
PC 1.00

7.252  
7.107  
6.892  
6.863  
6.836

4.897

3.810  
3.677

2.238  
2.213

1.729

0.904  
0.882

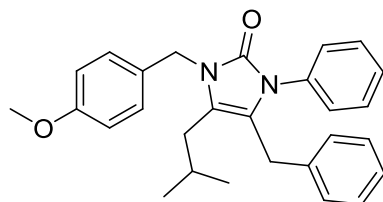

21

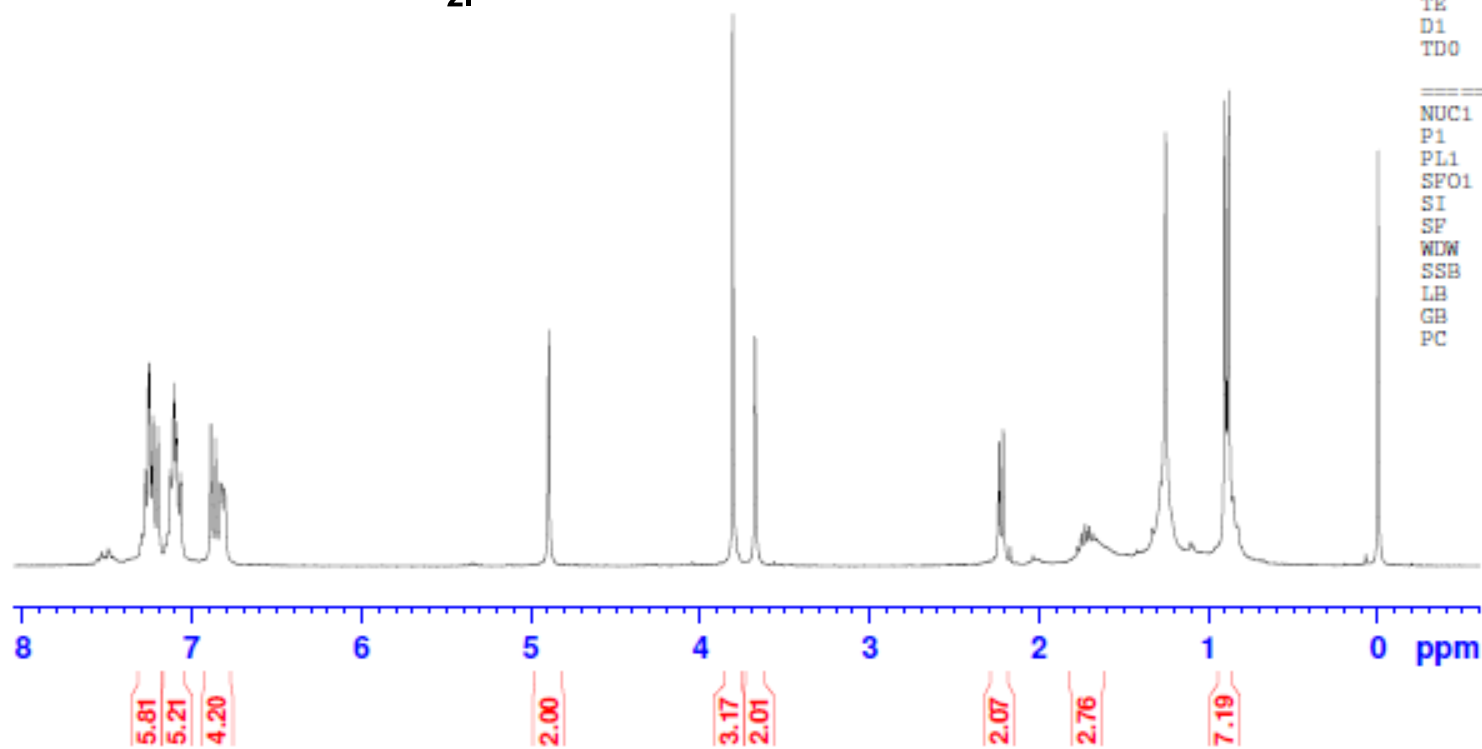



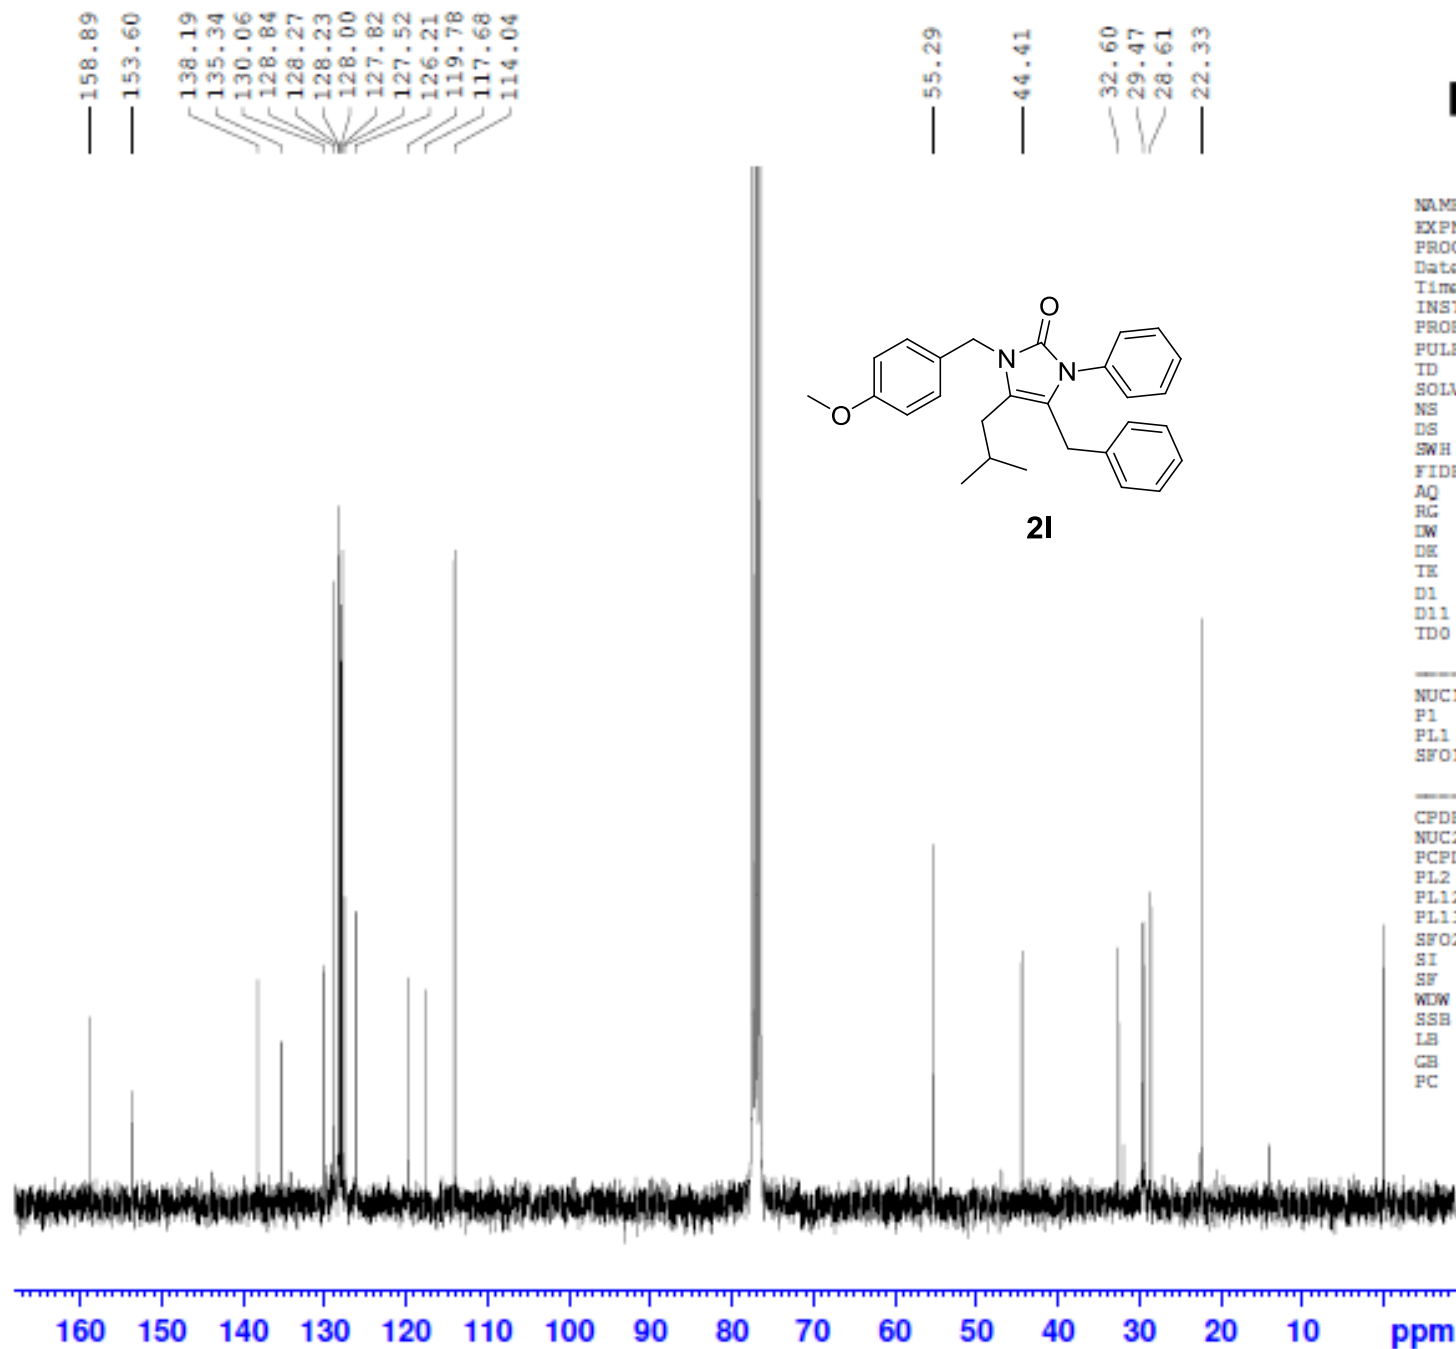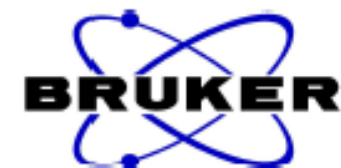

```
NAME          OP317b2
EXPNO         31
PROCNO        1
Data_         20121130
Time          16.03
INSTRUM       spect
PROBHD        5 mm BBO BB-1H
PULPROG       zgpg30
TD            65536
SOLVENT       CDC13
NS            4096
DS            4
SWH           17985.611 Hz
FIDRES        0.274439 Hz
AQ            1.8219508 sec
RG            32768
DW            27.800 usec
DE            6.50 usec
TE            298.4 K
D1            1.75000000 sec
D11           0.03000000 sec
TD0           1
```

```
----- CHANNEL f1 -----
NUC1          13C
P1            8.25 usec
PL1           0.00 dB
SFO1          75.4752953 MHz
```

```
----- CHANNEL f2 -----
CPDPRG2      waltz16
NUC2          1H
PCPD2        80.00 usec
PL2           0.00 dB
PL12         18.51 dB
PL13         20.00 dB
SFO2         300.1312005 MHz
SI           65536
SF           75.4677495 MHz
WDW          EM
SSB           0
LB            1.00 Hz
GB            0
PC            1.40
```

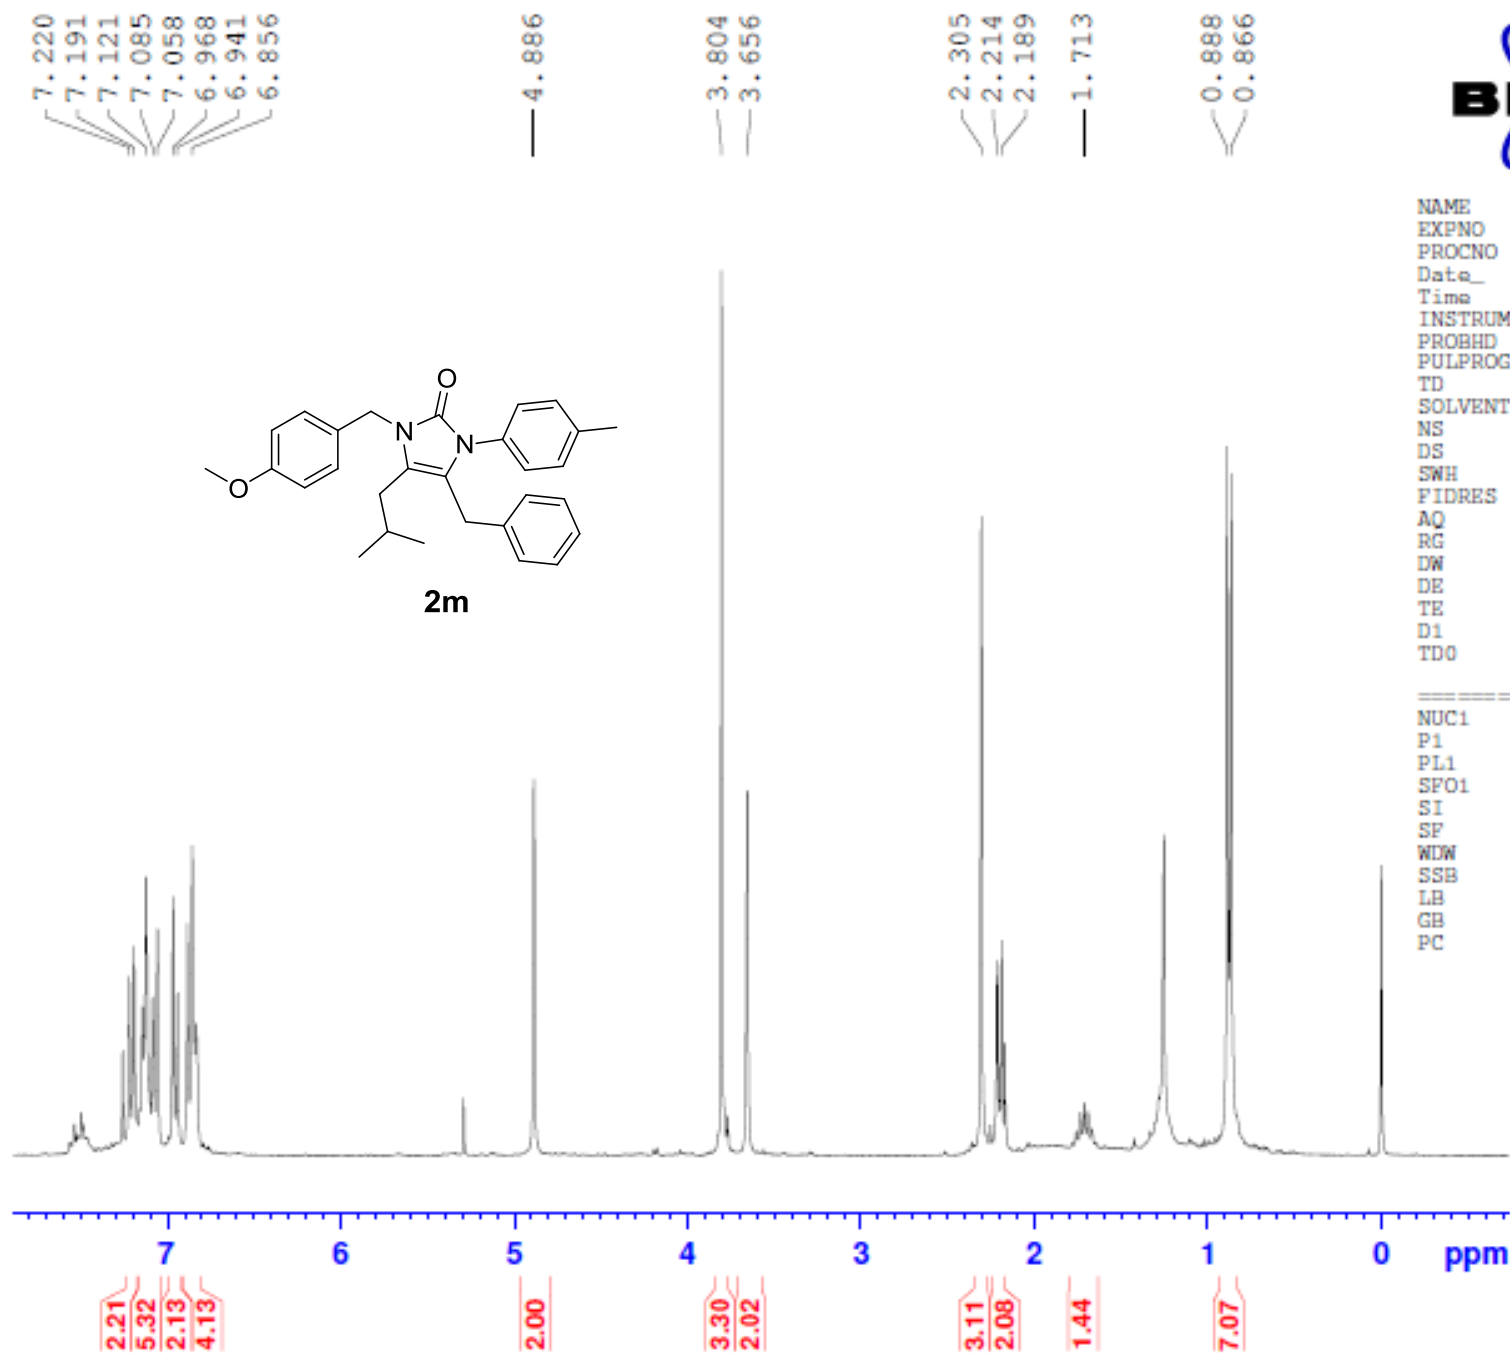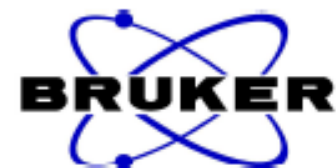

NAME OP318-2  
EXPNO 30  
PROCNO 1  
Date\_ 20121130  
Time 4.58  
INSTRUM spect  
PROBHD 5 mm BBO BB-1H  
PULPROG zg30  
TD 32768  
SOLVENT CDCl3  
NS 16  
DS 2  
SWH 6172.839 Hz  
FIDRES 0.188380 Hz  
AQ 2.6542580 sec  
RG 322.5  
DW 81.000 usec  
DE 6.50 usec  
TE 296.8 K  
D1 1.00000000 sec  
TDO 1

==== CHANNEL f1 =====  
NUC1 1H  
P1 9.50 usec  
PL1 0.00 dB  
SFO1 300.1318534 MHz  
SI 32768  
SF 300.1300077 MHz  
WDW EM  
SSB 0  
LB 0.30 Hz  
GB 0  
PC 1.00

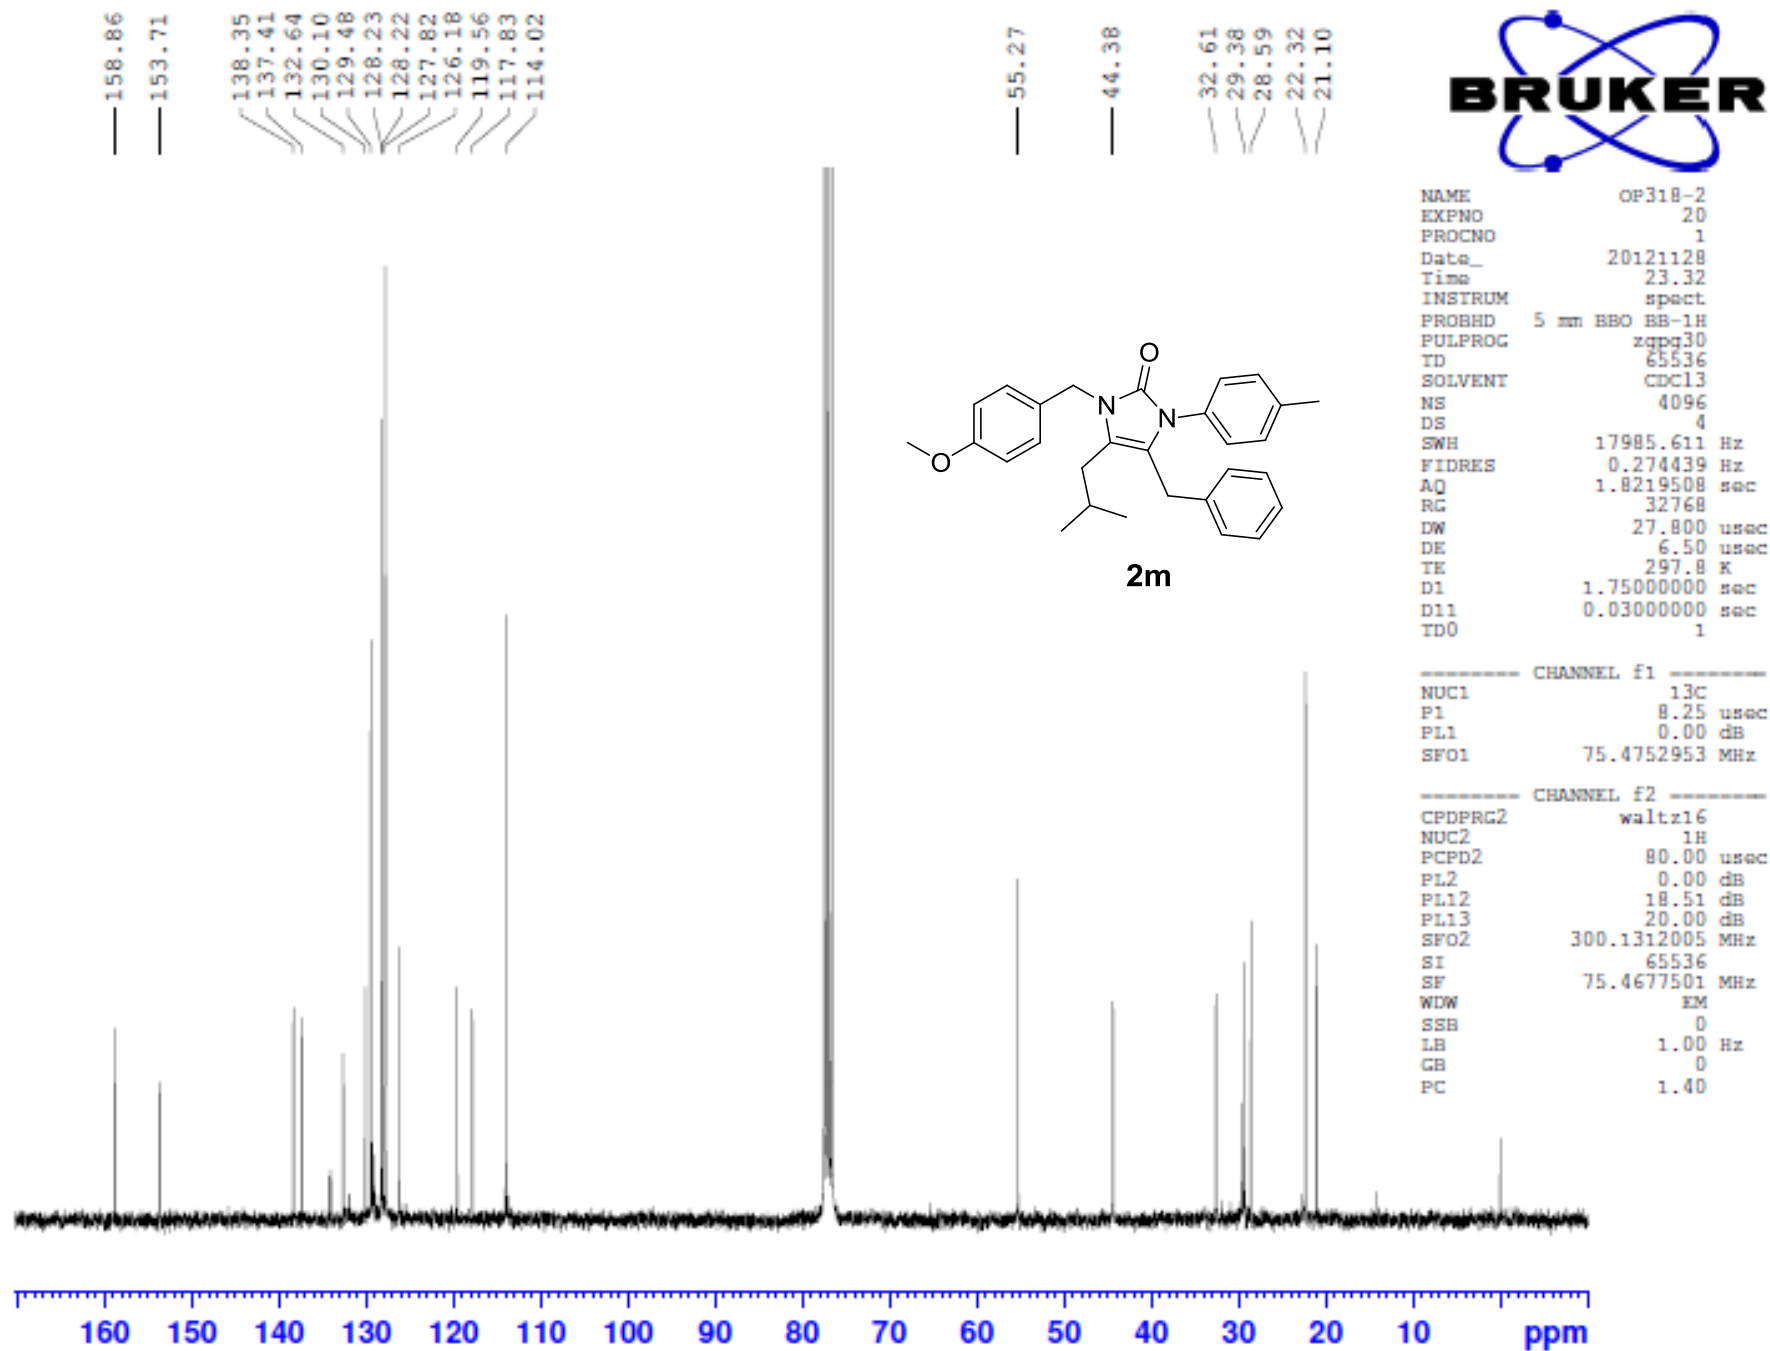

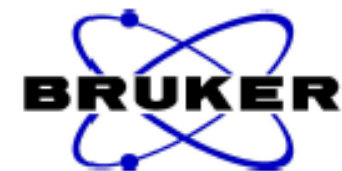

NAME op333r2-5  
EXPNO 23  
PROCNO 1  
Date\_ 20130206  
Time 11.41  
INSTRUM spect  
PROBHD 5 mm BBO BB-1H  
PULPROG zg30  
TD 32768  
SOLVENT CDC13  
NS 16  
DS 2  
SWH 6172.839 Hz  
FIDRES 0.188380 Hz  
AQ 2.6542580 sec  
RG 574.7  
DW 81.000 usec  
DE 6.50 usec  
TE 296.8 K  
D1 1.00000000 sec  
TD0 1

===== CHANNEL f1 =====  
NUC1 1H  
P1 9.50 usec  
PL1 0.00 dB  
SFO1 300.1318534 MHz  
SI 32768  
SF 300.1300096 MHz  
WDW EM  
SSB 0  
LB 0.30 Hz  
GB 0  
PC 1.00

7.268  
7.221  
7.145  
7.066  
6.716

4.849

3.652

2.373

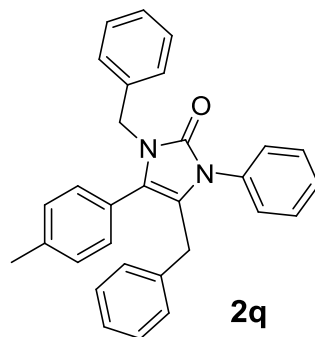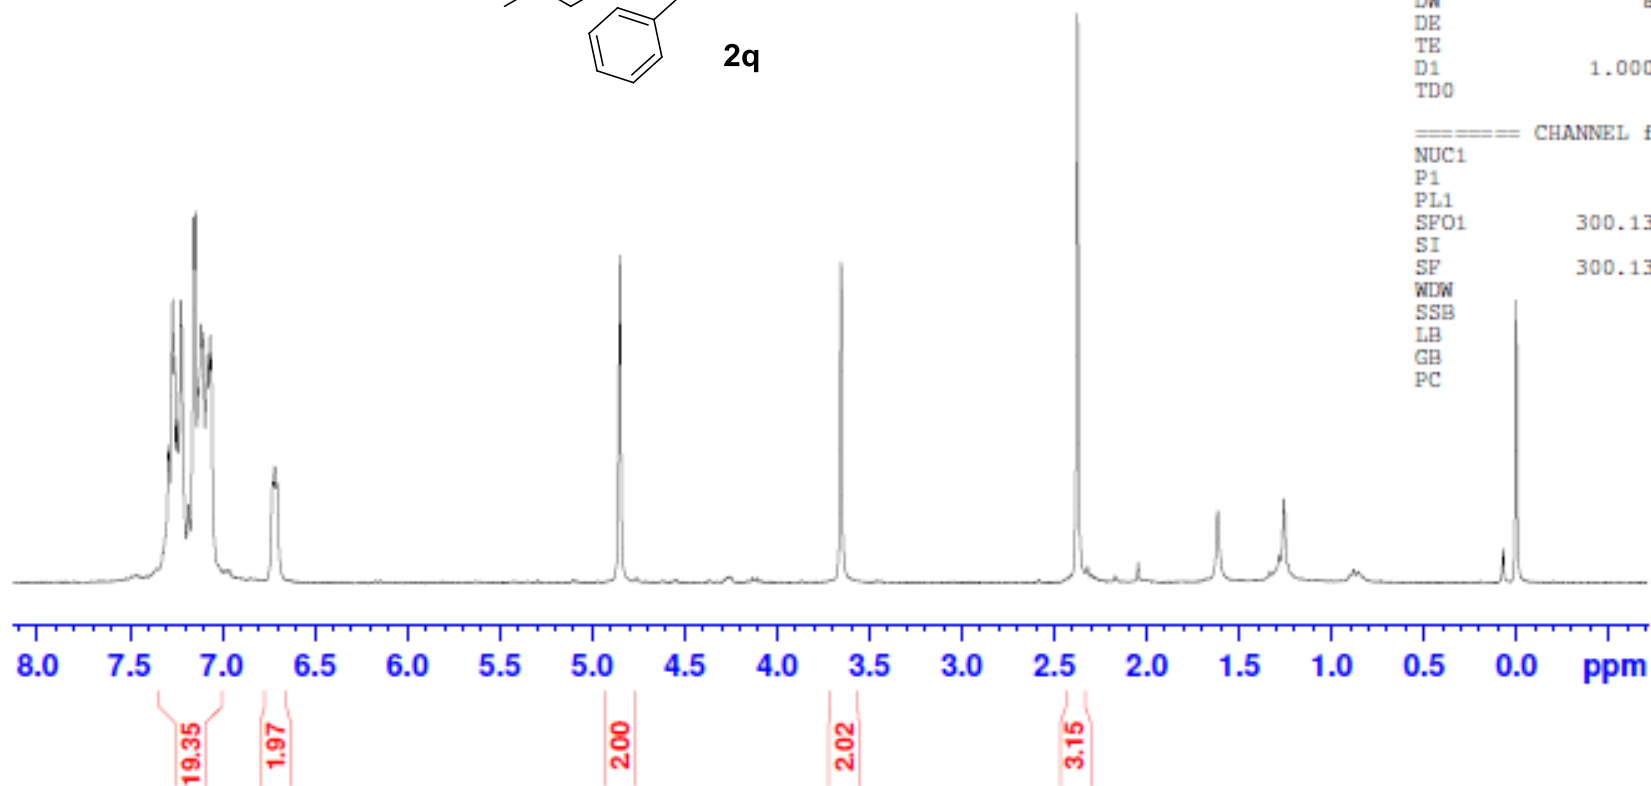

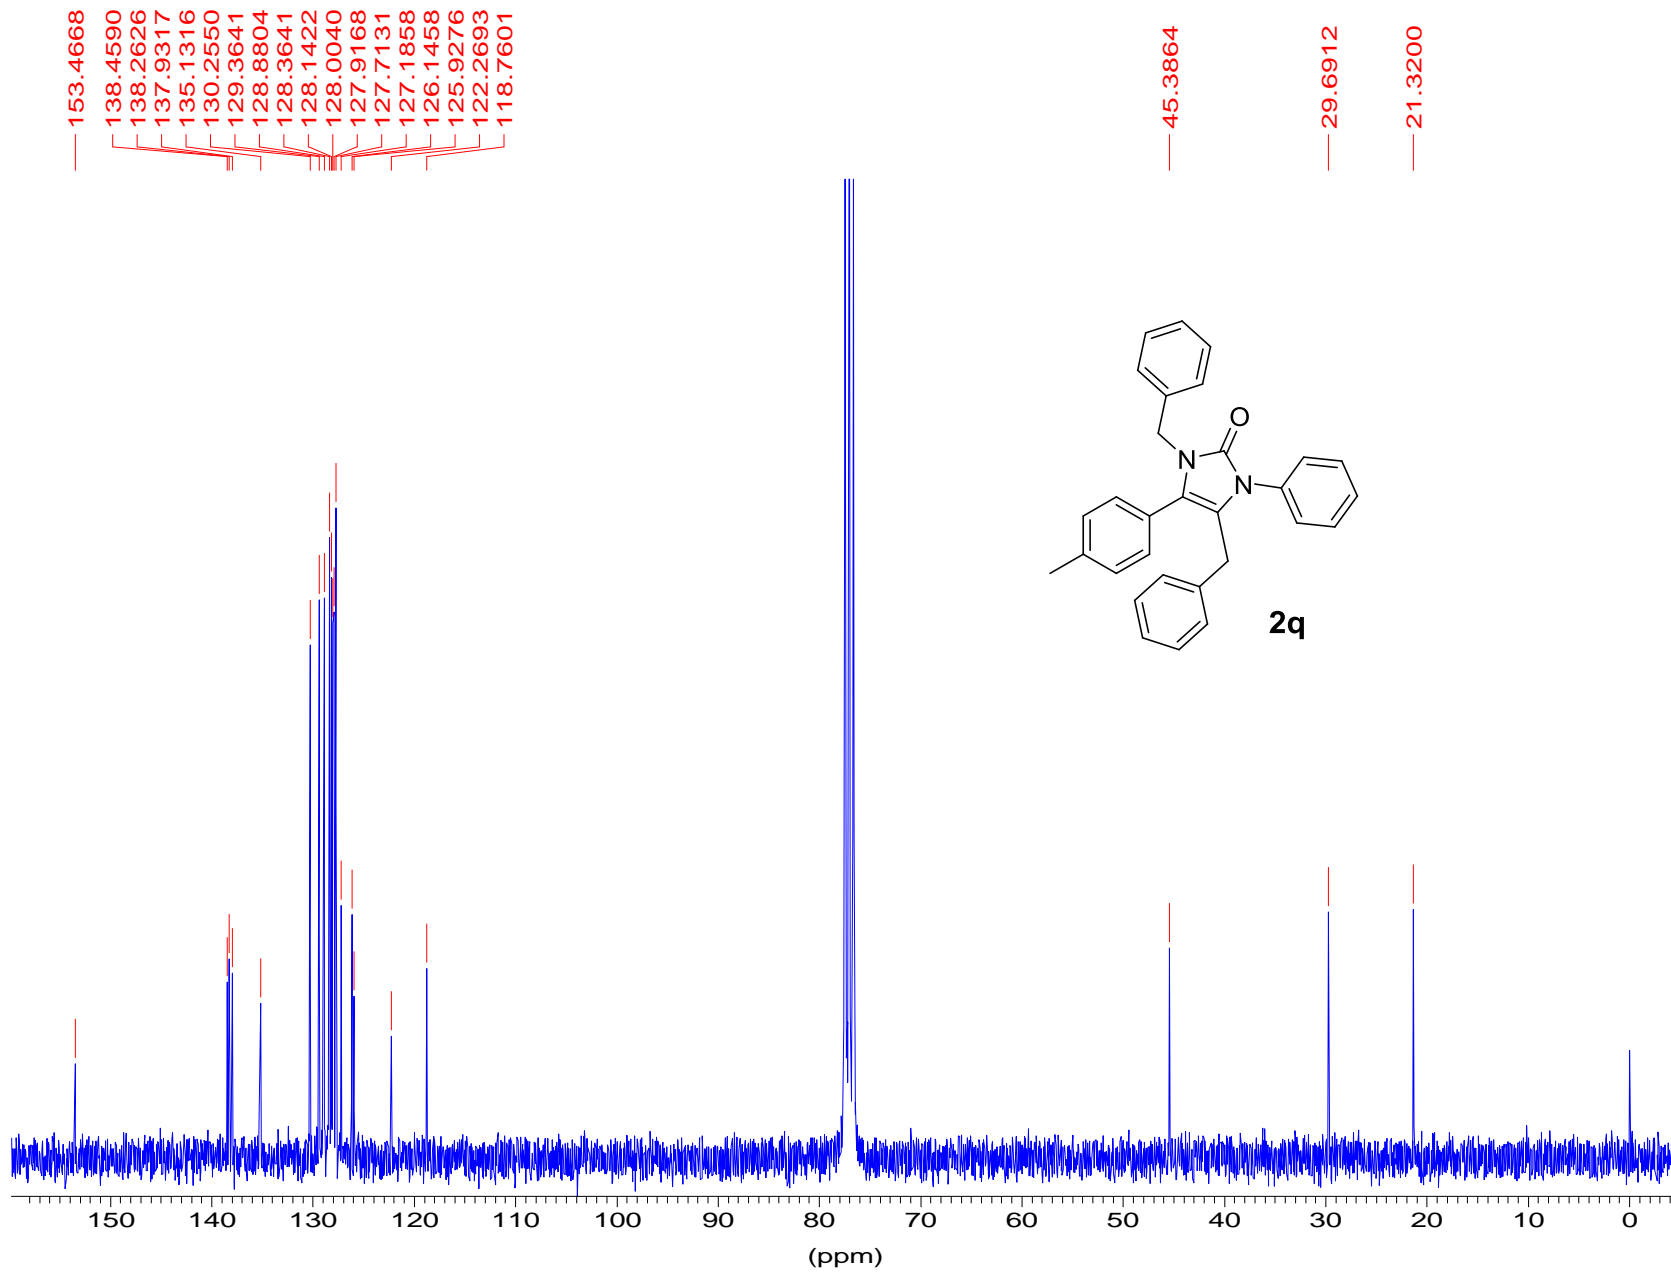

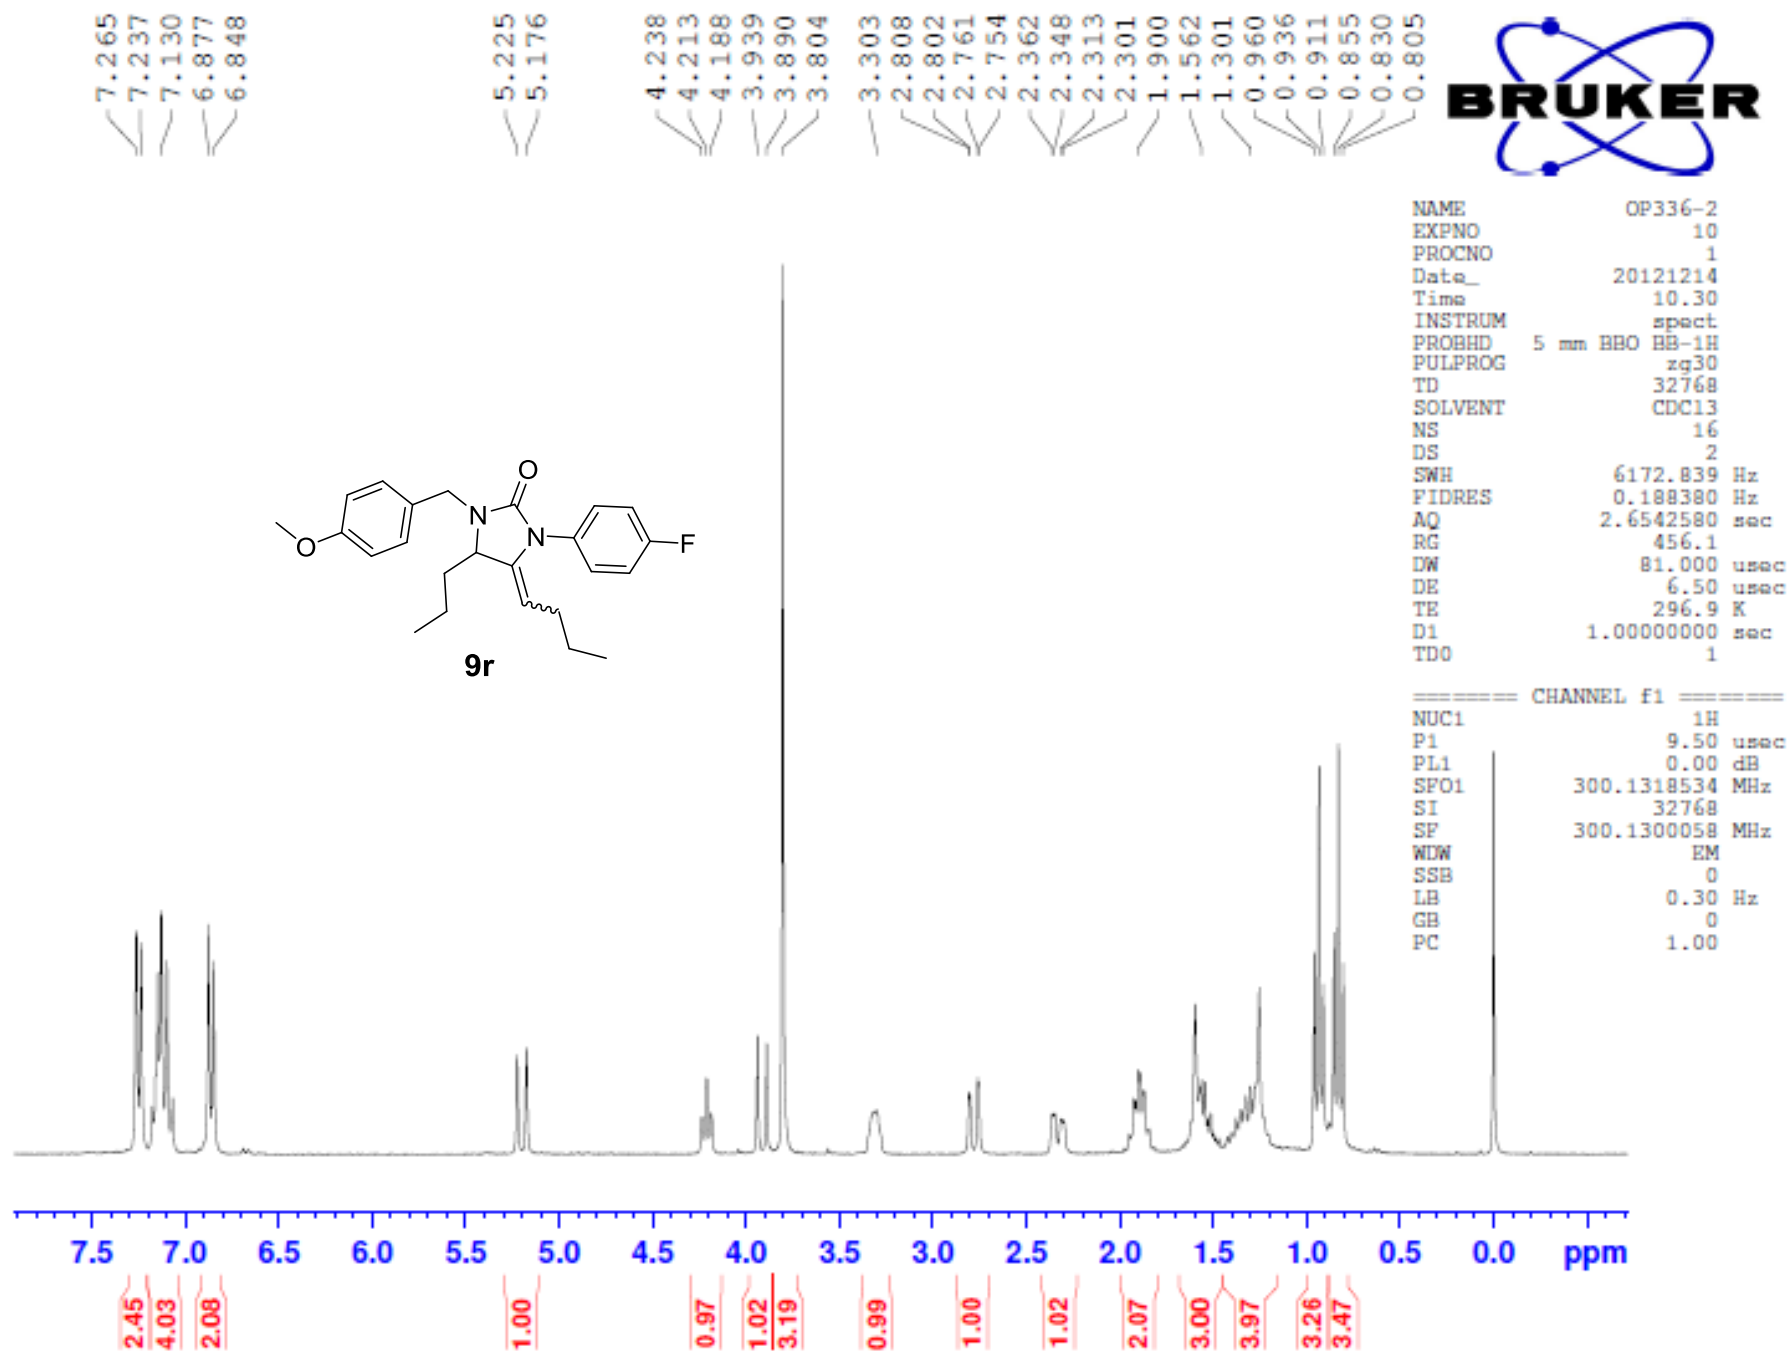

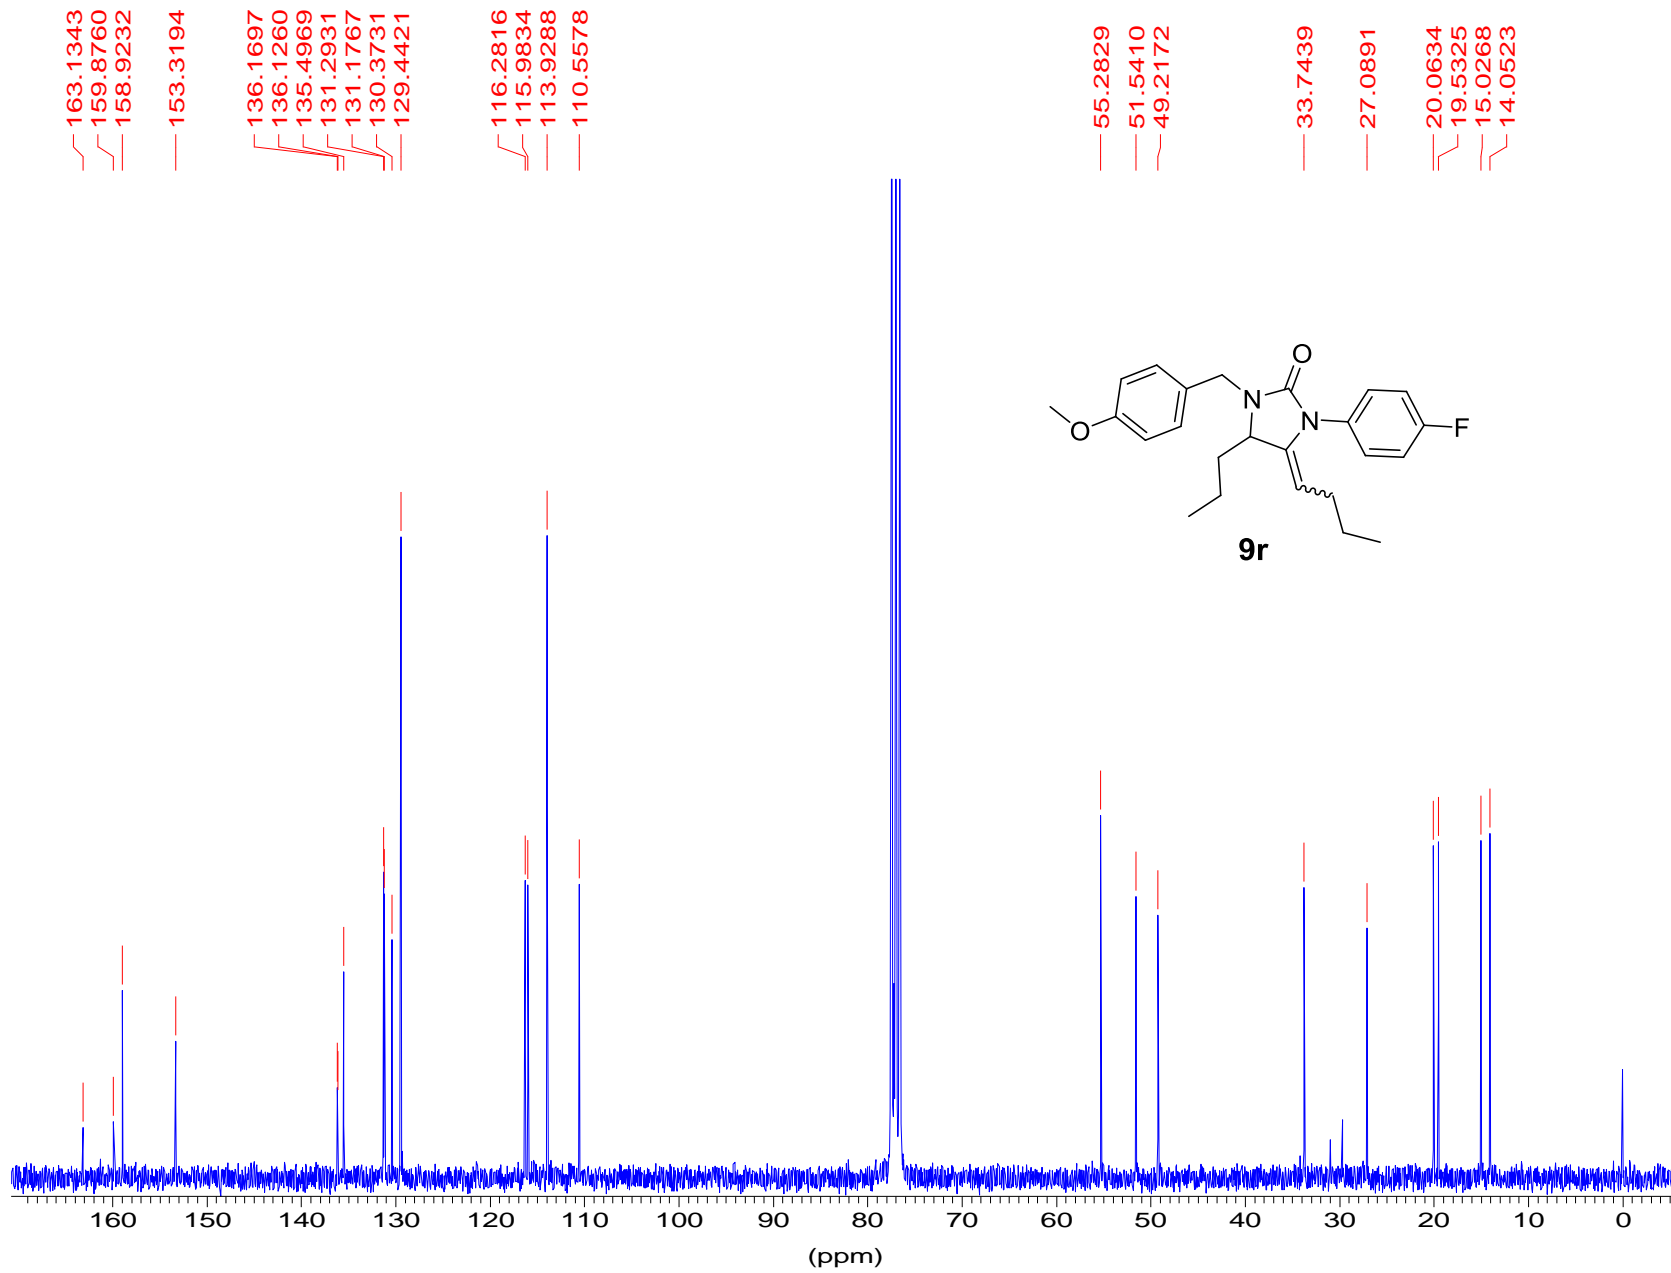

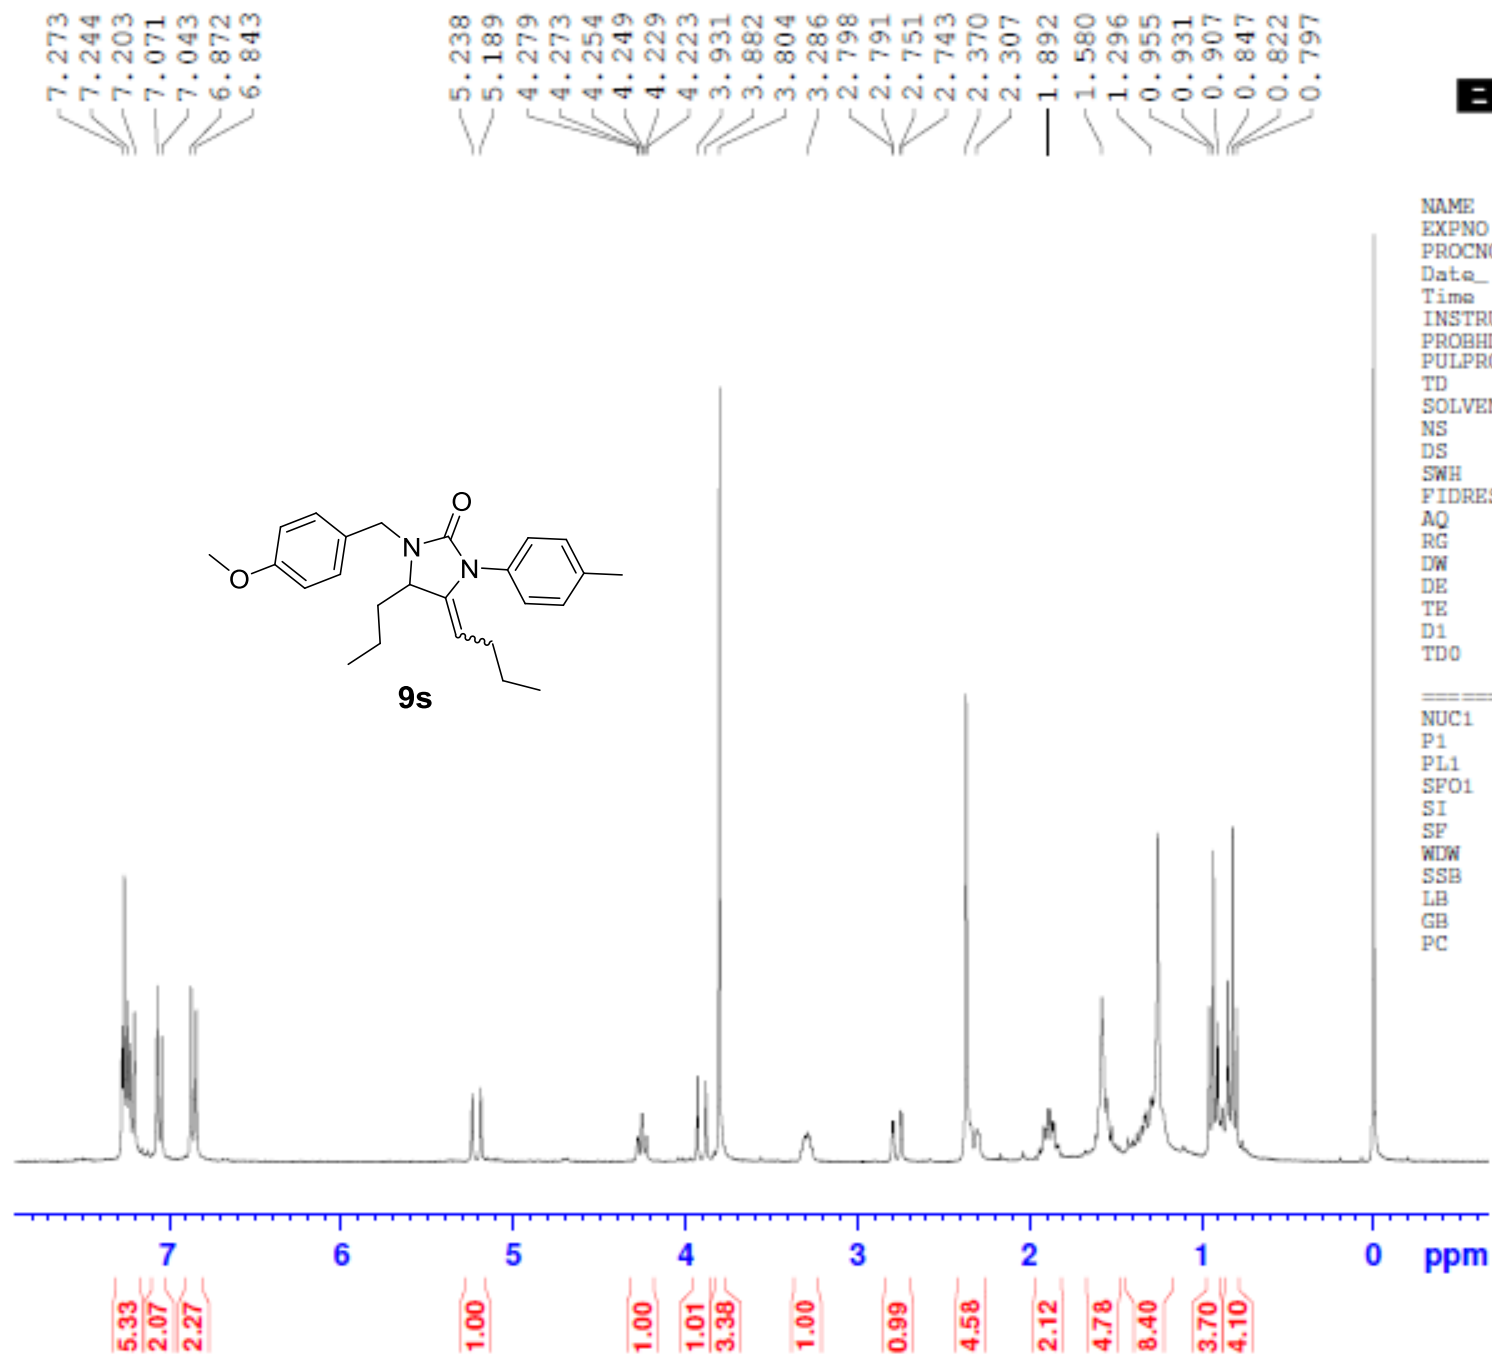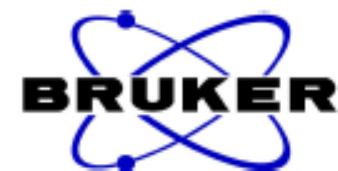

NAME OP335-2  
EXPNO 20  
PROCNO 1  
Date\_ 20121219  
Time 5.20  
INSTRUM spect  
PROBHD 5 mm BBO BB-1H  
PULPROG zg30  
TD 32768  
SOLVENT CDCl3  
NS 16  
DS 2  
SWH 6172.839 Hz  
FIDRES 0.188380 Hz  
AQ 2.6542580 sec  
RG 574.7  
DW 81.000 usec  
DE 6.50 usec  
TE 296.7 K  
D1 1.00000000 sec  
TD0 1

==== CHANNEL f1 =====  
NUC1 1H  
P1 9.50 usec  
PL1 0.00 dB  
SFO1 300.1318534 MHz  
SI 32768  
SF 300.1300061 MHz  
WDW EM  
SSB 0  
LB 0.30 Hz  
GB 0  
PC 1.00



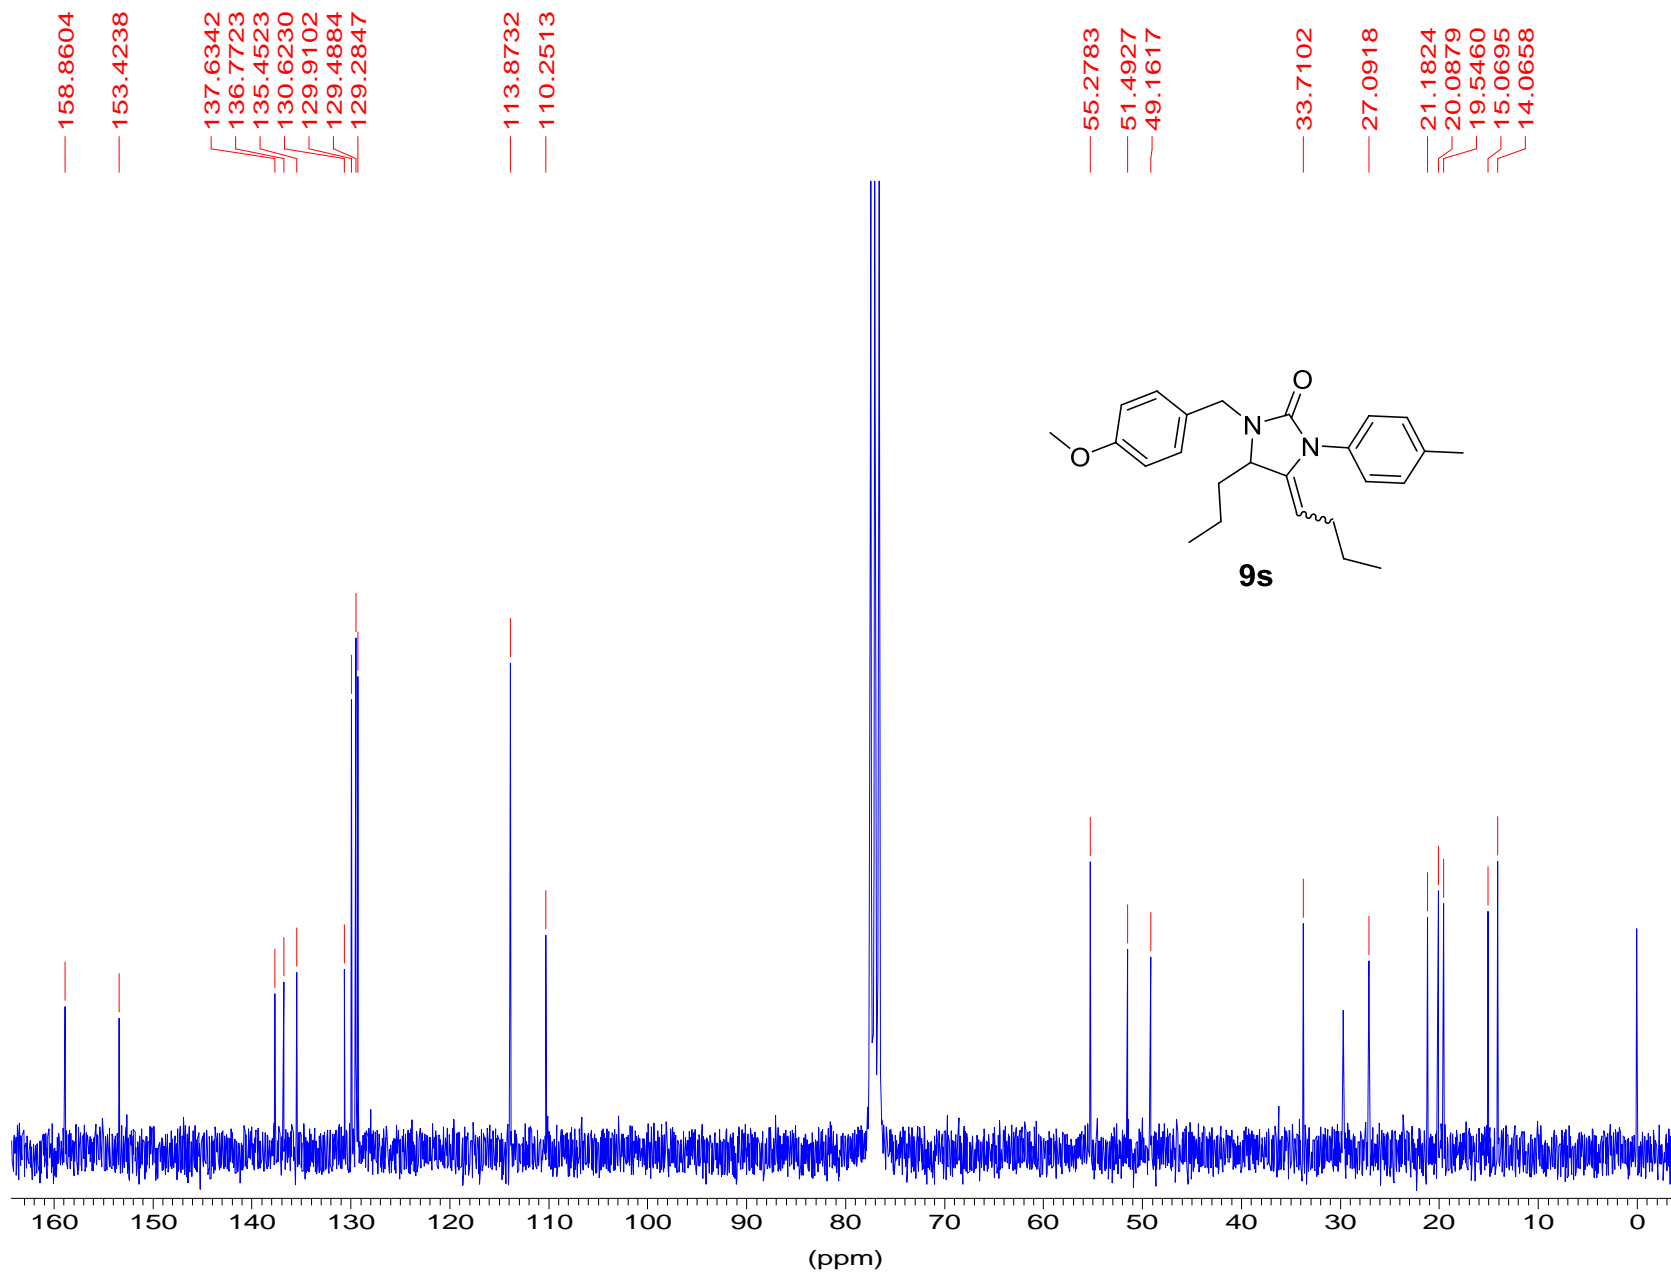

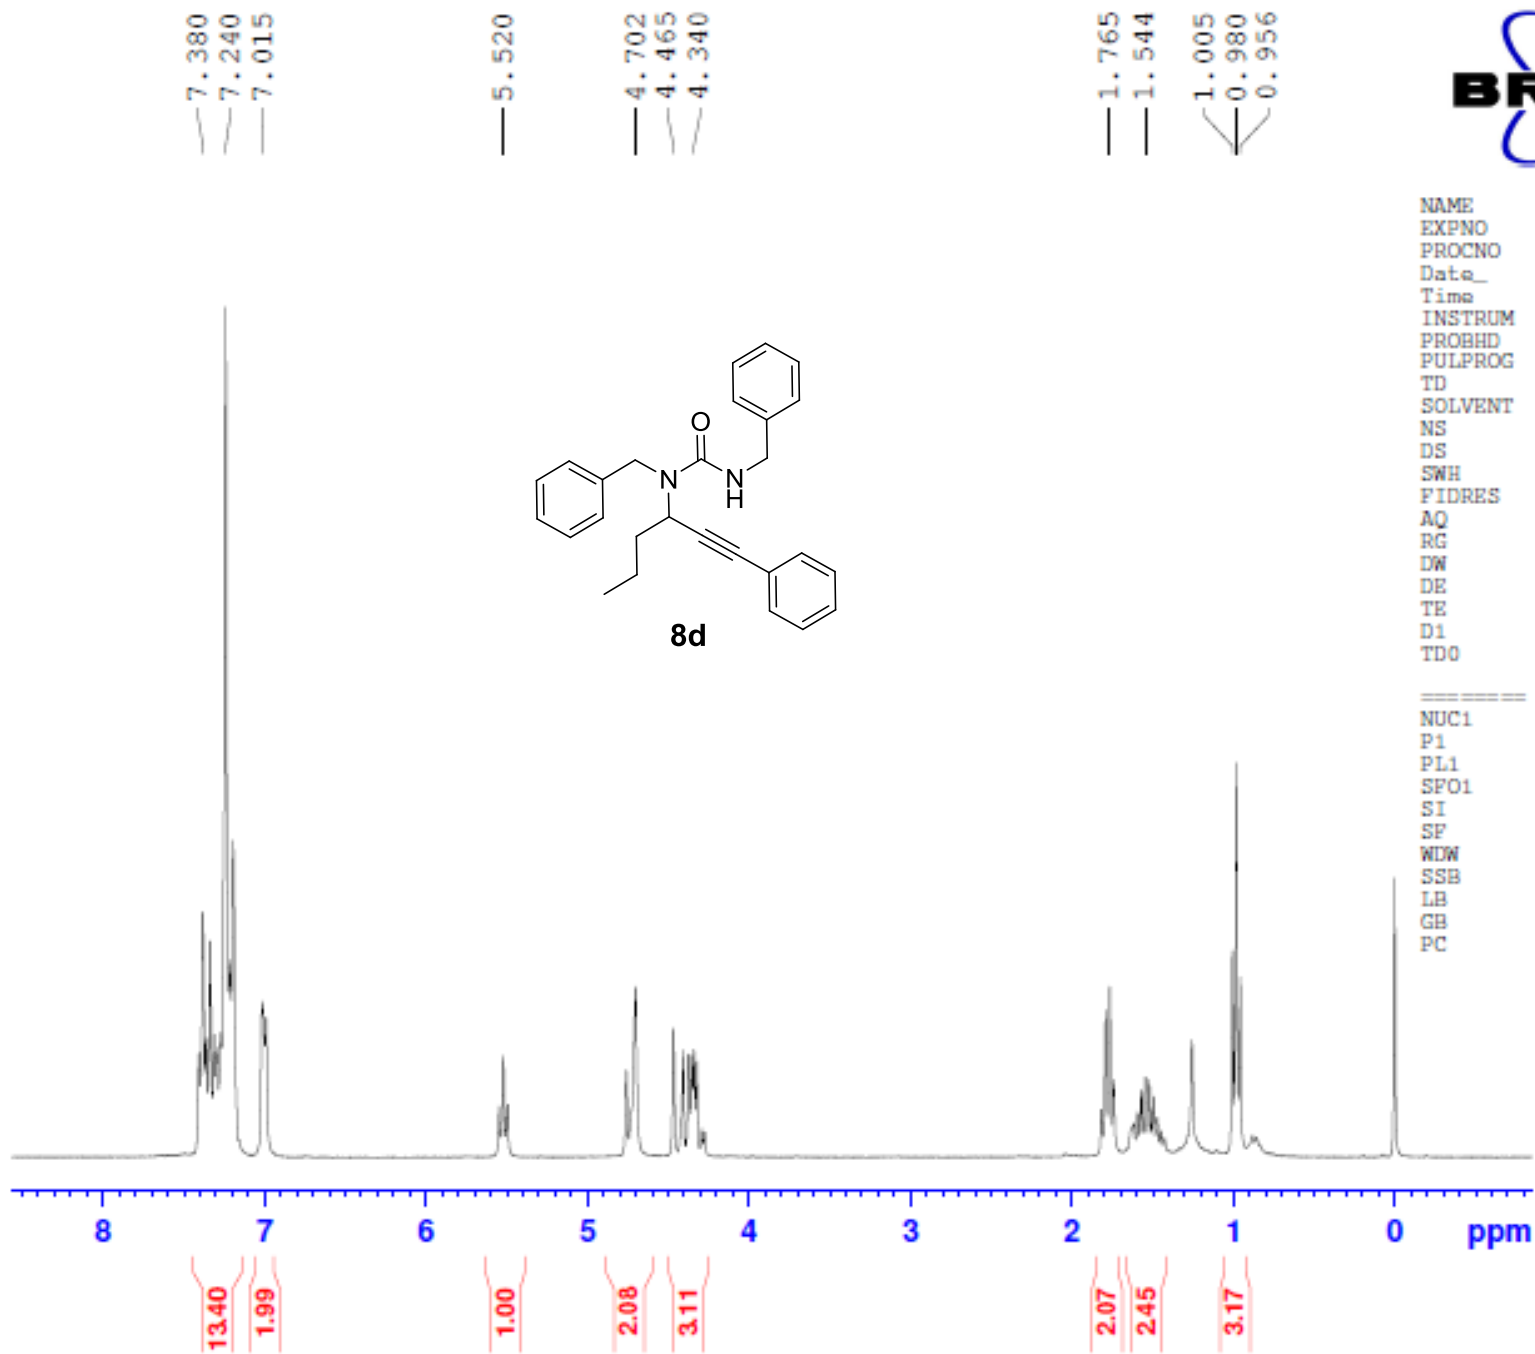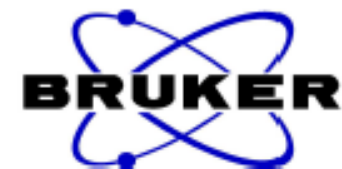

NAME PVureal  
EXPNO 20  
PROCNO 1  
Date\_ 20130125  
Time 10.26  
INSTRUM spect  
PROBHD 5 mm BBO BB-1H  
PULPROG zg30  
TD 32768  
SOLVENT CDCl3  
NS 16  
DS 2  
SWH 6172.839 Hz  
FIDRES 0.188380 Hz  
AQ 2.6542580 sec  
RG 362  
DW 81.000 usec  
DE 6.50 usec  
TE 296.6 K  
D1 1.00000000 sec  
TDO 1

==== CHANNEL f1 =====  
NUC1 1H  
P1 9.50 usec  
PL1 0.00 dB  
SFO1 300.1318534 MHz  
SI 32768  
SF 300.1300106 MHz  
WDW EM  
SSB 0  
LB 0.30 Hz  
GB 0  
PC 1.00

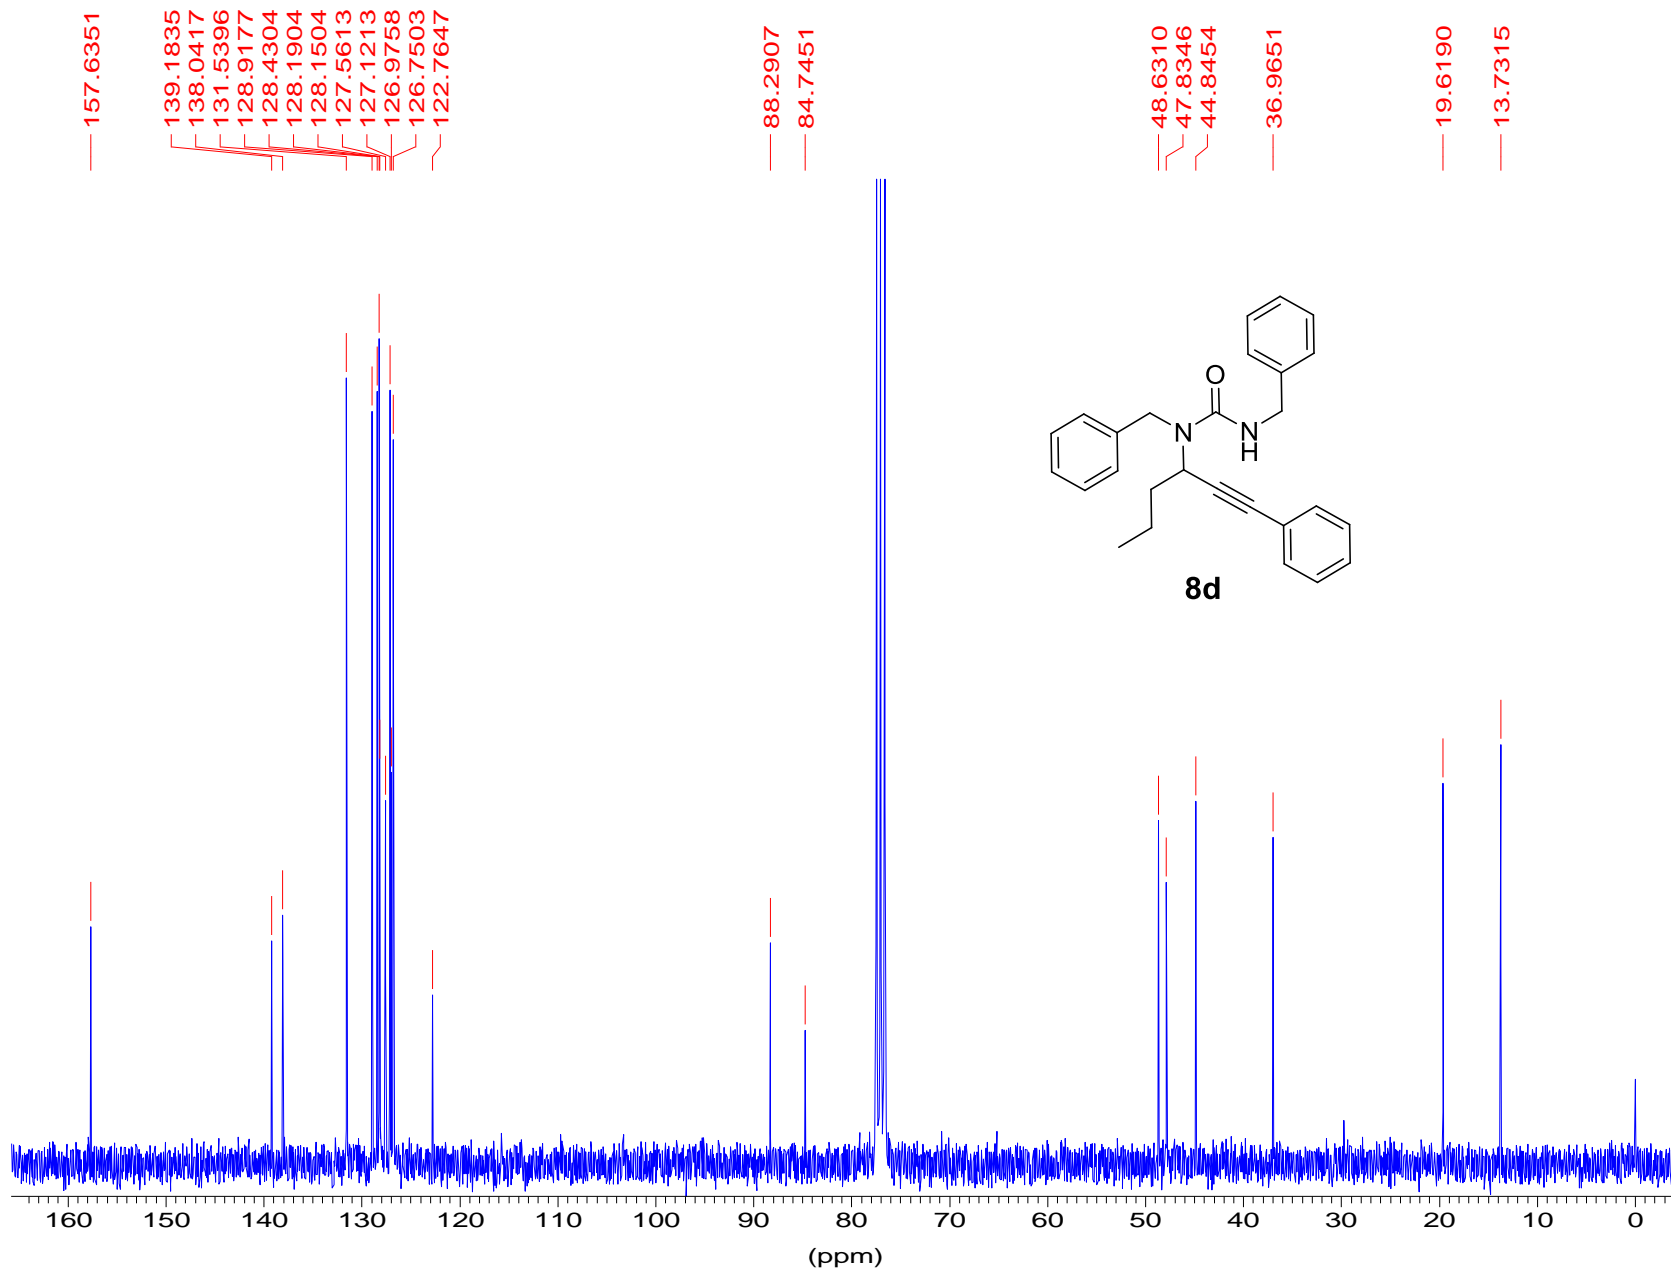

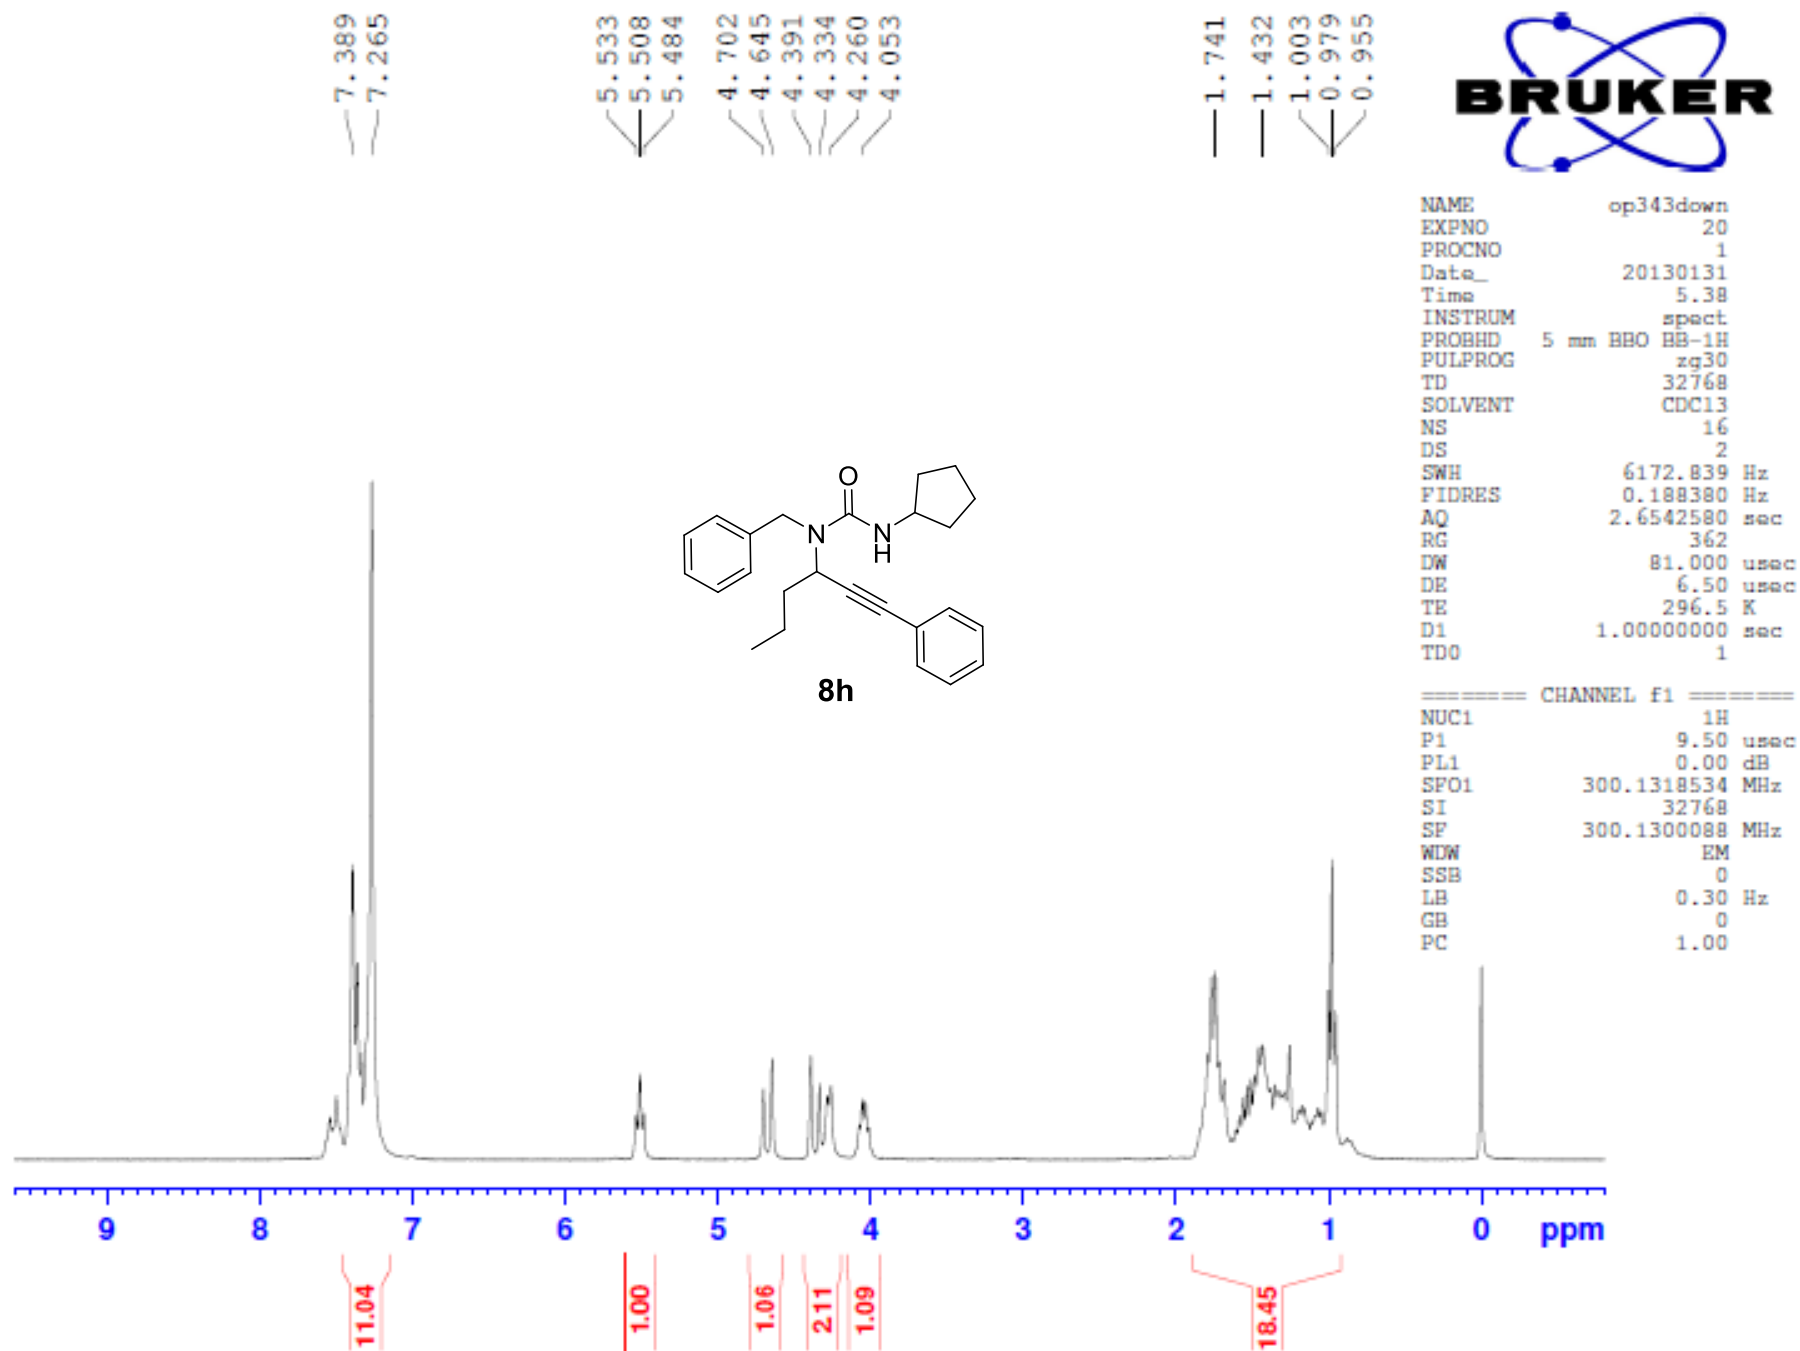

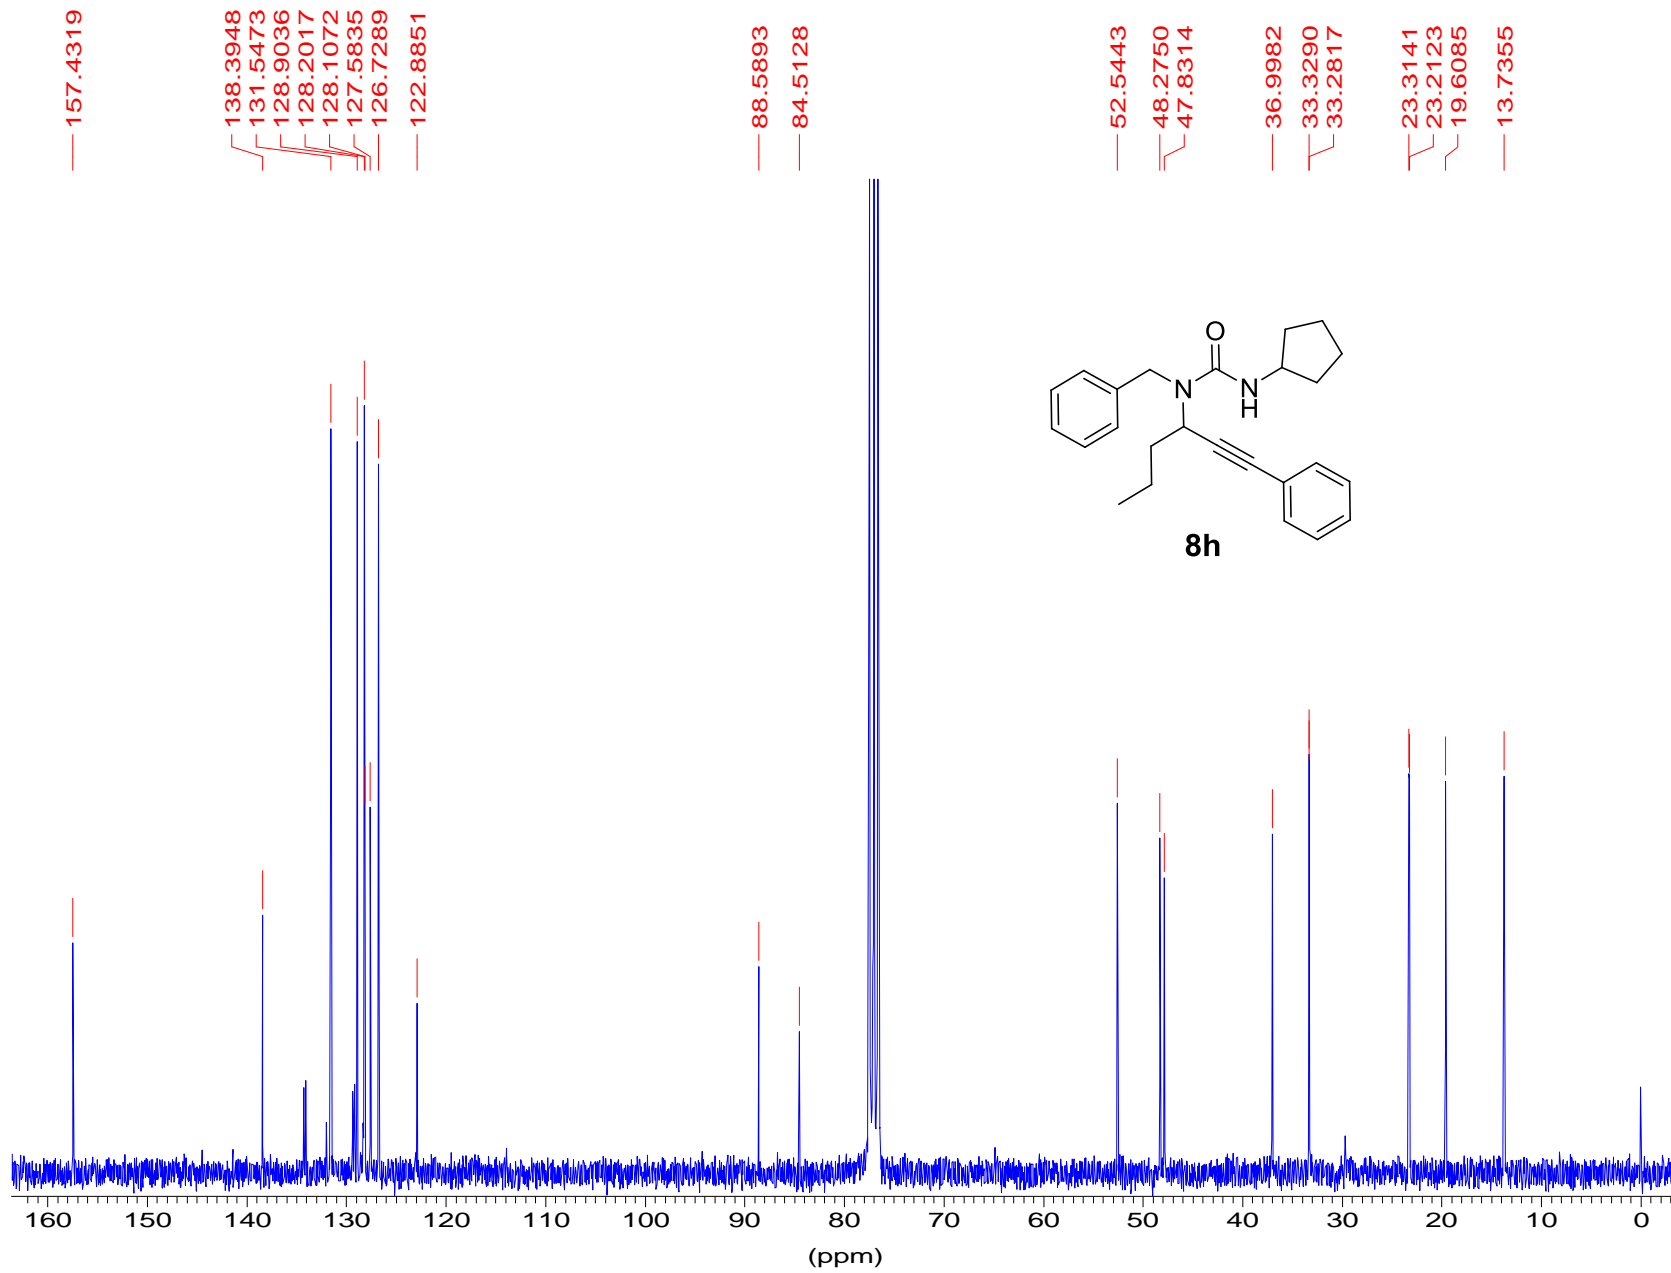

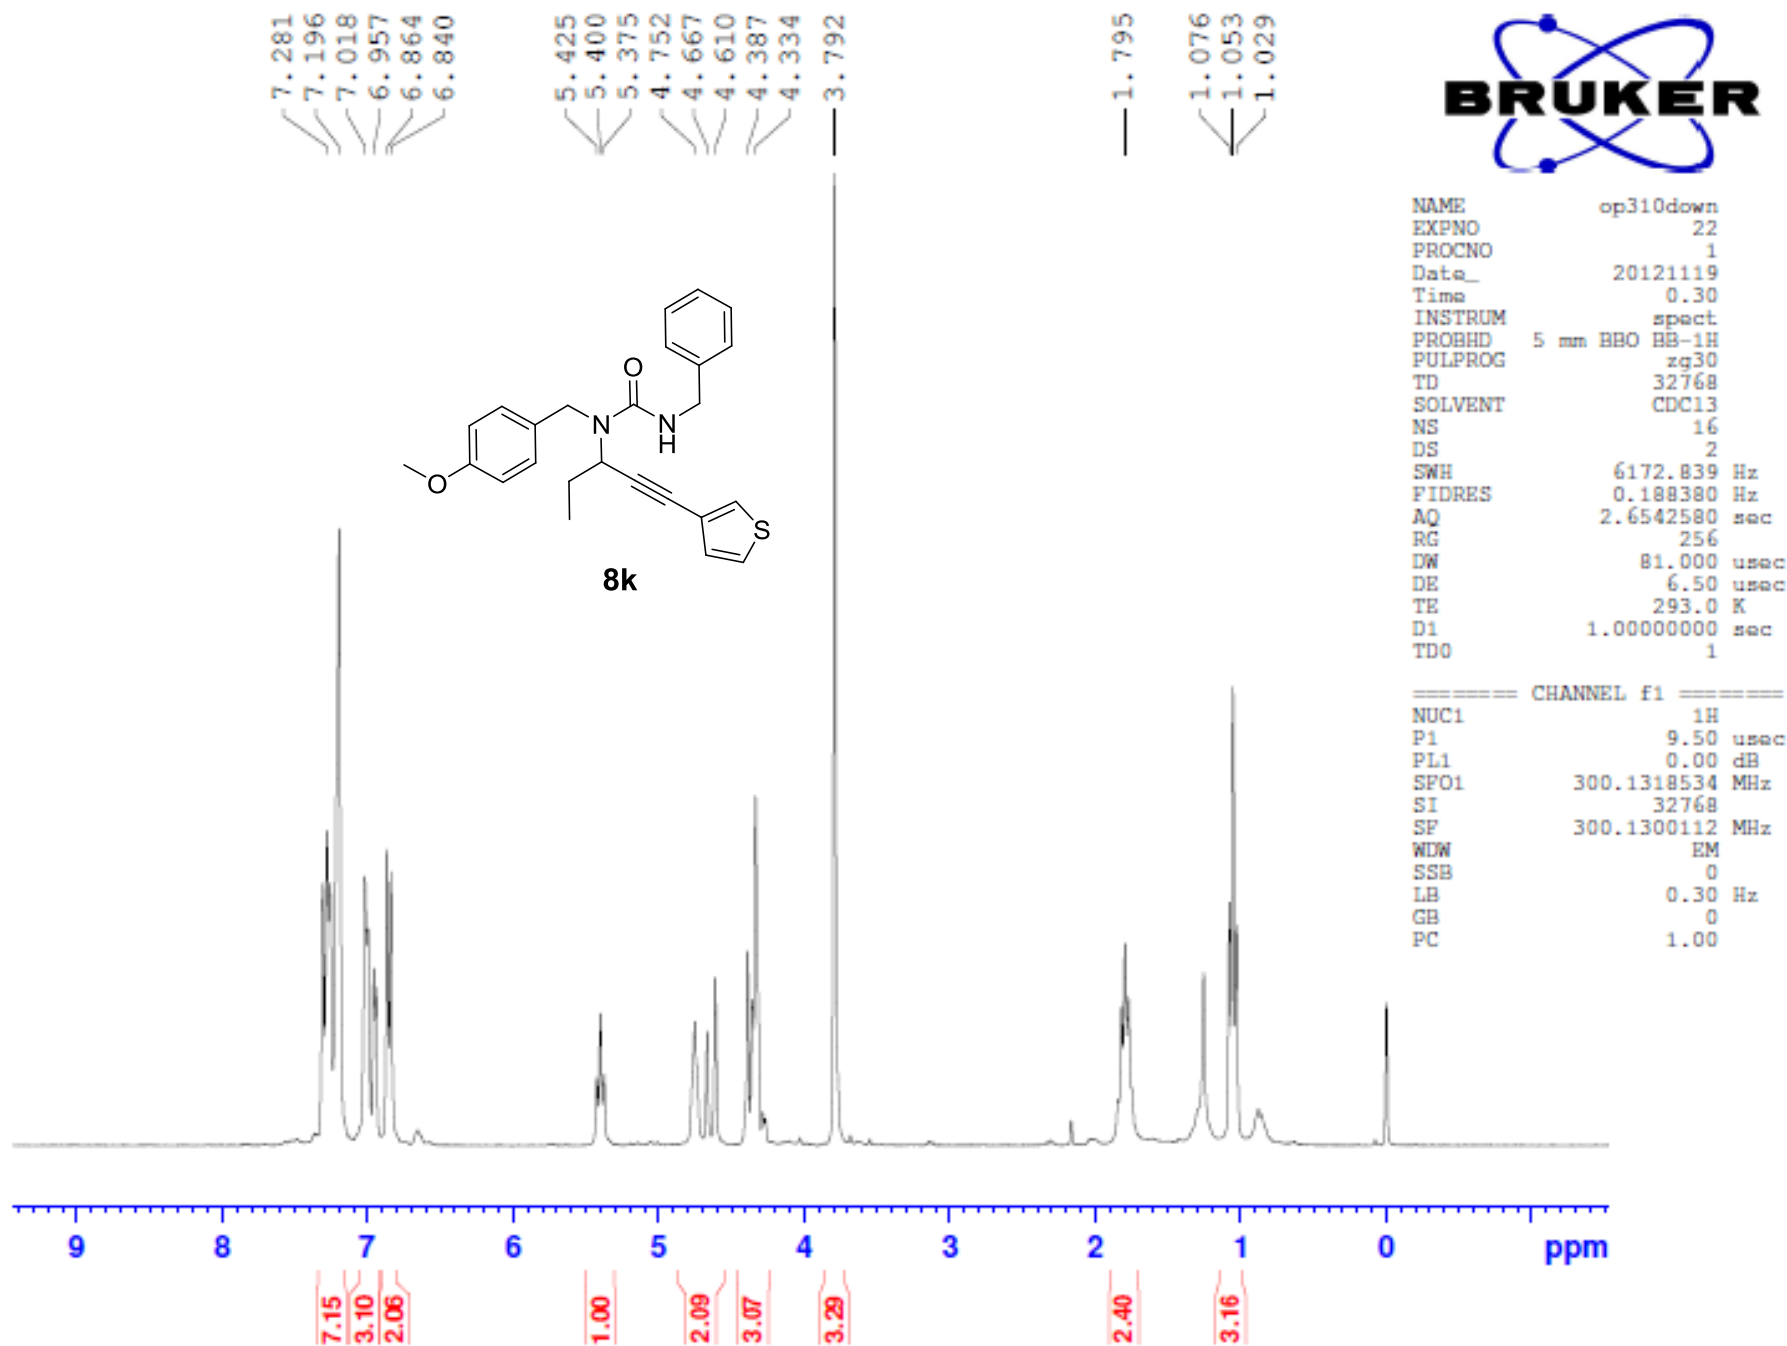

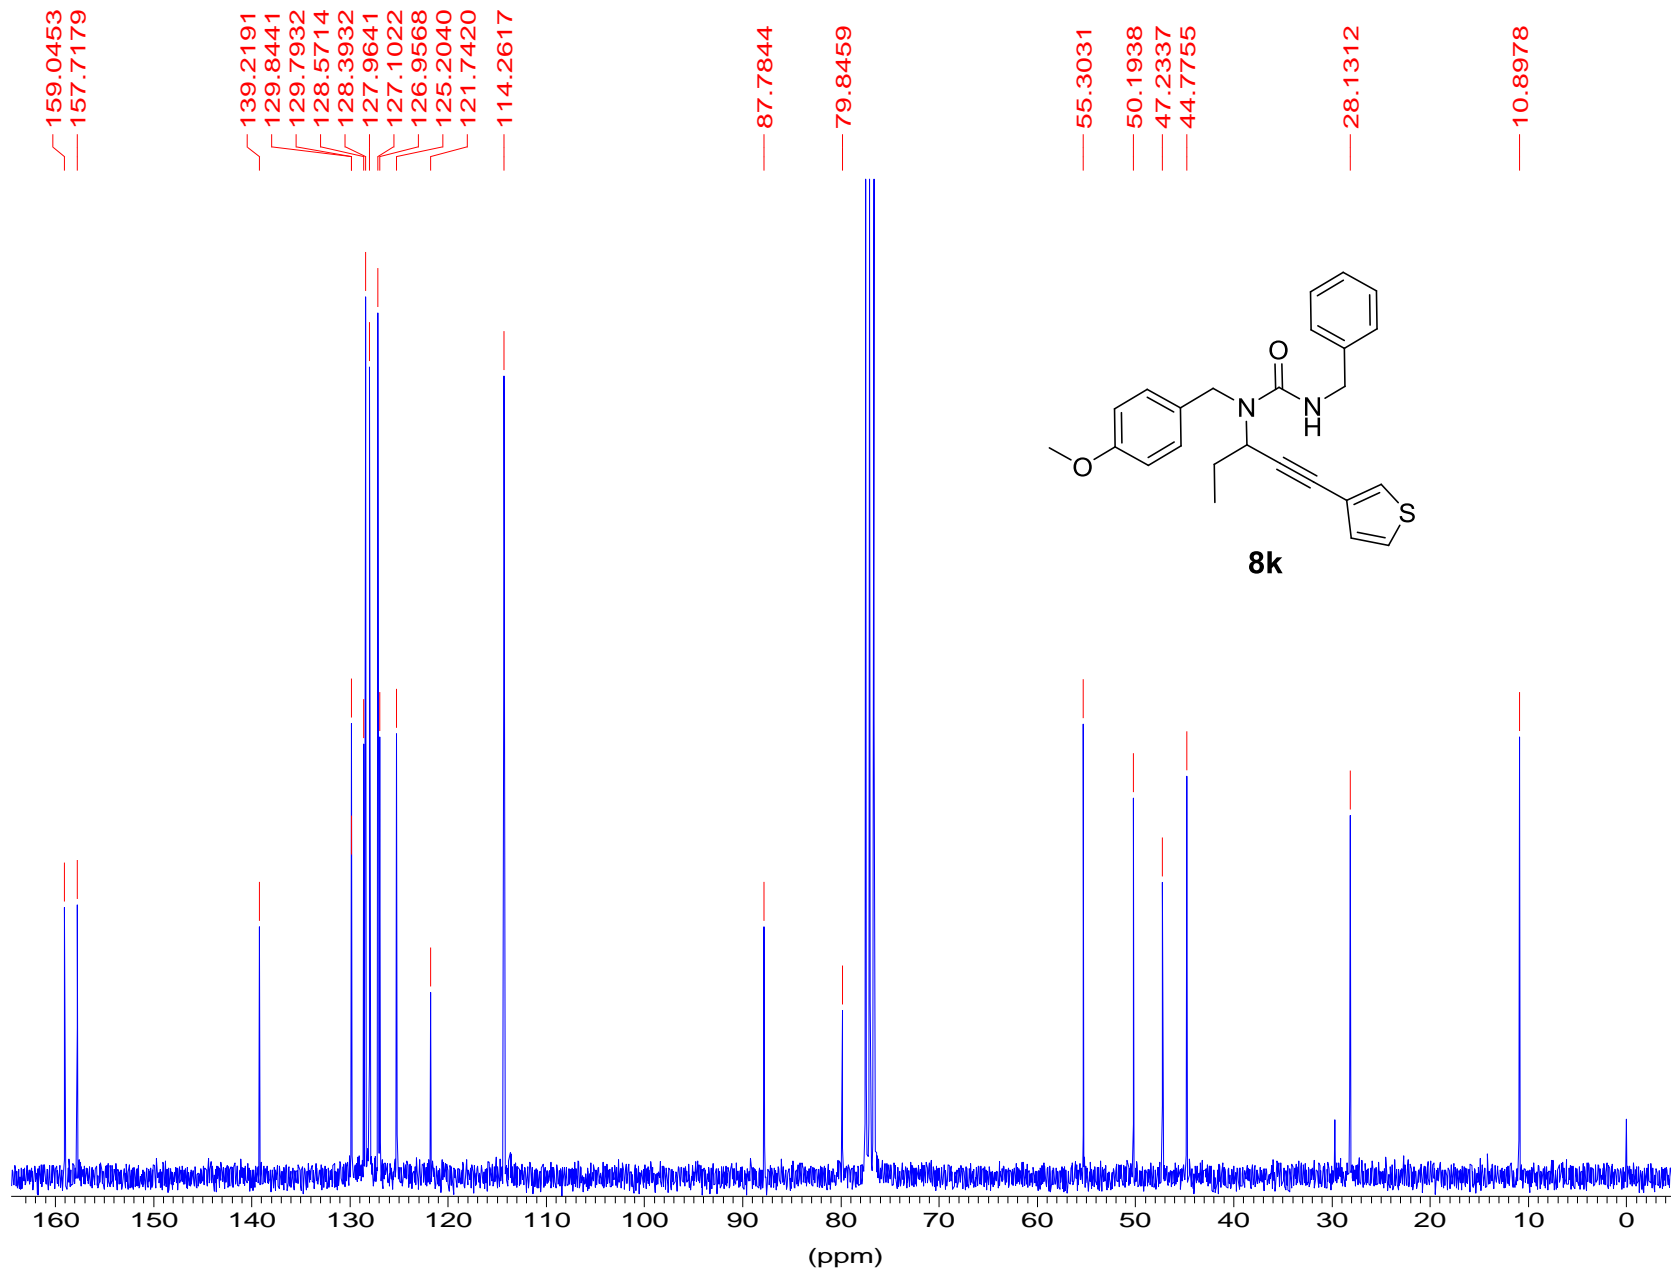

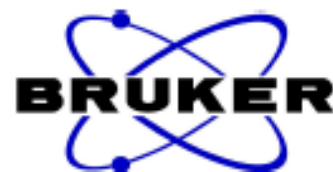

NAME op333r22HPLC  
EXPNO 20  
PROCNO 1  
Date\_ 20130215  
Time 7.53  
INSTRUM spect  
PROBHD 5 mm BBO BB-1H  
PULPROG zg30  
TD 32768  
SOLVENT CDCl3  
NS 16  
DS 2  
SWH 6172.839 Hz  
FIDRES 0.188380 Hz  
AQ 2.6542580 sec  
RG 574.7  
DW 81.000 usec  
DE 6.50 usec  
TE 296.6 K  
D1 1.00000000 sec  
TDO 1

==== CHANNEL f1 =====  
NUC1 1H  
P1 9.50 usec  
PL1 0.00 dB  
SFO1 300.1318534 MHz  
SI 32768  
SF 300.1300075 MHz  
WDW EM  
SSB 0  
LB 0.30 Hz  
GB 0  
PC 1.00

7.527  
7.347  
7.255  
7.101  
6.951  
6.844

5.736  
5.730  
5.364  
5.358  
5.045  
4.994

4.423  
4.373

3.539  
3.488

2.316

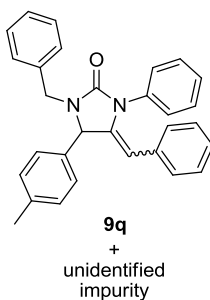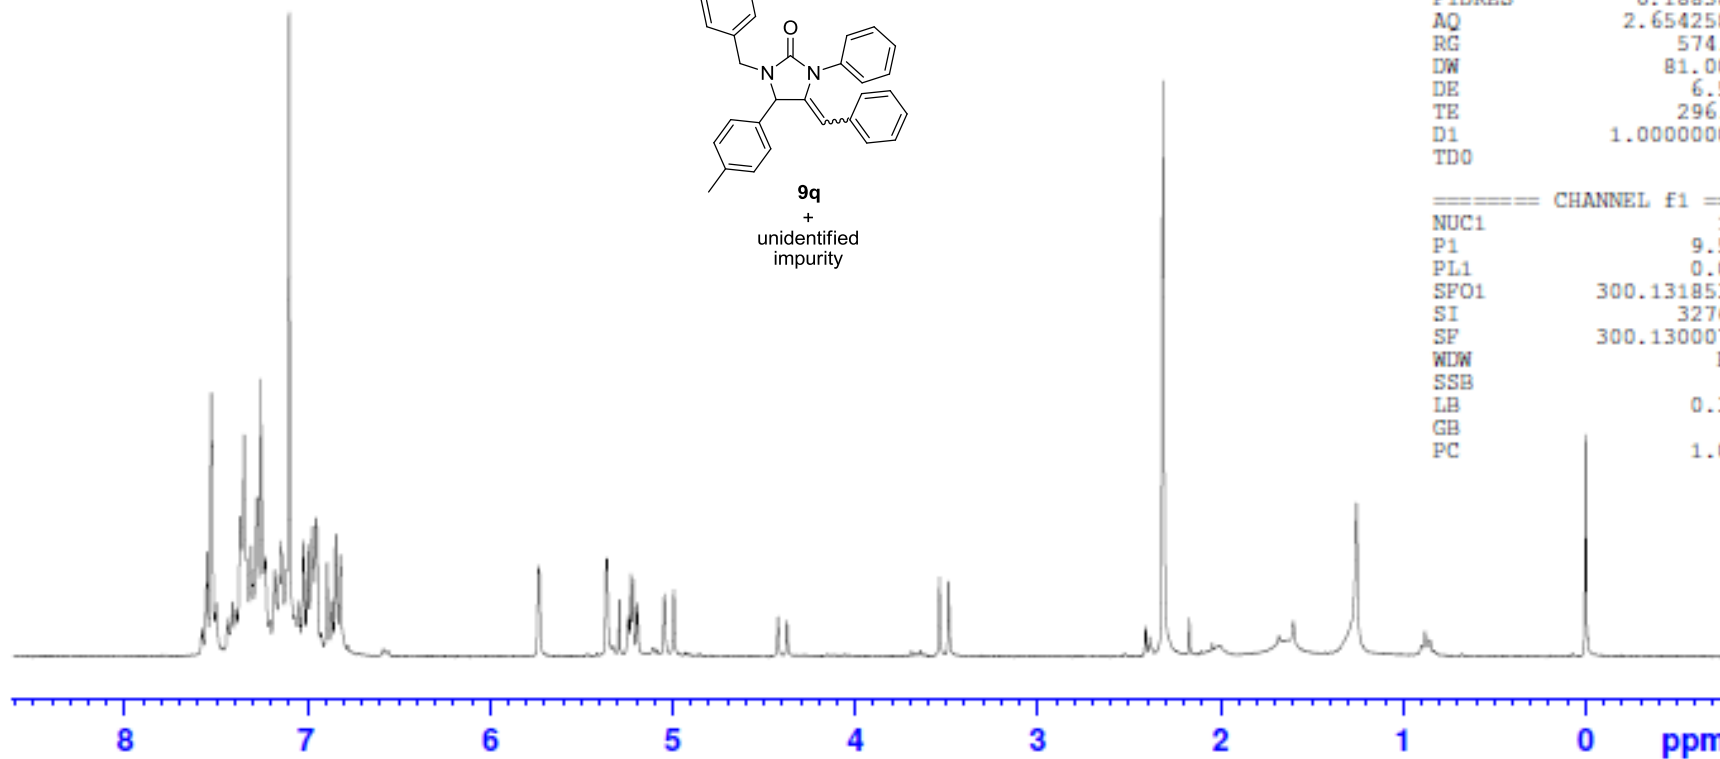

34.63

1.00

1.10

1.11

1.06

4.93



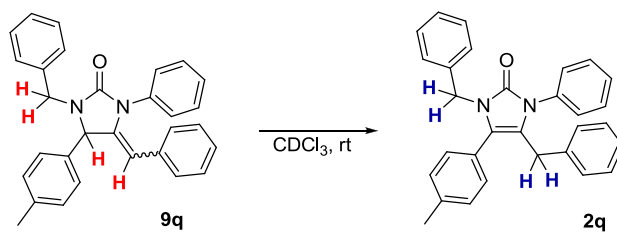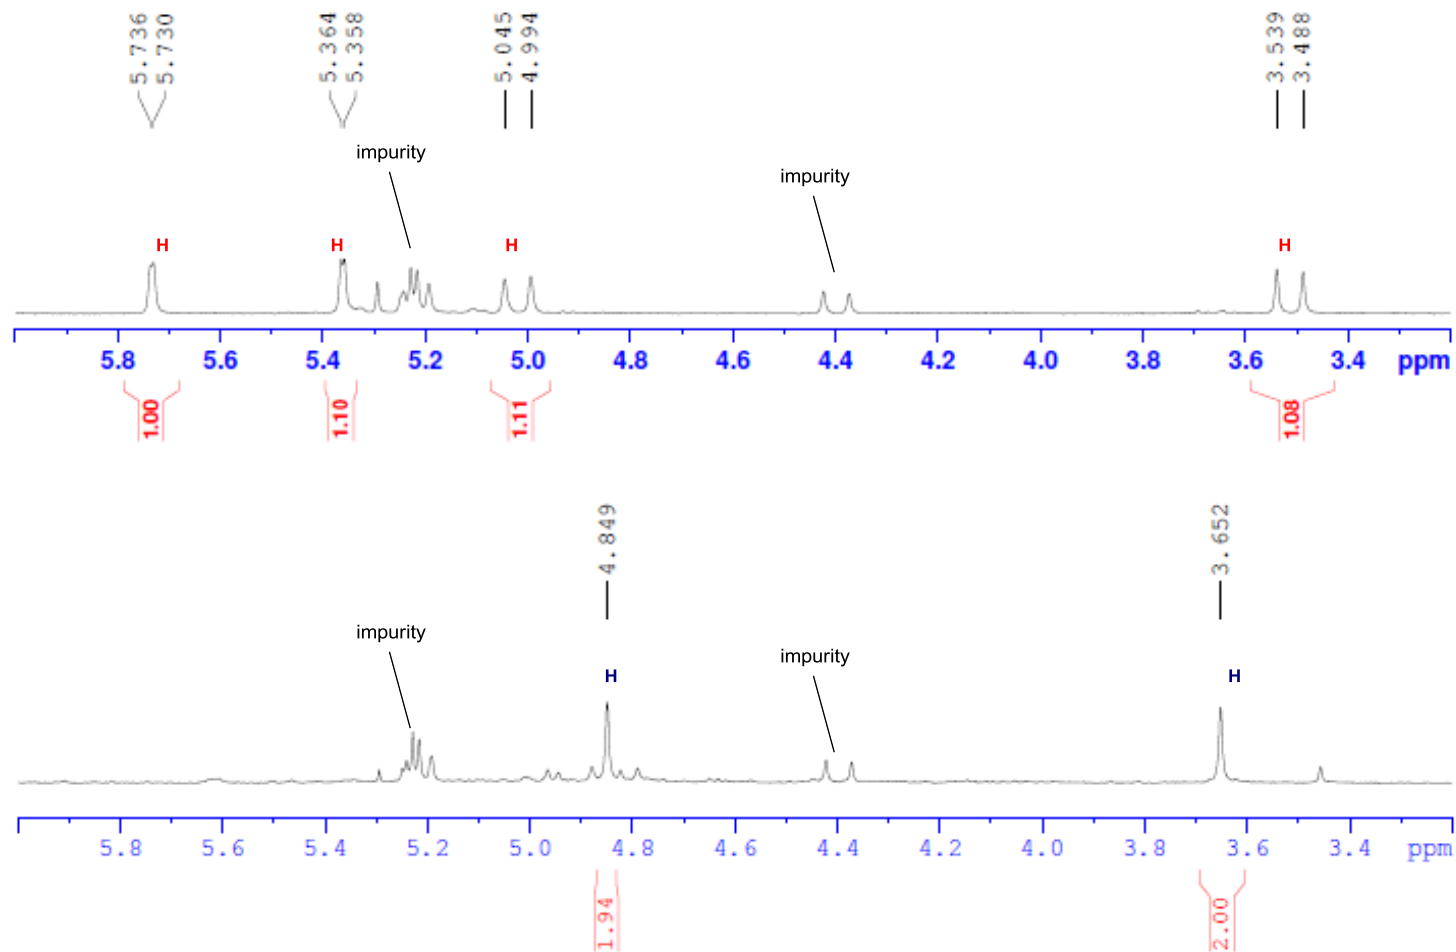

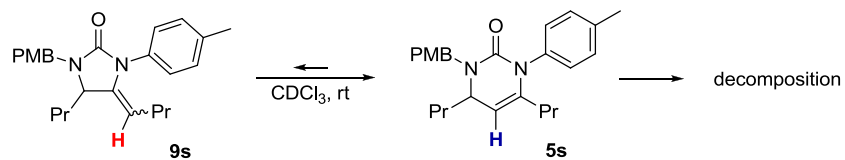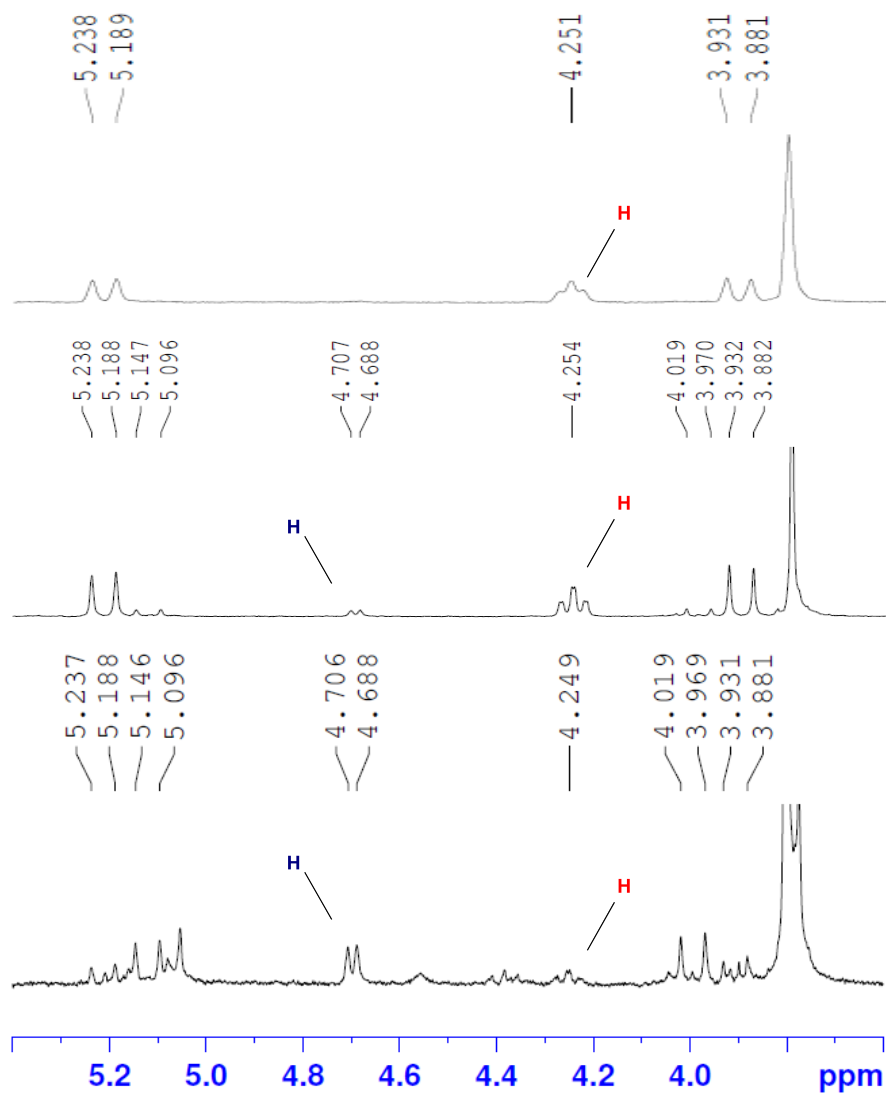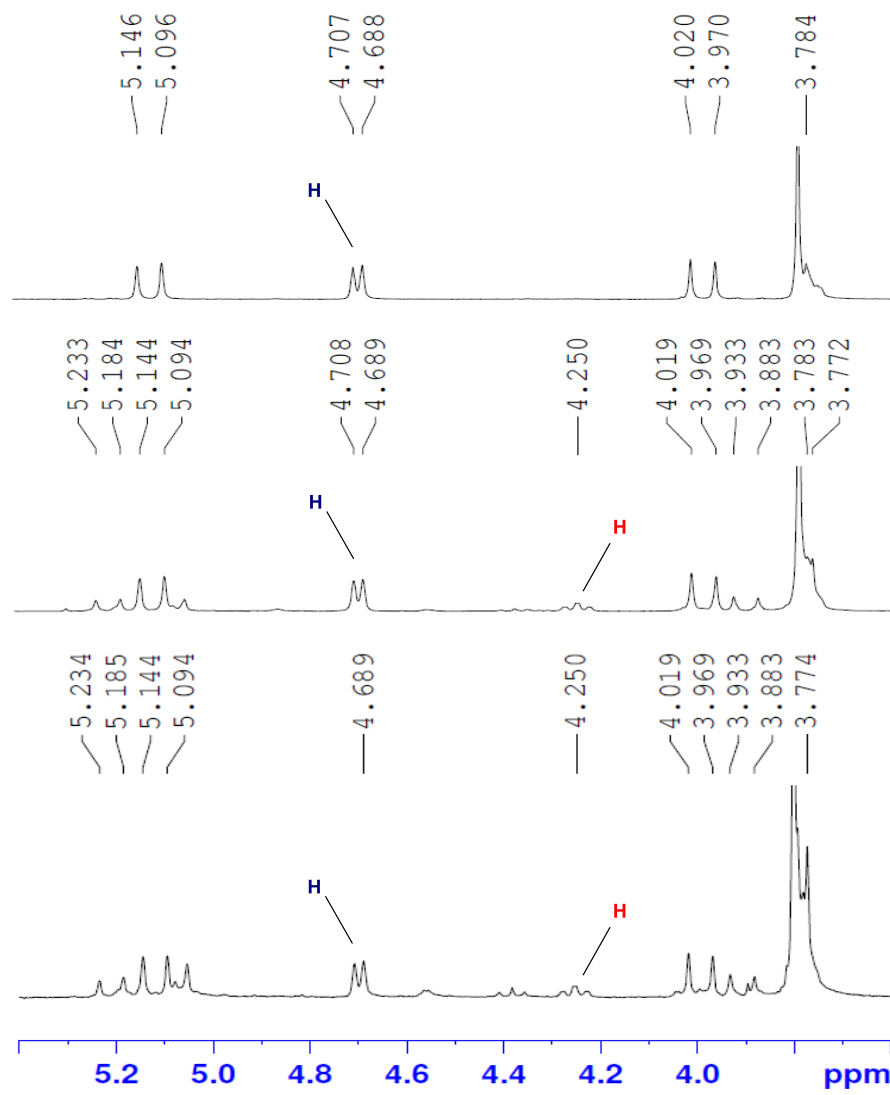

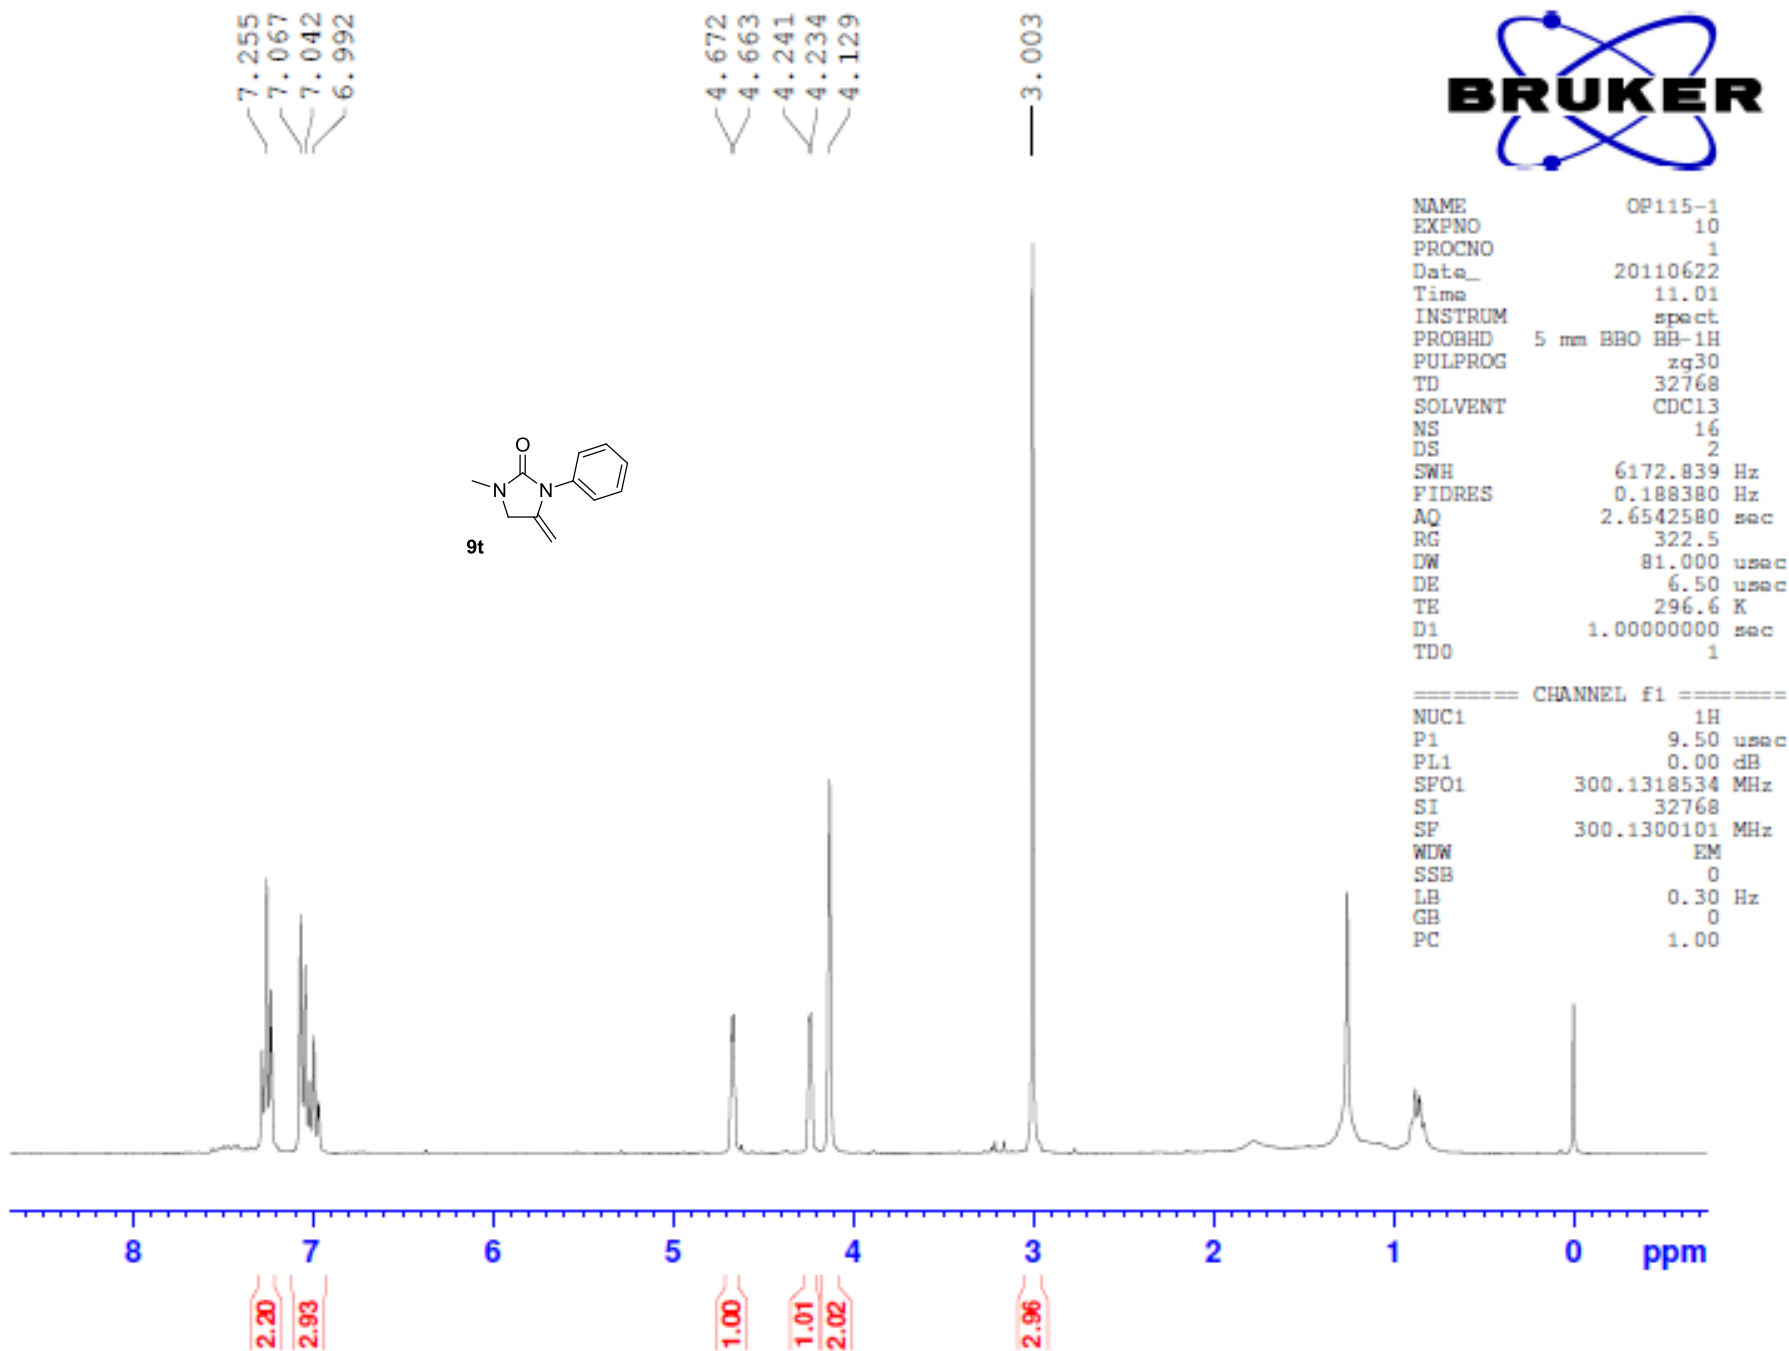

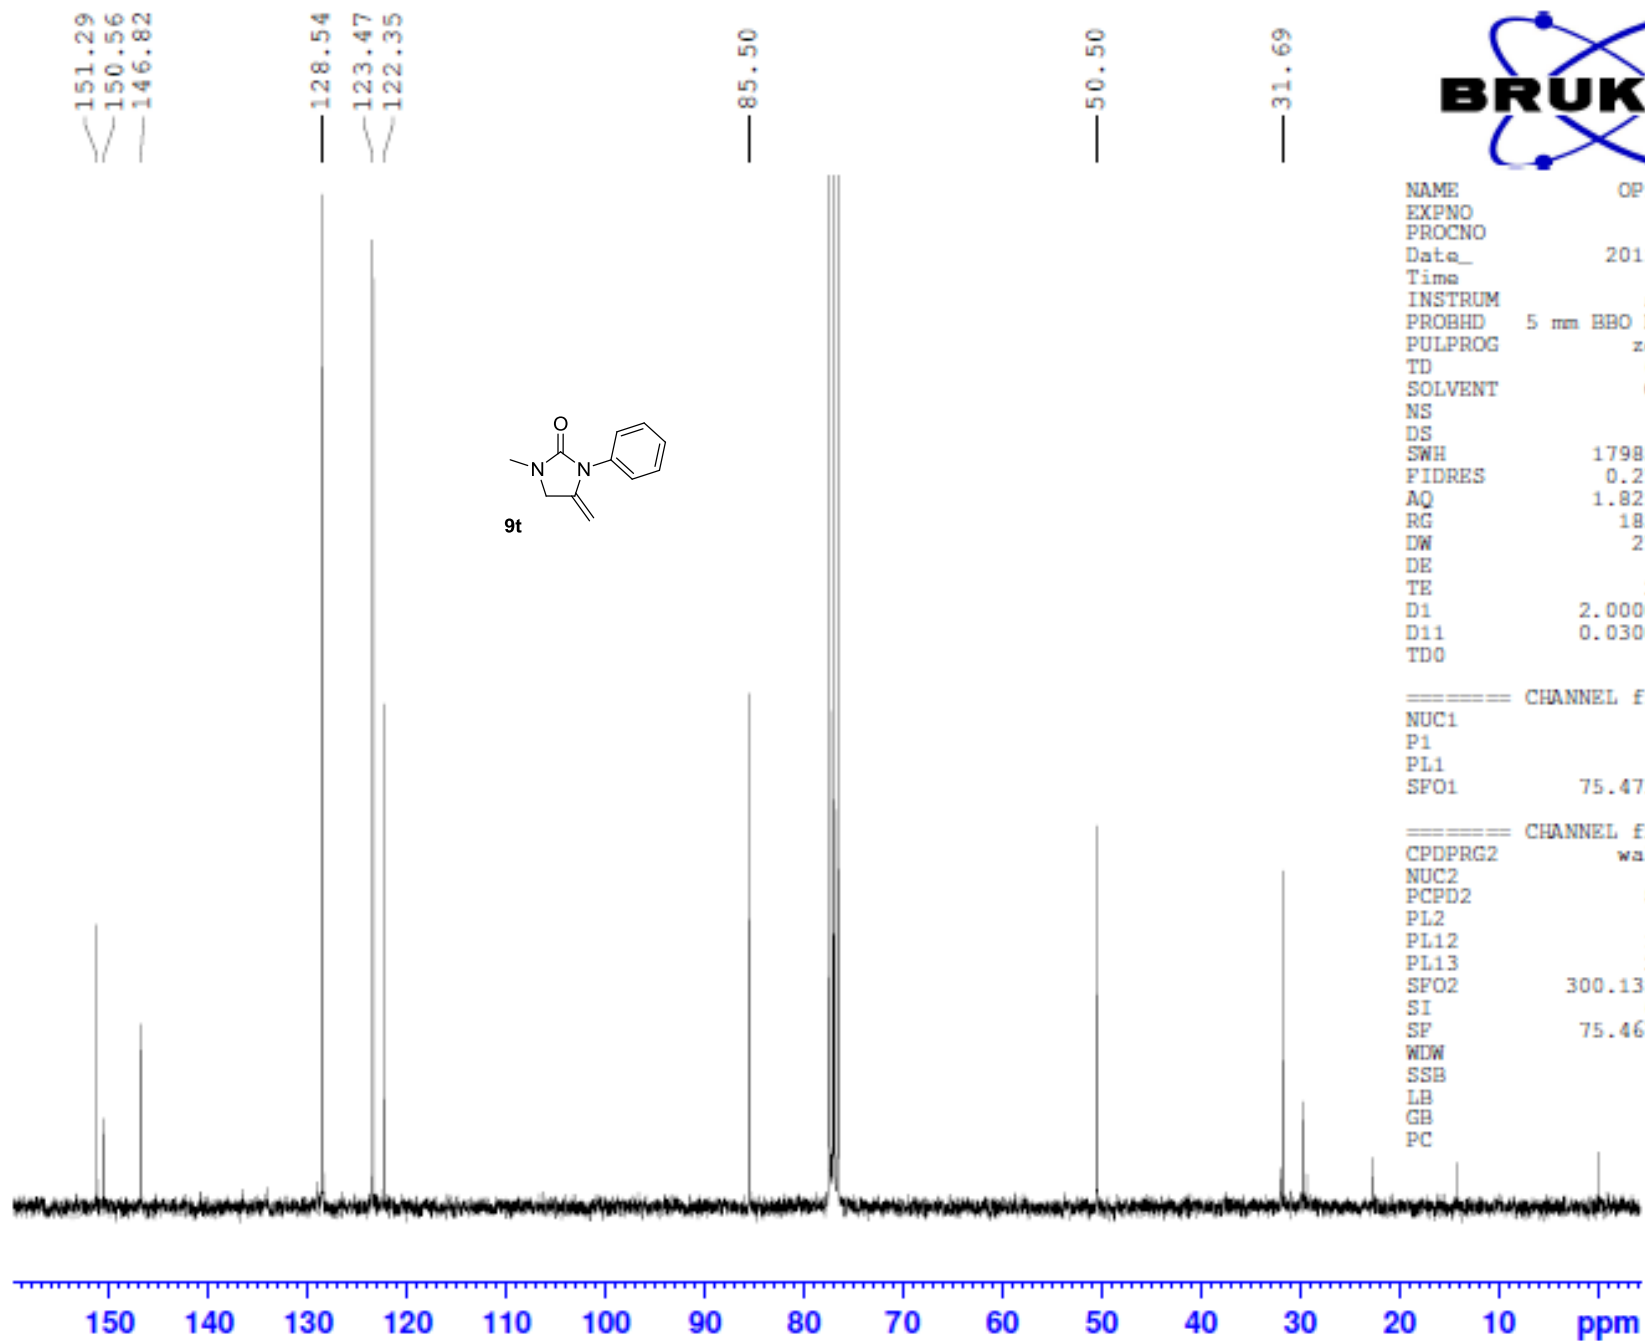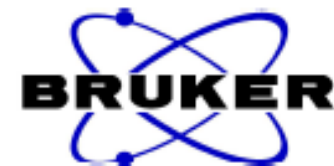

NAME OP115-1  
EXPNO 11  
PROCNO 1  
Date\_ 20110623  
Time 0.19  
INSTRUM spect  
PROBHD 5 mm BBO BB-1H  
PULPROG zgpg30  
TD 65536  
SOLVENT CDC13  
NS 1024  
DS 4  
SWH 17985.611 Hz  
FIDRES 0.274439 Hz  
AQ 1.8219508 sec  
RG 18390.4  
DW 27.800 usec  
DE 6.50 usec  
TE 297.4 K  
D1 2.00000000 sec  
D11 0.03000000 sec  
TDO 1

==== CHANNEL f1 =====  
NUC1 13C  
P1 8.25 usec  
PL1 0.00 dB  
SFO1 75.4752953 MHz

==== CHANNEL f2 =====  
CPDPRG2 waltz16  
NUC2 1H  
PCPD2 80.00 usec  
PL2 0.00 dB  
PL12 18.51 dB  
PL13 20.00 dB  
SFO2 300.1312005 MHz  
SI 65536  
SF 75.4677507 MHz  
WDW EM  
SSB 0  
LB 1.00 Hz  
GB 0  
PC 1.40

## Crystallographic data

X-ray intensity data for **5a** and **2a** were collected at respectively 100K and room temperature on an Agilent Supernova diffractometer, equipped with an Atlas CCD detector, using Mo K $\alpha$  radiation ( $\lambda = 0.7107 \text{ \AA}$ ). The images were interpreted and integrated with the CrysAlisPro software from Agilent Technologies.<sup>1</sup> Using Olex2,<sup>2</sup> the structure was solved with the ShelxS<sup>3</sup> structure solution program using Direct Methods and refined with the ShelxL<sup>3</sup> refinement package using full-matrix least squares minimization on  $F^2$ . In structure **5a**, C25 and C26 are modeled in two positions with occupancies of 0.5. Non hydrogen atoms were anisotropically refined and the hydrogen atoms in the riding mode with isotropic temperature factors were fixed at 1.2 times  $U_{eq}$  of the parent atoms (1.5 for methyl groups). CCDC-966797 and CCDC-966798 contain the supplementary crystallographic data for this paper. These data can be obtained free of charge from The Cambridge Crystallographic Data Centre via [www.ccdc.cam.ac.uk/data\\_request/cif](http://www.ccdc.cam.ac.uk/data_request/cif).

**5a** C<sub>26</sub>H<sub>26</sub>N<sub>2</sub>O,  $M = 382.49 \text{ g mol}^{-1}$ , monoclinic, P2<sub>1</sub>/n (no. 14),  $a = 9.9630(9) \text{ \AA}$ ,  $b = 10.2126(5) \text{ \AA}$ ,  $c = 21.0844(18) \text{ \AA}$ ,  $\beta = 97.452(10)$ ,  $V = 2127.2(3) \text{ \AA}^3$ ,  $T = 100.5(9) \text{ K}$ ,  $Z = 4$ ,  $\rho_{\text{calcd}} = 1.194 \text{ g cm}^{-3}$ ,  $\mu(\text{Mo K}\alpha) = 0.073 \text{ mm}^{-1}$ ,  $F(000) = 816.0$ , crystal size  $0.2 \times 0.2 \times 0.2 \text{ mm}^3$ , 9185 reflections measured, 4353 unique ( $R_{\text{int}} = 0.0253$ ) which were used in all calculations. The final  $wR_2$  was 0.1122 (all data) and  $R_1$  was 0.0458 ( $>2\sigma(I)$ ).

**2a** C<sub>26</sub>H<sub>26</sub>N<sub>2</sub>O,  $M = 382.49 \text{ g mol}^{-1}$ , triclinic, P-1 (no. 2),  $a = 7.8694(12) \text{ \AA}$ ,  $b = 10.0748(12) \text{ \AA}$ ,  $c = 13.8855(9) \text{ \AA}$ ,  $\alpha = 101.946(8) \text{ \AA}$ ,  $\beta = 92.094(8)$ ,  $\gamma = 105.143(12) \text{ \AA}$ ,  $V = 1034.8(2) \text{ \AA}^3$ ,  $T = 293(2) \text{ K}$ ,  $Z = 2$ ,  $\rho_{\text{calcd}} = 1.228 \text{ g cm}^{-3}$ ,  $\mu(\text{Mo K}\alpha) = 0.075 \text{ mm}^{-1}$ ,  $F(000) = 408.0$ , crystal size  $0.6 \times 0.4 \times 0.2 \text{ mm}^3$ , 21448 reflections measured, 4251 unique ( $R_{\text{int}} = 0.0164$ ) which were used in all calculations. The final  $wR_2$  was 0.1156 (all data) and  $R_1$  was 0.0427 ( $>2\sigma(I)$ ).

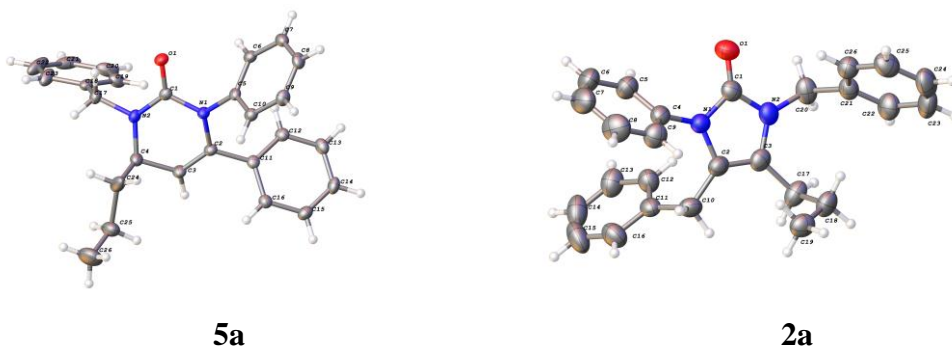

<sup>1</sup> CrysAlis PRO. Agilent Technologies UK Ltd, Yarnton, Oxfordshire, England, 2012.

<sup>2</sup> O. V. Dolomanov, L. J. Bourhis, R. J. Gildea, J. A. K. Howard and H. Puschmann, *J. Appl. Cryst.*, 2009, **42**, 339-341.

<sup>3</sup> G. M. Sheldrick, *Acta Cryst.*, 2008, **A64**, 112-122.
